# Supplementary material for: A Novel Coronavirus and a Broad Range of Viruses in Kenyan Cave Bats
Source: MDPI journal article supplement (doi:10.3390/v14122820), 2022-12-17
Supplement: s1 [file s1]

**Supplementary Table S3:** Overview of the of the retrovirus contigs obtained in positive samples.

| Location             | Sample    | Virus | Target region | Longest contig | Read count | ID     |
|----------------------|-----------|-------|---------------|----------------|------------|--------|
| Menengai Crater      | MEMT001   | MMER  | nsp           | 663bp          | 6949       | 98.94% |
|                      |           | MRER  | pol           | 270bp          | 4          | 93.81% |
|                      | MEMT002   | MMER  | nsp           | 663bp          | 662        | 98.79% |
|                      | MEMT003   | MMER  | nsp           | 663bp          | 4068       | 98.94% |
|                      | MEMT004   | MMER  | nsp           | 663bp          | 164        | 99.09% |
|                      | MEMT005   | MMER  | nsp           | 663bp          | 5864       | 98.94% |
|                      | MEMT006   | MMER  | nsp           | 543bp          | 15         | 98.52% |
| Soysambu Conservancy | MEMT007   | MMER  | nsp           | 663bp          | 4232       | 98.94% |
|                      | MEMT008   | MDER  | nsp           | 201bp          | 10         | 86.56% |
|                      |           | MMER  | nsp           | 663bp          | 3951       | 98.94% |
|                      | MEMT009   | MMER  | nsp           | 563bp          | 93         | 98.57% |
|                      | SYMN003   | RFRV  | gag-pol-env   | 8363bp         | 3318       | 97.07% |
|                      | SYRL001   | RFRV  | env           | 1619bp         | 265        | 95.39% |
|                      | SYRL002   | RFRV  | pol-env       | 2897bp         | 396        | 95.47% |
|                      | SYRL004   | RFRV  | env           | 906bp          | 110        | 95.41% |
|                      | SYRL005   | RFRV  | pol           | 409bp          | 315        | 93.64% |
|                      | SYRL006   | RFRV  | env           | 1877bp         | 257        | 92.31% |
|                      | SYRL007   | RFRV  | pol           | 609bp          | 145        | 94.83% |
|                      | SYRL008   | RFRV  | pol-env       | 822bp          | 150        | 95.14% |
|                      | SYRL009   | RFRV  | pol           | 1551bp         | 275        | 98.19% |
| Mount Suswa          | SYMA002   | RFRV  | pol-env       | 350bp          | 62         | 97.42% |
|                      | SUOHC1001 | GERV  | gag           | 223bp          | 333        | 74.55% |
|                      |           | MLRV  | pol           | 533bp          | 32         | 89.49% |
|                      | SUOHC1002 | GERV  | gag           | 223bp          | 182        | 74.55% |
|                      | SUOHC1003 | GERV  | gag           | 151bp          | 6          | 76.32% |
|                      | SUOHC1004 | GERV  | 5' LTR        | 204bp          | 167        | 64.07% |
|                      | SUOHC1005 | MLRV  | pol           | 390bp          | 31         | 90.00% |
|                      |           | GERV  | gag-pol       | 401bp          | 686        | 71.78% |
|                      | SUOHC1006 | MLRV  | pro-pol       | 754bp          | 31         | 87.78% |
|                      |           | GERV  | gag           | 223bp          | 232        | 75.00% |
|                      | SUOHC1007 | MLRV  | pol           | 434bp          | 16         | 87.78% |
|                      |           | GERV  | gag-pol       | 394bp          | 996        | 71.78% |
|                      | SUOHC1011 | MLRV  | pro-pol       | 941bp          | 56         | 91.22% |
|                      |           | GERV  | 5' LTR        | 282bp          | 262        | 60.49% |
|                      | SUOHC1013 | MLRV  | pro-pol       | 912bp          | 30         | 88.48% |
|                      |           | RAFV1 | pol           | 220bp          | 933        | 76.81% |
|                      | SUOHC1014 | GERV  | gag           | 223bp          | 55         | 74.55% |
|                      | SUOHC2001 | GERV  | 5' LTR        | 190bp          | 271        | 60.82% |
|                      | SUOHC2002 | MLRV  | pro-pol       | 947bp          | 45         | 92.71% |
|                      |           | GERV  | 5' LTR        | 191bp          | 129        | 59.27% |
|                      | SUOHC2004 | MLRV  | pol           | 395bp          | 74         | 90.12% |
|                      |           | GERV  | 5' LTR        | 281bp          | 257        | 58.33% |
|                      | SUOHC3001 | MLRV  | pro-pol       | 927bp          | 63         | 92.88% |
|                      |           | GERV  | pol           | 460bp          | 667        | 71.98% |
|                      | SUOHC3002 | MLRV  | pro-pol       | 324bp          | 24         | 91.35% |
|                      |           | GERV  | gag           | 249bp          | 138        | 70.38% |
|                      | SUOHC3003 | MLRV  | pro-pol       | 426bp          | 15         | 86.65% |
|                      |           | GERV  | gag           | 272bp          | 364        | 71.41% |
|                      | SUOHC3004 | MLRV  | pro-pol       | 925bp          | 45         | 93.41% |
|                      |           | GERV  | 5' LTR        | 242bp          | 1161       | 60.97% |
|                      | SUOHC3005 | MLRV  | pro           | 261bp          | 19         | 92.72% |
|                      |           | GERV  | 5' LTR        | 192bp          | 103        | 59.79% |
|                      | SUOHC3006 | MLRV  | pol           | 338bp          | 590        | 75.74% |
|                      |           | MLRV  | pol           | 484bp          | 30         | 91.39% |
|                      | SUOHC3007 | GERV  | gag           | 257bp          | 209        | 70.91% |
|                      |           | MLRV  | pro-pol       | 899bp          | 23         | 89.85% |
|                      | SUOHC3008 | MLRV  | pro-pol       | 913bp          | 32         | 90.25% |

MMER: *Myotis myotis* endogenous retrovirus; MRER: *Myotis ricketti* endogenous retrovirus; MDER: *Myotis daubentonii* endogenous retrovirus; RFRV: *Rhinolophus ferrumequinum* retrovirus; GERV: *Galidia* endogenous retrovirus; MLRV: murine leukemia virus-related virus. Identities are provided according to the closely-related virus sequences and based on nucleotide BLAST results. (bp: base pairs)
