# Supplementary material for: A Novel Coronavirus and a Broad Range of Viruses in Kenyan Cave Bats
Source: MDPI journal article supplement (doi:10.3390/v14122820), 2022-12-17
Supplement: s1 [file s1]

**Supplementary Table S2:** Overview of the coronavirus contigs obtained in positive samples

| Location                         | Sample    | Read count | Contigs |           |              |              |            |           |              |            |               |               |
|----------------------------------|-----------|------------|---------|-----------|--------------|--------------|------------|-----------|--------------|------------|---------------|---------------|
| Site 2<br>(Soysambu Conservancy) | SYRL007   | 145        | Region  | Contig 1  |              |              |            |           |              |            |               |               |
|                                  |           |            | Range   | (425bp)   |              |              |            |           |              |            |               |               |
| Site 3<br>(Mount Suswa)          | SUOHC1001 | 1067       | ID      | ORF1ab    |              |              |            |           |              |            |               |               |
|                                  |           |            |         | 1-425     |              |              |            |           |              |            |               |               |
|                                  |           |            |         | 94.33%    |              |              |            |           |              |            |               |               |
|                                  |           |            | Region  | Contig 1  |              |              |            |           |              |            |               |               |
|                                  |           |            | Range   | (5329bp)  |              |              |            |           |              |            |               |               |
|                                  |           |            | ID      | ORF1ab    |              |              |            |           |              |            |               |               |
|                                  |           |            |         | 1-5329    |              |              |            |           |              |            |               |               |
|                                  |           |            |         | 98.45%    |              |              |            |           |              |            |               |               |
|                                  | SUOHC1004 | 8673       | Region  | Contig 1  | Contig 2     | Contig 3     |            |           | Contig 4     | Contig 5   |               |               |
|                                  |           |            | Range   | (11893bp) | (809bp)      | (1235bp)     |            |           | (476bp)      | (610bp)    |               |               |
|                                  |           |            | ID      | ORF1ab    | S partial    | E partial    | M complete | N partial | N partial    | N partial  | ORFx complete |               |
|                                  |           |            |         | 1-11893   | 1-809        | 1-39         | 49-729     | 740-1235  | 1-476        | 1-123      | 137-367       |               |
|                                  | SUOHC1005 | 52196      |         | 93.06%    | 65.93%       | 75.00%       | 94.25%     | 83.83%    | 88.59%       | 84.85%     | 66.67%        |               |
|                                  |           |            | Region  | Contig 1  | Contig 2     | Contig 3     |            |           | Contig 4     |            | Contig 5      | Contig 6      |
|                                  |           |            | Range   | (14647bp) | (847bp)      | (571bp)      |            |           | (1235bp)     |            | (476bp)       | (612bp)       |
|                                  |           |            | ID      | ORF1ab    | S partial    | NS3B partial | E partial  | E partial | M complete   | N partial  | N partial     | N partial     |
|                                  |           |            |         | 1-14647   | 1-847        | 1-543        | 524-571    | 1-39      | 49-729       | 740-1235   | 1-476         | 1-123         |
|                                  |           |            |         | 91.27%    | 64.89%       | 74.43%       | 75.00%     | 75.00%    | 94.25%       | 83.83%     | 88.59%        | 84.85%        |
|                                  | SUOHC1012 | 45         | Region  | Contig 1  |              |              |            |           |              |            |               |               |
|                                  |           |            | Range   | (476bp)   |              |              |            |           |              |            |               |               |
|                                  |           |            | ID      | N partial |              |              |            |           |              |            |               |               |
|                                  |           |            |         | 1-476     |              |              |            |           |              |            |               |               |
|                                  | SUOHC1013 | 34507      |         | 88.59%    |              |              |            |           |              |            |               |               |
|                                  |           |            | Region  | Contig 1  | Contig 2     | Contig 3     |            |           | Contig 4     | Contig 5   |               |               |
|                                  |           |            | Range   | (12065bp) | (525bp)      | (1107bp)     |            |           | (446bp)      | (611bp)    |               |               |
|                                  |           |            | ID      | ORF1ab    | NS3B partial | E partial    | M complete | N partial | N partial    | N partial  | ORFx complete |               |
|                                  |           |            |         | 1-12065   | 1-525        | 1-36         | 46-726     | 736-1107  | 1-446        | 1-123      | 137-367       |               |
|                                  |           |            |         | 93.09%    | 74.29%       | 72.73%       | 93.81%     | 83.74%    | 81.76%       | 81.82%     | 66.67%        |               |
|                                  | SUOHC2001 | 1037       | Region  | Contig 1  | Contig 2     |              |            |           |              |            |               |               |
|                                  |           |            | Range   | (8048bp)  | (781bp)      |              |            |           |              |            |               |               |
|                                  |           |            | ID      | ORF1ab    | S partial    |              |            |           |              |            |               |               |
|                                  |           |            |         | 1-8048    | 1-781        |              |            |           |              |            |               |               |
|                                  | SUOHC2004 | 171        |         | 97.65%    | 65.42%       |              |            |           |              |            |               |               |
|                                  |           |            | Region  | Contig 1  |              |              |            |           |              |            |               |               |
|                                  |           |            | Range   | (865bp)   |              |              |            |           |              |            |               |               |
|                                  |           |            | ID      | ORF1ab    |              |              |            |           |              |            |               |               |
|                                  |           |            |         | 1-865     |              |              |            |           |              |            |               |               |
|                                  |           |            |         | 98.95%    |              |              |            |           |              |            |               |               |
|                                  | SUOHC3001 | 22943      | Region  | Contig 1  | Contig 2     | Contig 3     |            |           | Contig 4     | Contig 5   |               |               |
|                                  |           |            | Range   | (14666bp) | (539bp)      | (1235bp)     |            |           | (476bp)      | (608bp)    |               |               |
|                                  |           |            | ID      | ORF1ab    | NS3B partial | E partial    | M complete | N partial | N partial    | N partial  | ORFx complete |               |
|                                  |           |            |         | 1-14666   | 1-539        | 1-39         | 49-729     | 740-1235  | 1-476        | 1-122      | 136-366       |               |
|                                  | SUOHC3002 | 11893      |         | 91.41%    | 73.74%       | 75.00%       | 94.25%     | 83.83%    | 88.59%       | 87.10%     | 66.67%        |               |
|                                  |           |            | Region  | Contig 1  | Contig 2     | Contig 3     |            |           | Contig 4     |            | Contig 5      |               |
|                                  |           |            | Range   | (8048bp)  | (809bp)      | (557bp)      |            |           | (1831bp)     |            | (612bp)       |               |
|                                  |           |            | ID      | ORF1ab    | S partial    | NS3B partial | E partial  | E partial | M complete   | N partial  | N partial     | ORFx complete |
|                                  |           |            |         | 1-8048    | 1-809        | 1-548        | 549-557    | 1-39      | 49-729       | 740-1831   | 1-123         | 137-372       |
|                                  |           |            |         | 97.76%    | 65.93%       | 74.30%       | 75.00%     | 75.00%    | 94.25%       | 79.40%     | 84.85%        | 66.67%        |
|                                  | SUOHC3004 | 12100      | Region  | Contig 1  | Contig 2     | Contig 3     | Contig 4   | Contig 5  |              |            |               | Contig 6      |
|                                  |           |            | Range   | (11908bp) | (970bp)      | (485bp)      | (1197bp)   | (2274bp)  |              |            |               | (443bp)       |
|                                  |           |            | ID      | ORF1ab    | S partial    | S partial    | S partial  | S partial | NS3 complete | E complete | M complete    | N partial     |
|                                  |           |            |         | 1-11908   | 1-970        | 1-485        | 1-1197     | 1-353     | 352-1040     | 989-1216   | 1226-1096     | 1917-2274     |
|                                  |           |            |         | 94.57%    | 62.97%       | 72.05%       | 79.35%     | 79.31%    | 70.37%       | 73.61%     | 94.25%        | 85.71%        |
|                                  |           |            | Region  | Contig 1  |              |              |            |           |              |            |               |               |
|                                  |           |            | Range   | (413bp)   |              |              |            |           |              |            |               |               |
|                                  |           |            | ID      | ORF1ab    |              |              |            |           |              |            |               |               |
|                                  |           |            |         | 1-413     |              |              |            |           |              |            |               |               |
|                                  |           |            |         | 96.38%    |              |              |            |           |              |            |               |               |
|                                  | SUOHC3007 | 226        | Region  | Contig 1  |              |              |            |           |              |            |               |               |
|                                  |           |            | Range   | (1133bp)  |              |              |            |           |              |            |               |               |
|                                  |           |            | ID      | ORF1ab    |              |              |            |           |              |            |               |               |
|                                  |           |            |         | 1-1133    |              |              |            |           |              |            |               |               |
|                                  |           |            |         | 98.67%    |              |              |            |           |              |            |               |               |

Identities are provided according to the closely-related virus sequences and based on nucleotide BLAST results. (bp: base pairs).
