# Supplementary material for: A Novel Coronavirus and a Broad Range of Viruses in Kenyan Cave Bats
Source: MDPI journal article supplement (doi:10.3390/v14122820), 2022-12-17
Supplement: s1 [file s1]

**Supplementary Table S4:** Overview of the astrovirus and miscellaneous virus contigs obtained in positive samples

| Location                | Sample  | Virus                       | Target region    | Longest contig | Read count | ID     |
|-------------------------|---------|-----------------------------|------------------|----------------|------------|--------|
| Menengai Crater         | MEMN002 | Bat astrovirus              | ORF1ab           | 1194 bp        | 48         | 82.15% |
|                         | MEMN006 | Bat astrovirus              | ORF1ab           | 940 bp         | 249        | 84.61% |
|                         |         | Rhopalosiphum padi virus    | ORF1             | 270 bp         | 4          | 96.29% |
| Soysambu<br>Conservancy | MEMN009 | Actinidia yellowing virus 2 | Coat protein     | 481 bp         | 83         | 84.94% |
|                         | SYMA003 | Bat astrovirus              | ORF1ab           | 2181bp         | 168        | 82.48% |
|                         | SYMA004 | Bole tick virus 4           | Polyprotein      | 292 bp         | 14         | 99.31% |
|                         | SYMA006 | Bat astrovirus              | ORF1ab           | 1327 bp        | 203        | 78.15% |
|                         | SYMA008 | Bat astrovirus              | ORF1ab           | 2189 bp        | 185        | 80.14% |
|                         |         | Bat herpesvirus             | Helicase/primase | 381 bp         | 34         | 81.62% |
|                         |         | Bat astrovirus              | ORF1ab           | 533 bp         | 13         | 78.99% |
|                         | SYMA010 | Bat astrovirus              | ORF1ab           | 1178 bp        | 1499       | 82.05% |
|                         | SYRL004 | Bat astrovirus              | Capsid precursor | 380 bp         | 12         | 77.10% |
|                         | SYRL007 | Bat astrovirus              | ORF1ab           | 235 bp         | 8          | 75.21% |
|                         | SYMN007 | Bat astrovirus              | ORF1ab           | 2153 bp        | 1021       | 78.84% |
|                         | SYMN010 | Bat astrovirus              | ORF1ab           | 1172 bp        | 27         | 80.90% |
|                         | SYMN011 | Bat astrovirus              | ORF1ab           | 377 bp         | 14         | 76.92% |
|                         |         | Cyclovirus                  | Rep              | 1052 bp        | 212        | 90.02% |
|                         | SYMN012 | Bat astrovirus              | ORF1ab           | 2227 bp        | 2239       | 79.41% |

Identities are provided according to the closely-related virus sequences and based on nucleotide BLAST results. (bp: base pairs).
