# Supplementary material for: A Novel Coronavirus and a Broad Range of Viruses in Kenyan Cave Bats
Source: MDPI journal article supplement (doi:10.3390/v14122820), 2022-12-17

**Supplementary Figure S8:** Alignment of the *Rhinolophus affinis* foamy virus 1 sequence detected in a bat. Positions are indicated according to the reference strain (GenBank accession: JQ814855).

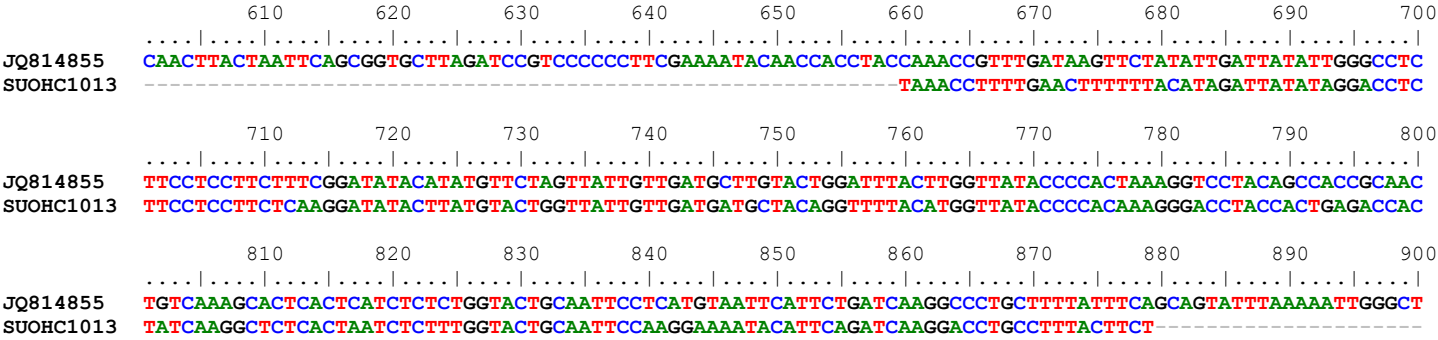

Supplement: s1 [file s1]
