# Supplementary material for: A Novel Coronavirus and a Broad Range of Viruses in Kenyan Cave Bats
Source: MDPI journal article supplement (doi:10.3390/v14122820), 2022-12-17
Supplement: s1 [file s1]

**Supplementary Figure S4:** Alignment of the *Myotis myotis* endogenous retrovirus (MMER) (A), *Myotis ricketti* endogenous retrovirus (MRER) (B) and *Myotis daubentonii* endogenous retrovirus (MDER) (C) sequences identified in bat samples. Identical nucleotides with the reference sequence are shown as colored dots. Positions are numbered according to the reference sequence in each alignment

**A: MN851302. Myotis myotis endogenous retrovirus isolate EuB-RV1**

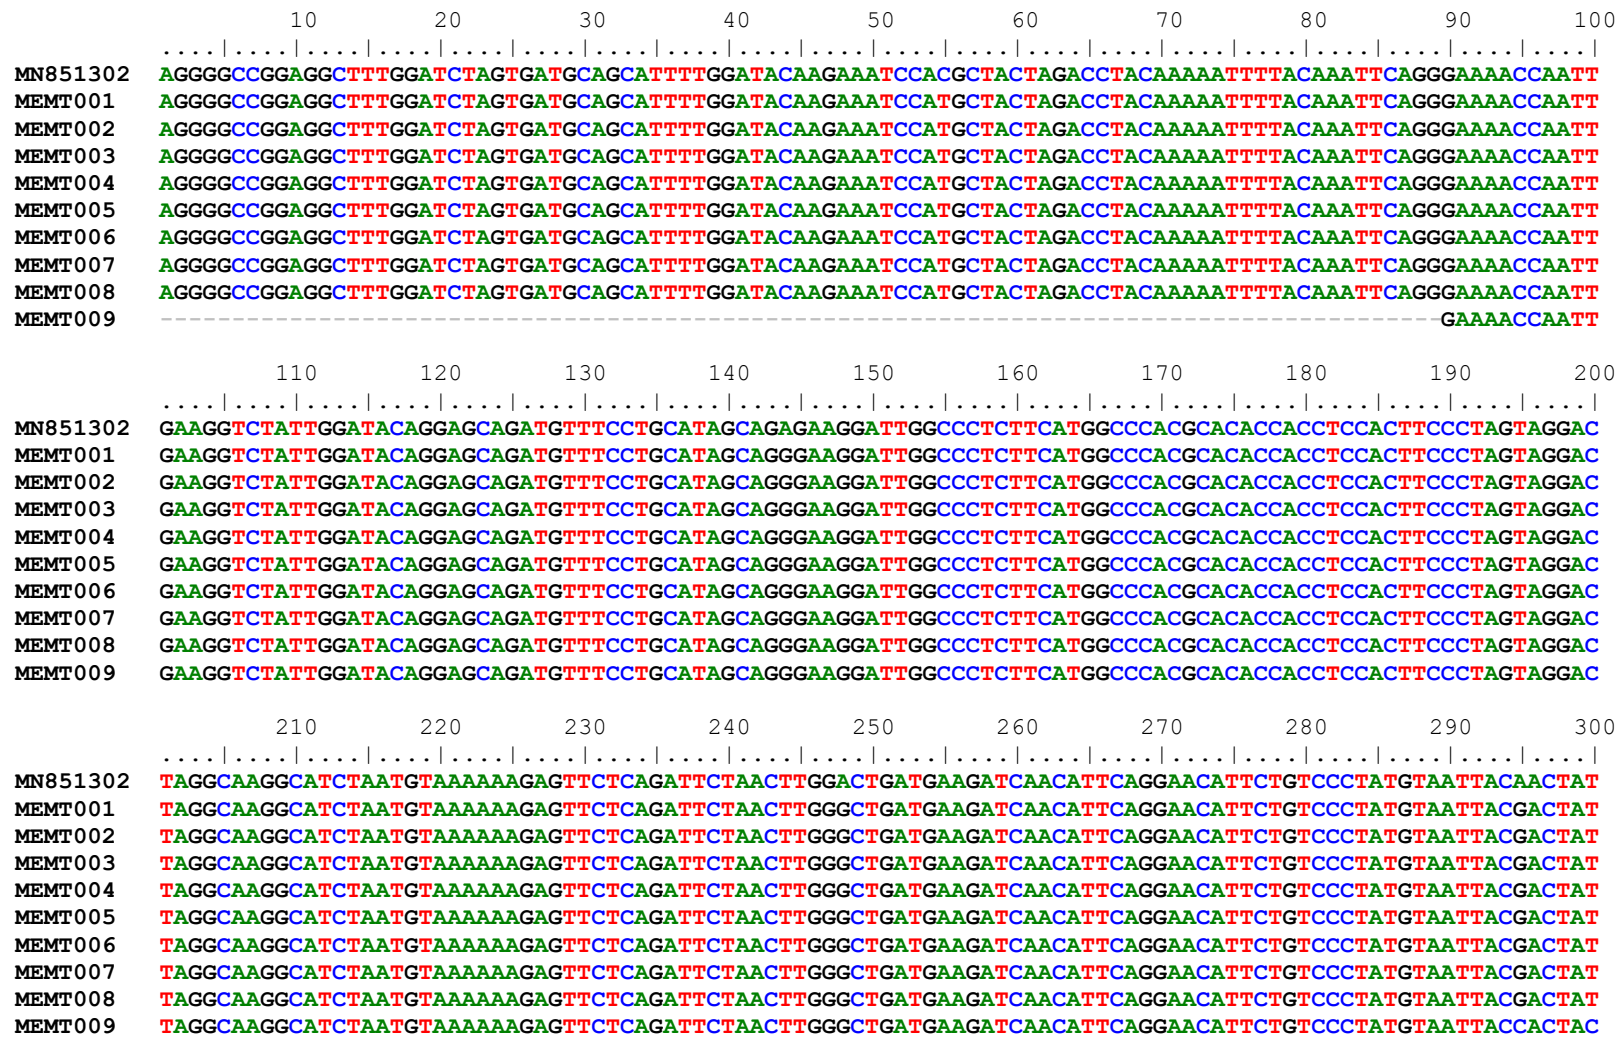



|          |                                                                                 |     |     |     |     |     |
|----------|---------------------------------------------------------------------------------|-----|-----|-----|-----|-----|
|          | 610                                                                             | 620 | 630 | 640 | 650 | 660 |
|          | .... .... .... .... .... .... .... .... .... .... .... .... .... .... .... .... |     |     |     |     |     |
| MN851302 | TATAGAGCCATCAAATAGTCCCTGGAACACACCCATATTTGTAATAAGAAAGAAATCAGGCAAT                |     |     |     |     |     |
| MEMT001  | TATAGAGCCATCAAATAGTCCCTGGAACACACCCATATTTGTAATAAGAAAGAAATCAGGCAA                 |     |     |     |     |     |
| MEMT002  | TATAGAGCCATCAAATAGTCCCTGGAACACACCCATATTTGTAATAAGAAAGAAATCAGGCAA-                |     |     |     |     |     |
| MEMT003  | TATAGAGCCATCAAATAGTCCCTGGAACACACCCATATTTGTAATAAGAAAGAAATCAGGCAA-                |     |     |     |     |     |
| MEMT004  | TATAGAGCCATCAAATAGTCCCTGGAACACACCCATATTTGTAATAAGAAAGAAATCAGGCAA-                |     |     |     |     |     |
| MEMT005  | TATAGAGCCATCAAATAGTCCCTGGAACACACCCATATTTGTAATAAGAAAGAAATCAGGCAA-                |     |     |     |     |     |
| MEMT006  | -----                                                                           |     |     |     |     |     |
| MEMT007  | TATAGAGCCATCAAATAGTCCCTGGAACACACCCATATTTGTAATAAGAAAGAAATCAGGCAA-                |     |     |     |     |     |
| MEMT008  | TATAGAGCCATCAAATAGTCCCTGGAACACACCCATATTTGTAATAAGAAAGAAATCAGGCAA-                |     |     |     |     |     |
| MEMT009  | TATAGAGCCATCAAATAGTCCCTGGAACACACCCATATTTGTAATAAGAAAG-----                       |     |     |     |     |     |

## B: MN851303. Myotis daubentonii endogenous retrovirus isolate EuB-RV3

|          |                                                                                                       |     |     |     |     |     |     |     |     |     |
|----------|-------------------------------------------------------------------------------------------------------|-----|-----|-----|-----|-----|-----|-----|-----|-----|
|          | 10                                                                                                    | 20  | 30  | 40  | 50  | 60  | 70  | 80  | 90  | 100 |
|          | .... .... .... .... .... .... .... .... .... .... .... .... .... .... .... ....                       |     |     |     |     |     |     |     |     |     |
| MN851303 | GCCCTCAATTATTTTCATTTTGATGAGCATGGATTAAACCCCTATGTATAAACATTGGGGAGGACTCCGGGACATAGCAACACCTCTTCCCTTGGTCCGGT |     |     |     |     |     |     |     |     |     |
| MEMT007  | -----AAACATTGGGGAGGTCTCAGGGACATACCAACACCTCTCCCTTGGTCCGGT                                              |     |     |     |     |     |     |     |     |     |
|          | 110                                                                                                   | 120 | 130 | 140 | 150 | 160 | 170 | 180 | 190 | 200 |
|          | .... .... .... .... .... .... .... .... .... .... .... .... .... .... .... ....                       |     |     |     |     |     |     |     |     |     |
| MN851303 | GGAGAGACCCACTTACCGAAGCCTGGAAGGCCCCGACCCACTCTTAACCCAGGGGAGAGGGTTTGCTTGTTATTTTTCCAGAAGCGCAAAAGTCCCGC    |     |     |     |     |     |     |     |     |     |
| MEMT007  | GGAGAGATCCACTAACCGGGGCTTGAAAGGGCCCCGACCCACTCTTAACCCAGGGGAGAGGGTTTGCTTGTTATTTTTCCAGAAGATGAGAAAAATCCCGC |     |     |     |     |     |     |     |     |     |
|          | 210                                                                                                   | 220 | 230 | 240 |     |     |     |     |     |     |
|          | .... .... .... .... .... .... .... .... .... .... .... .... .... .... .... ....                       |     |     |     |     |     |     |     |     |     |
| MN851303 | ATGGATCCCTGCTCGTGACATCAAACCCACACACCAGCGATGAGCCG                                                       |     |     |     |     |     |     |     |     |     |
| MEMT007  | TTGGATTCTACCCGTAACATCAAACCCTGCAACCACAGTGATGACCCG                                                      |     |     |     |     |     |     |     |     |     |

## C: JQ292912. Myotis ricketti retrovirus isolate MrRV

|          |                                                                                                        |     |     |     |     |     |     |     |     |     |
|----------|--------------------------------------------------------------------------------------------------------|-----|-----|-----|-----|-----|-----|-----|-----|-----|
|          | 310                                                                                                    | 320 | 330 | 340 | 350 | 360 | 370 | 380 | 390 | 400 |
|          | .... .... .... .... .... .... .... .... .... .... .... .... .... .... .... ....                        |     |     |     |     |     |     |     |     |     |
| JQ292912 | GAGACAGAAGAAATTGCCTTTAATCAGATAAAGAAAGCTCTTTTGGCTGCTCCAGCCCTGGGCCTACCAGACATTACAAAACCCCTTTCGCCCTCTTTGTAG |     |     |     |     |     |     |     |     |     |
| MEMT001  | -----CTCCAGCCCTGGGCCTACCAGACATTACAAAACCCCTTTCGCCCTCTTTGTAG                                             |     |     |     |     |     |     |     |     |     |
|          | 410                                                                                                    | 420 | 430 | 440 | 450 | 460 | 470 | 480 | 490 | 500 |
|          | .... .... .... .... .... .... .... .... .... .... .... .... .... .... .... ....                        |     |     |     |     |     |     |     |     |     |
| JQ292912 | ACGAGCGCAAAGGAGTAGCAAAAGGAGTTTAAACCCAGGCTTTAGGCCCTTGAGTCGCCAGTAGCATATTTGTCTAAAAAGCTGGATCCCGTAGCTGC     |     |     |     |     |     |     |     |     |     |
| MEMT001  | ATGAGTGCAAAATGAGTAGCAAGAGGGGTTTAAACCCAGGCTTTAGGCCCTTGAGTCGCCAGTAGCATATTTGTCTAAAAAGCTGGATCCTGTAGCTGC    |     |     |     |     |     |     |     |     |     |

510 520 530 540 550 560 570 580 590 600

JQ292912  
MEMT001

CGGCCTGGCCACCGTGCCTAAGAATCATTGCAGCAACTGCGCTCTTAGTCAAGGATGCCGACAAACTAACCCCTGGGACAGGAGATCTGGATCACAACCCCG  
CGGCCTGGCCACCGTGCCTAAGAATCGTTGCAGCAACCGCGCTCTTAGTCAAGGATGCCAACAACCTGACCCCTGGGACAGGAGATATGGATCACAACACCG

610 620 630 640 650 660 670 680

JQ292912  
MEMT001

CATGCCATTGAGGGGGTCCATAAAGCAGCCTCGTAGATGGAATGAGCAATGCTCGCATGACCCACTATCAAAGCTTGCTGCTC  
CATGCCATTGAGGGGGTCCATAAAGCAGCCTCCTAATAGGTGGATGAGCAATGCTCG-----
