# Supplementary material for: A Novel Coronavirus and a Broad Range of Viruses in Kenyan Cave Bats
Source: MDPI journal article supplement (doi:10.3390/v14122820), 2022-12-17
Supplement: s1 [file s1]

**Supplementary Figure S10:** Alignment of the Actinidia yellowing virus 2 (A), *Rhopalosiphum padi virus* (B), Bole tick virus 4 (C), Bat herpesvirus (D) and Cyclovirus (E) sequences identified in bat samples. Positions are numbered according to the reference sequence in each alignment

**A: MN180071. Actinidia yellowing virus 2 isolate AYV2-Zhouzhi**

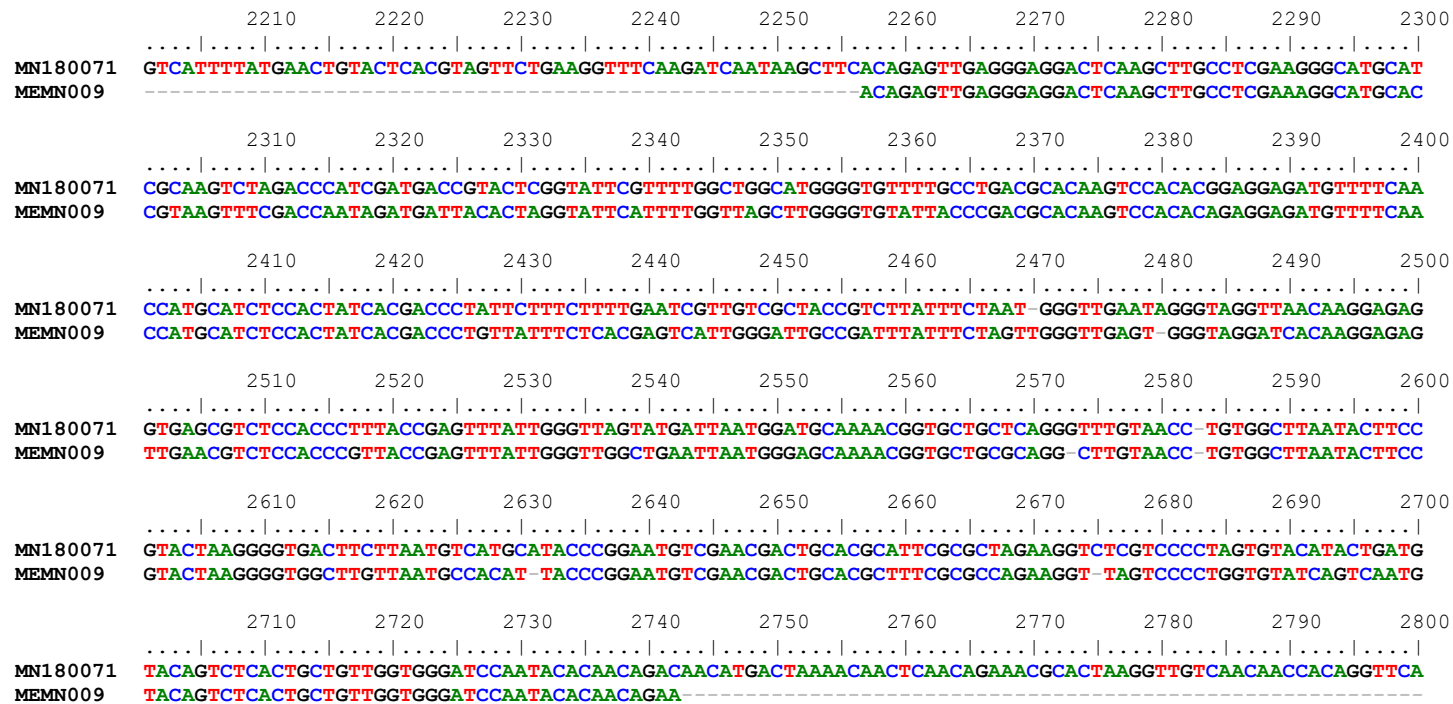

**B: MN535735. Rhopalosiphum padi virus isolate RhPV/OV-157/M.dau/DK/2018**

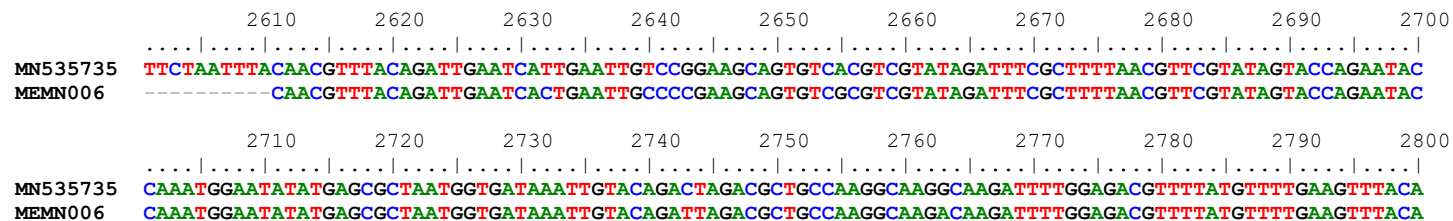

|          |                                                                                                     |      |      |      |      |      |      |      |      |      |
|----------|-----------------------------------------------------------------------------------------------------|------|------|------|------|------|------|------|------|------|
|          | 2810                                                                                                | 2820 | 2830 | 2840 | 2850 | 2860 | 2870 | 2880 | 2890 | 2900 |
|          | ..... ..... ..... ..... ..... ..... ..... ..... ..... ..... .....                                   |      |      |      |      |      |      |      |      |      |
| MN535735 | GATTTGATTATTTTACGCTTCTAGCCGTCGCAACGTTTTGACTGATTTAACTTACACGGAAGTTGTGAAGTTGTGTCAGGATAAGATGCGCGATCGCGC |      |      |      |      |      |      |      |      |      |
| MEMN006  | GGTTTGATTATTTGATGCCCTCTAGCCGTCGCAATATTTTACTGATTTAACTTACACGGAAGTTGTGAAGTTGTGTCAG-----                |      |      |      |      |      |      |      |      |      |

### C: MW561976. Bole tick virus 4 strain Ifin/H.dromedarii/2018

|          |                                                                                                        |      |      |      |      |      |      |      |      |      |
|----------|--------------------------------------------------------------------------------------------------------|------|------|------|------|------|------|------|------|------|
|          | 5010                                                                                                   | 5020 | 5030 | 5040 | 5050 | 5060 | 5070 | 5080 | 5090 | 5100 |
|          | ..... ..... ..... ..... ..... ..... ..... ..... ..... ..... .....                                      |      |      |      |      |      |      |      |      |      |
| MW561976 | CCGCCGCATCGCTATGGCTGGCATCTATGGGGAAGATGAACCTTCAGCCTGGCGGAGATGAAGACACTCTCGCGGTCCGAGGGGCCCTGGCCGCCCTTCACC |      |      |      |      |      |      |      |      |      |
| SYMA004  | -----CCGCCGAGATGAAGACACTCTCGCGGTCCGAGGGGCCCTGGCCGCCCTTCACC                                             |      |      |      |      |      |      |      |      |      |
|          | 5110                                                                                                   | 5120 | 5130 | 5140 | 5150 | 5160 | 5170 | 5180 | 5190 | 5200 |
|          | ..... ..... ..... ..... ..... ..... ..... ..... ..... ..... .....                                      |      |      |      |      |      |      |      |      |      |
| MW561976 | ACCAGGAAGAGCGCGCCTTACTTTGGGGGCTAGTGTTCGACATCGGATTCCACGCTCCATCGCCGCAAAGATCGGCTTCGACGGTTTCTTTAAGGACGCCG  |      |      |      |      |      |      |      |      |      |
| SYMA004  | ACCAGGAAGAGTGCGCCCTTACTTTGGGGGCTAGTGTTCGACATCGGATTCCACGCTCCATCGCCGCAAAGATCGGCTTCGACGGTTTCTTTAAGGACGCCG |      |      |      |      |      |      |      |      |      |
|          | 5210                                                                                                   | 5220 | 5230 | 5240 | 5250 | 5260 | 5270 | 5280 | 5290 | 5300 |
|          | ..... ..... ..... ..... ..... ..... ..... ..... ..... ..... .....                                      |      |      |      |      |      |      |      |      |      |
| MW561976 | ACATCAACTTTGCGGCCCCAGCTATCTTCCAGATGCAGACCAACACGGGTTGCACGAACACGGGTTTCTGCTTCCAACACCGCGGAGCCGTGTTCAAAA    |      |      |      |      |      |      |      |      |      |
| SYMA004  | ACATCAACTTTGCGGCCCCAGCTATCTTCCAGATGCAGACCAACACGGGTTGCACGAACACGGGTTTCTGCTTCCAACACCGCGGAGCCGTGTTCAAAA    |      |      |      |      |      |      |      |      |      |
|          | 5310                                                                                                   | 5320 | 5330 | 5340 | 5350 | 5360 | 5370 | 5380 | 5390 | 5400 |
|          | ..... ..... ..... ..... ..... ..... ..... ..... ..... ..... .....                                      |      |      |      |      |      |      |      |      |      |
| MW561976 | TTACCACGTCACAGAGGGCAGACCCCTCATCCTCCCGACC GTGTTCCAACGAGGGCAAGGTGGATTACTCGCTGATCCGCTGCGTCTTCAAGAATGAGAAA |      |      |      |      |      |      |      |      |      |
| SYMA004  | TTACCACGTCACAGAGGGCAGACCCCTCATCCTCCCGACC-----                                                          |      |      |      |      |      |      |      |      |      |

### D: JQ805139. Bat betaherpesvirus B7D8

|          |                                                                                                        |     |     |     |     |     |     |     |     |     |
|----------|--------------------------------------------------------------------------------------------------------|-----|-----|-----|-----|-----|-----|-----|-----|-----|
|          | 10                                                                                                     | 20  | 30  | 40  | 50  | 60  | 70  | 80  | 90  | 100 |
|          | ..... ..... ..... ..... ..... ..... ..... ..... ..... ..... .....                                      |     |     |     |     |     |     |     |     |     |
| JQ805139 | GACACGATAGCGAGTTTATACATCACCGGCGGCGGCGGAACGGTTCATGACGCGTCGGCCGAAACGTGCATCAGAACCGTCCTGGGATGCTATTGGCAGAG  |     |     |     |     |     |     |     |     |     |
| SYMA008  | GACACGATAGCGAATTTTATATAACCGGCGGCGGCGGGAACGCTCACGACGCGTCGGCCGAAACGTGTGTCGGGACCGCTTTCGAGTGTTACTGGCGGAG   |     |     |     |     |     |     |     |     |     |
|          | 110                                                                                                    | 120 | 130 | 140 | 150 | 160 | 170 | 180 | 190 | 200 |
|          | ..... ..... ..... ..... ..... ..... ..... ..... ..... ..... .....                                      |     |     |     |     |     |     |     |     |     |
| JQ805139 | GTTGTTCGGGGCGTCTGCGGGAAGCCCTGCGTGTCTCAGTTGGACAGCGGTATGAGCGTGTGCTGGTGTCGGATTGTCGGGTGATCAGTTCGTTTCAGA    |     |     |     |     |     |     |     |     |     |
| SYMA008  | GTTGTTCGGGGGGCTGGACGGAAGCCCGACGTGCTCTCTGCTCGACAGCCACAGGAGCGTGTGCTGGTGTCGGACTGTGCGGACGATCAGCTCGTTCAGA   |     |     |     |     |     |     |     |     |     |
|          | 210                                                                                                    | 220 | 230 | 240 | 250 | 260 | 270 | 280 | 290 | 300 |
|          | ..... ..... ..... ..... ..... ..... ..... ..... ..... ..... .....                                      |     |     |     |     |     |     |     |     |     |
| JQ805139 | TCCGTGTTTGCACGCGACGGAGACGCTCACTGGACGTGCGTTATGGGCGATGCGATCTCGGACACGCTCTCTAGATGTACGCGCGACCCAGATTGGTTCG   |     |     |     |     |     |     |     |     |     |
| SYMA008  | TCGGCGTTTGCACGCGCACAGGGAACGCACTGGACGTGCGTTCATGGGTGATGCGGATGTGCGGACATCCTTTCTAGATGTACACCGACCCGGAATGGTTCG |     |     |     |     |     |     |     |     |     |
|          | 310                                                                                                    | 320 | 330 | 340 | 350 | 360 | 370 | 380 |     |     |
|          | ..... ..... ..... ..... ..... ..... ..... ..... ..... ..... .....                                      |     |     |     |     |     |     |     |     |     |
| JQ805139 | GAGCGGAAAAATATAAAAAGCGTGTACGATCGTTGTTTTTTAAGTTTATAAGCATGAGACATAGACCGGAATTTTGGTTGG                      |     |     |     |     |     |     |     |     |     |
| SYMA008  | GGTCCGAAAAATATAAAAACGTGTACGATCCCTATTTTTTTAAGTTTATAGCTATGAGACACCGGCGGGAGTTCTGGTTGG                      |     |     |     |     |     |     |     |     |     |

## E: AB937982. Cyclovirus ZM36a, AB937980. Cyclovirus ZM32

```

      810      820      830      840      850      860      870      880      890      900
AB937982  ....|....|....|....|....|....|....|....|....|....|....|....|....|
AB937980  CCAGAAATAAAATAAAATGT-----TTCAATTCAAAATGTATTTCTTTATTCAATCTCCTCCTTAAACTACTACAATCATACGCTAAAAATCTATACACCT
SYM011    -----TTTCCTTTATTCAACCTTCTCCTCAAACACTACTACAATCATAGCTAAGAACTCTGTACACTT

      910      920      930      940      950      960      970      980      990     1000
AB937982  CCTCTAGAGGTCTTTCGCTTGTGATCCATATATATTTAGATACGAAGTTTTCATATCCTCCTTTGACAGGGACTCTGTAAGGATATCTGTTCGAGATCTT
AB937980  CCTCTAGAGGTCTTTCGCTTGTGATCCATATATATTTAGATACGAAGTTTTCATATCCTCCTTTGACAGGGACTCGATAAGGATATCTGTTCGAGATCTT
SYM011    CCTCTAGAGGTCTGTTCACTTGTGATCCATATATATTTAGATACGAAGTTTTCATATCCTCCTTTGACAGGGACTCTGTAAGGATATCTGTTCGAGATCTT

      1010     1020     1030     1040     1050     1060     1070     1080     1090     1100
AB937982  GAGAAGCTCGTCGTATTTGATCCATCCGTAGAAGTCATCGATAACAACGCAGGGTTGTCCGGTGTATCCATCCCACCATTTCCCGCGCGGCTTGTAGTAG
AB937980  GAGAAGCTCATCGTATTTAATCCATCCGTAGAAGTCATCGATAACAACGCACGGTTGTCCGGTGTATCCATCCCACCATTTCCCGCGCGGCTTGTAGTAG
SYM011    GAGAAGCTCATCGTACTTGTATCCATCCGTAGAAGTCATCGATAACAACGCAGGGTTGTCCGGTGTATCCATCCCACCATTTCCCGTGGTTTGTAGTAG

      1110     1120     1130     1140     1150     1160     1170     1180     1190     1200
AB937982  GTTTCACCGAGAGCGCGGCTTTCCCTCGCGCGCTTTCACGGGACTTTCCAGTTCAGTTGATCCCCAAAAGTAAAAGACTTCGTTTTAAAGTCTCGTTCTT
AB937980  GTGTCACCAAGAGCGCGGCTTTCTTCGCGCGCTTTCACGGGACTTTCCCTGTTCCAGTCGCTCCCCAAAAGTAAAAGACTTCGTTTTAAAGTCTCGTTCTG
SYM011    GTTTCACCGAGAGCAGGACTTTCTTCGCGCGCTTTCACGGGACTTTCCAGTTCAGTCCGTCCTCCAAAAGTAAAAGACTTCGTTTTAAAGTCTCGTTCTT

      1210     1220     1230     1240     1250     1260     1270     1280     1290     1300
AB937982  GATTTCCATGAGCGACTCTAATGTATTGTTCAATTCTTTGAAATACTTGATGTACGCGACTGGGAACCTGAATGGCCAAAGCTTTAATGTCTCTTCTCC
AB937980  GATTTCCATGAGCGATTCTAATGTATTGTTCAATTCCCTTGAAATACTTGATATACGCTGTGGGAACCTGAAGGGCCAGGTTTTTAATGTCTTCTCTCC
SYM011    GATTTCCATGAGCGATTCTAATGTATTGTTCAATTCTTTGTAATACTTGATATACGCGACTGGGAACCTGAAGGGCCAAAGTTTTAAGGTCTCTCTCTCC

      1310     1320     1330     1340     1350     1360     1370     1380     1390     1400
AB937982  TCCTTCAATGACAGATACAACCTTTTGGAGGTCTGTTTCGAGTTCCTTGAGTACTGGGTGATCCGCATTGCCAGACATCGCCACTCTTAGAGCAATATTCC
AB937980  TCCTTCAATGACAGAAACAACCTTTTGGAGGTCTGTTCTAGTTCCTTGAGTACTGGGTGATCCACATTGCCATACATCGCCACCTTTAGAGCAGTATTCC
SYM011    TCCTTCAATGACAGAAACAACCTTTTGGAGGTCTGTTCTAGTTCCTTGAGCACTGGGCTCTCCGCATTCCCAGACATCGCCACTCTTAGAGCAATATTCC

      1410     1420     1430     1440     1450     1460     1470     1480     1490     1500
AB937982  TGATTTTCAATATCACTCCCTTTAGCTCGCTCAATGTGCGCACGGCCTCCAAATATTTGCCGTATGCTGTTGAATCGTTTGGGTTCGCTGCAGATTGCTGA
AB937980  TGATTTTCGAGATCACTTCCCTTTAGCTCTTTCAATGTGCGCTCGTCCGCCAAATATTTGCGTATGCTGTTAAATCTTTTGGGTTCGCTGCAAAATGCTGT
SYM011    TTATTTTCGAGATCAGTTCCTTTAGCTCTTTCAATGTGCGCTCTACCTCCAAATATTTTCCGAATGCTGTTGAATCGTTTGGGTTCGCTGCAGATTGCTGT

      1510     1520     1530     1540     1550     1560     1570     1580     1590     1600
AB937982  AAATAAAATCAATAAGTCGT-ACACTATGCACGGAGCCCCGCCGCGAGAGGGGTGGACGGGGCCCCGGCGGGCGTAGCCGCGCCAGGGGGTGGTCCACC
AB937980  AATAGAACAACCATATGTTACGACACTATGTCGGAGCCCCGCCGCGAGAGAGGGGGGGGGGGCCCCCGCGCGCCGAGGCGCGCGTAGGGGTGCCCC-CC
SYM011    AATACAACACGATAAATTAATATCTAATTCTCGGAGCCCCGCCGCGAGAGAGGGGGGGGGGGCCCCCGCGGGCGTAGCCGCGCGTAGGGGTGCCCC-CC
```

```

      1610      1620      1630      1640      1650      1660      1670      1680      1690      1700
AB937982  ....|....|....|....|....|....|....|....|....|....|....|....|....|....|....|
AB937980  CCGGAGCGGGATCGGGCGGCTCTATCCAACGTGACTTTCCACTTGCA-CTAGGAGGTTATATAAAAAA--ATTACCAAAATCCCTGGAGATGTTTGT
SYMN011   TCGGCGCGGGATCGGGCGGTTCTATCCAACGTGAGACTATCCAACTGAAACAAGGAGGTTATATT-----TACCAAAATCCCTGGAGATGTTTGT

      1710      1720      1730      1740      1750      1760      1770      1780      1790      1800
AB937982  ....|....|....|....|....|....|....|....|....|....|....|....|....|....|....|
AB937980  TCCAGTTGTAGGACAAATCTCTCGACCAAAATATAGCAAAATTACATAGCTCAGCGAGGTCCTTCTGAAGCACATCGACATCGTCCCTCCGTATAATTATTC
SYMN011   TCCAGTACTAGGACATGTCTCTCGACCAAAATATAGCAAAATTACAAAGCTCAGCGAGGTCCTTCTGAAGCACATCGACATCCTCGTCGGTATAGTTATTC

      1810      1820      1830      1840      1850      1860      1870      1880      1890
AB937982  ....|....|....|....|....|....|....|....|....|....|....|....|....|....|....|
AB937980  AGCGTCCAGCAGAAATCTACGCACGTGCTGTGTGTTAGCCATAATGATGAGACCGAGCGTTACAGCGCCT-ATATATAACAACGAAGTGGCGGTA
SYMN011   AGCGTCCAGCAGAAATCTTCGAGCGTGTGTTTTTAGCCATAATGGTGAGACCGAGCGTTACAACGTTGCTTATAAACTCCCAGAGTGGCGGTA
```
