# Supplementary material for: A Novel Coronavirus and a Broad Range of Viruses in Kenyan Cave Bats
Source: MDPI journal article supplement (doi:10.3390/v14122820), 2022-12-17
Supplement: s1 [file s1]

**Supplementary Figure S9:** Alignment of the astrovirus sequences detected in bats. Positions are indicated according to the bat astrovirus isolate BtAstV/21164-6-A/M.dau/DK/2015 (KF313135). GenBank accessions for sequences obtained in SYMN012 and SYMA008 are ON893139 and ON893140.

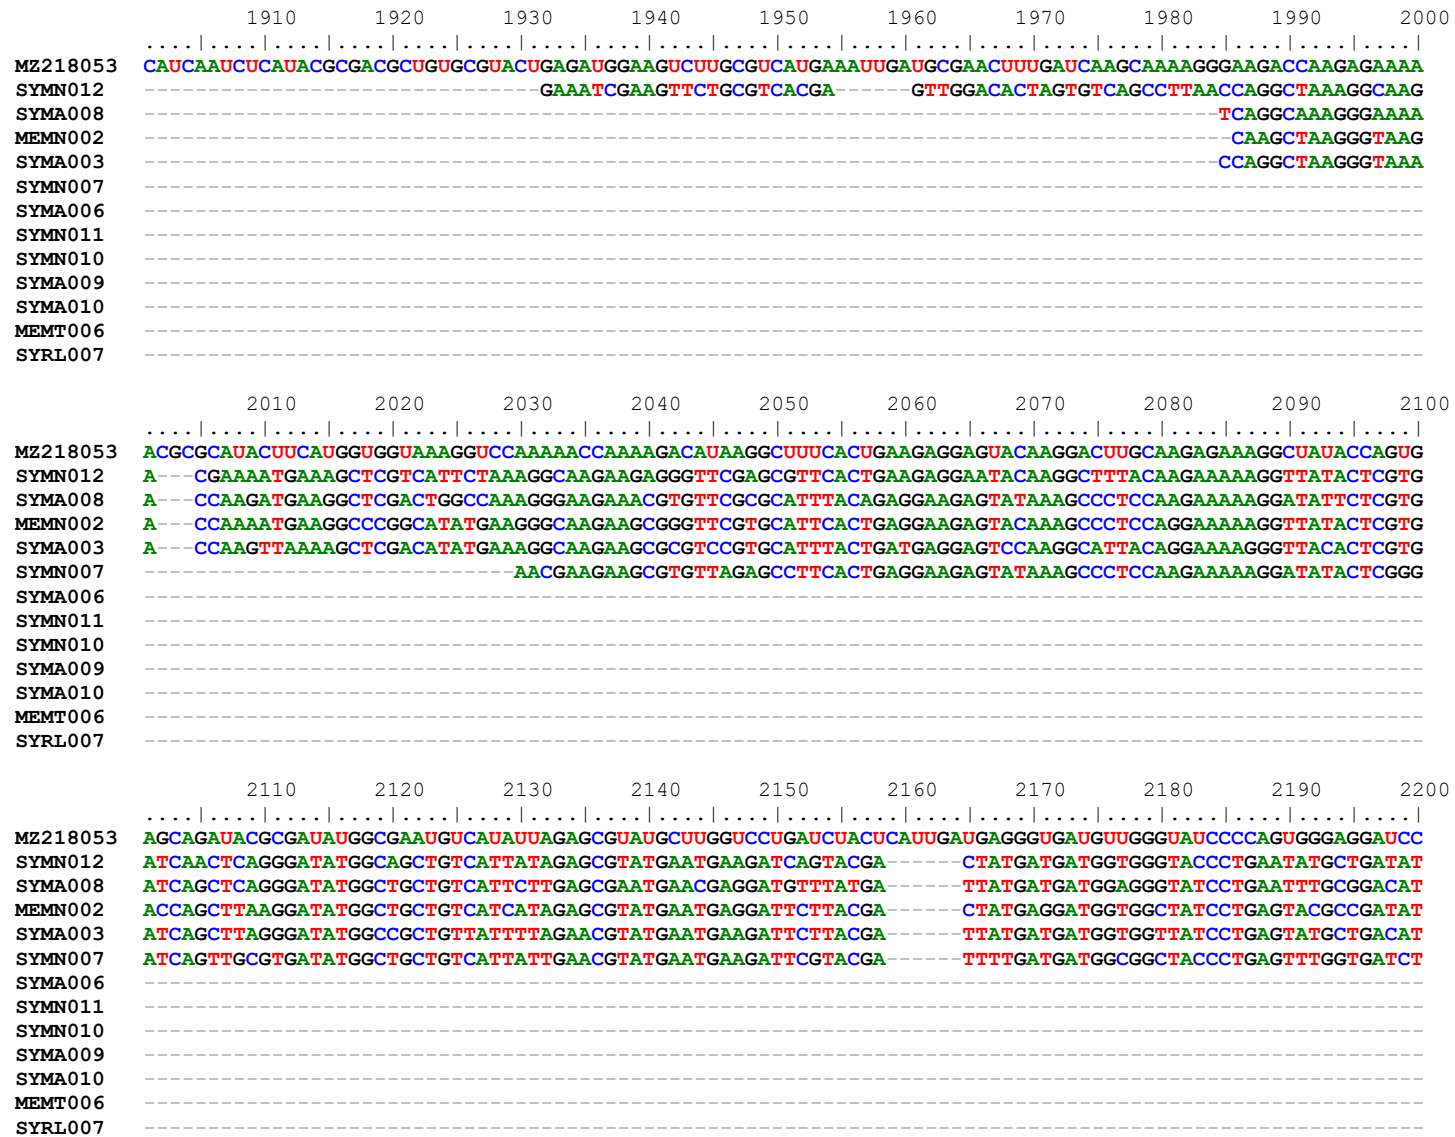







|          |                                                                                                         |      |      |      |      |      |      |      |      |      |
|----------|---------------------------------------------------------------------------------------------------------|------|------|------|------|------|------|------|------|------|
|          | 3110                                                                                                    | 3120 | 3130 | 3140 | 3150 | 3160 | 3170 | 3180 | 3190 | 3200 |
|          | .... .... .... .... .... .... .... .... .... .... .... .... .... .... ....                              |      |      |      |      |      |      |      |      |      |
| MZ218053 | GAAAGCACACCUUGGUUACCUAAGUUUCGUACUGGAAGACUGAGGUGAGUAUUUAGAGGAUAGAGGCUUCUGUGACUACAUCCAACAGCUUGAUUGAAU     |      |      |      |      |      |      |      |      |      |
| SYMN012  | GATTCTACTCCTGCGTTTCCAAAAATTCCTTTTCTGGCGCACAGAGGAGGAATATTTGGAAGATCGTGGGTATGCTGATTACATCAAGCAGTATAATGACA   |      |      |      |      |      |      |      |      |      |
| SYMA008  | GATTCTACCCCTGCTTTTCCGAAGTTCCTCTATTGGAAAACTGAAGAGGAGTATTTGGAGGAAAGGGGGTATGCTGATTACATTCAACAAATACAACGATT   |      |      |      |      |      |      |      |      |      |
| MEMN002  | GATTCAACTCCTGCTTTTCCTAATTTCTCTTCTGGCGTACAGAGGAGGAATATTTGGAGGAGCGTGGGTATGCTGATTATATTAACAGTATAATGATA      |      |      |      |      |      |      |      |      |      |
| SYMA003  | GATTCTACTCCTGCTTTTCCTAAGTTCCTTTTCTGGCGTACTGAAGAGGAGTATTTGGATGAGCGTGGTTATGCTGATTATATCCAGCAGTACAATGATA    |      |      |      |      |      |      |      |      |      |
| SYMN007  | CAATCTACACCAGCCTTTCCAAAAATTCCTTTTCTGGAAAAACGGAAGAGGAGTATTTGGAAGAACGTGGTTATGCTGATTACATACAGCAGTATAATGACA  |      |      |      |      |      |      |      |      |      |
| SYMA006  | GATTCTACTCCTGCTTTTCCGAAGTTCCTCTATTGGAAAACTGAAGAGGAGTATTTGGAGGAGCGTGGGTATGCTGATTATATACAGCAGTATAATGATA    |      |      |      |      |      |      |      |      |      |
| SYMN011  | GATTCCACACCTGGCTTTCCAAAAATTCCTCTTTTGGAAAGCTGAGGAGGAGTATTTGGATGAGCGGGGTTATGCTGATTATATTC AACAGTATAATGACA  |      |      |      |      |      |      |      |      |      |
| SYMN010  | GATTCCACTCCCGCATTTCCGAAGTTCCTTTTTTGGCGTACGGAAGAGGAGTATTTGGATGATCGTGGTTATGCTGATTATATTAGTCAGTATAATGACA    |      |      |      |      |      |      |      |      |      |
| SYMA009  | GATTCCACACCTGGCTTTCCAAAAATTCCTCTTTTGGAAAGCTGAGGAGGAGTACTTTGGATGAGCGGGGTTATGCTGATTATATTC AACAGTATAATGACA |      |      |      |      |      |      |      |      |      |
| SYMA010  | GATTCTACACCTGCTTTTCCTAAGTTCCTCTTCTGGCGTACTGAGGAGGAATATTTGGAGGAGCGTGGGTATGGTGATTATATTCAGCAGTTC AATGATA   |      |      |      |      |      |      |      |      |      |
| MEMT006  | -----                                                                                                   |      |      |      |      |      |      |      |      |      |
| SYRL007  | -----                                                                                                   |      |      |      |      |      |      |      |      |      |

|          |                                                                                                                 |      |      |      |      |      |      |      |      |      |
|----------|-----------------------------------------------------------------------------------------------------------------|------|------|------|------|------|------|------|------|------|
|          | 3210                                                                                                            | 3220 | 3230 | 3240 | 3250 | 3260 | 3270 | 3280 | 3290 | 3300 |
|          | .... .... .... .... .... .... .... .... .... .... .... .... .... .... ....                                      |      |      |      |      |      |      |      |      |      |
| MZ218053 | UGAAAAAUGGUUCUAGACCCGACGUGCUGUGGUUAUUUAUUUUAAGAAAGAAAUUCUUAAGGUGAUAAGGUCGAAGCUGGUGACAUAUCGUCAAAUUCGU            |      |      |      |      |      |      |      |      |      |
| SYMN012  | TTTGTGATGGTGAAAGACCCGATGTATTGTGGTACTTATTTTAAAGAAAGAGATCTTGAAAGATTGATAAAATTAAGATTCCGATATAAGGCAAATTGT             |      |      |      |      |      |      |      |      |      |
| SYMA008  | TGGTTGCTGGTGAAAGCCCGATGTCCTTTGGTATCTCTTCTTGAAGAGGAGATTTTAAACCTGGATAAAATTAAGATTGAGATATCCGTCAGATAGT               |      |      |      |      |      |      |      |      |      |
| MEMN002  | TACTTGGTGGGAAAGGCCGTGATGTCTCTCTCTCTTTTGAAGGAGGAGTCTCTTTTGAAGGAGGAGTCTTAGGTTGGATAAGATAAAAGACTCAGATATTAGGCAAATAGT |      |      |      |      |      |      |      |      |      |
| SYMA003  | TTGGTAATGGTGAAAGACCTGATGTTTTGTGGTATCTTTTTCTTAAAGAGGAGATCTTAGGTTGGATAAGATAAAAGACTCAGATATTAGGCAAATAGT             |      |      |      |      |      |      |      |      |      |
| SYMN007  | TTGTGGCTGGTGAGCGTCCAGATGTCCTTTGGTACCTCTTCTTGAAGAGGAGATCTTAAAGTTGGAAGAAATTTGATCAGTCTGATATTCGGCAAATAGT            |      |      |      |      |      |      |      |      |      |
| SYMA006  | TTGTTGCTGGTGAGCGACCTGATGTTTTTGGTATCTTTTCTTGAAGAGGAGGATCTGAGTTGGATAAAATTAAGATTGAGATATTCGTCAAATAGT                |      |      |      |      |      |      |      |      |      |
| SYMN011  | TAGTTGCGGGTGAGAGACCAAGTCCGTGTTGTTCTCTTTTGAAGAAAGAAATCTTAAATTTGGAAGGAGATTGAGGAAATCTGATATCCGTCAAATAGT             |      |      |      |      |      |      |      |      |      |
| SYMN010  | TTGTCAATGGTGAGCGTCCCGATGTTTTGTGGTATTTATTTTAAAGAGGAGATCTTAAAGTTAGATAAGATCAAGGATTCTGATATAAGGCAAGATCGT             |      |      |      |      |      |      |      |      |      |
| SYMA009  | TAGTTGCGGGTGAGAGACCAAGTCCGTGTTGTTCTCTTTTGAAGAAAGAAATCTTAAATTTGGAAGGAGATTGAGGAAATCTGATATCCGTCAAATAGT             |      |      |      |      |      |      |      |      |      |
| SYMA010  | TAGTTGCGGGTGAGAGACCTAATGTTTTGTGGTACCTTTTCTTAAAGAGGAGATCTTAAAGTTGGAAGGATCAAGGAAATCTGATATTAGGCAAATTTG             |      |      |      |      |      |      |      |      |      |
| MEMT006  | -----AGATTGT                                                                                                    |      |      |      |      |      |      |      |      |      |
| SYRL007  | -----                                                                                                           |      |      |      |      |      |      |      |      |      |

|          |                                                                                                          |      |      |      |      |      |      |      |      |      |
|----------|----------------------------------------------------------------------------------------------------------|------|------|------|------|------|------|------|------|------|
|          | 3310                                                                                                     | 3320 | 3330 | 3340 | 3350 | 3360 | 3370 | 3380 | 3390 | 3400 |
|          | .... .... .... .... .... .... .... .... .... .... .... .... .... .... ....                               |      |      |      |      |      |      |      |      |      |
| MZ218053 | UUGUCCCGACCCUAUCUAGCAGCUGUCGGAGCGAUUUCGAGCAAGAUCAAGAAAUUGAUAAGGAGATGACCAAGUGGAAACAUUGGCCAAUUGGGA         |      |      |      |      |      |      |      |      |      |
| SYMN012  | GTGTCCTGACCCATATATTTCCAGGATTGGTGCCATGTTTGAGCAAGATCAGAAATAACCGTATGAAGGATATGACCCGATGGCGGCAATCTCAGTGTGGA    |      |      |      |      |      |      |      |      |      |
| SYMA008  | GTGTTCAGATCCAAATTTTGGCCGTATTGGTGCTATGTTTGAGCAAGATCAAAACAACCGTATGAAGGAGATGACCCGCTGGCGACAAGGTCAGTGTGGT     |      |      |      |      |      |      |      |      |      |
| MEMN002  | -----                                                                                                    |      |      |      |      |      |      |      |      |      |
| SYMA003  | GTGTCCTGACCCCATATTTTCTAGGATTGGTGCCATGTATGAACAAGATCAAAATAATCGTATGAAGGAGATGACAAGATGGAGGCAGTCCCAGTGTGGT     |      |      |      |      |      |      |      |      |      |
| SYMN007  | GTGTCAGACCCATATTTATAGTCGGATTGGGGCTATGTTTGAAACAAGACCAAGAAACCAACCGAATGAAGAGTATGACGCGGTGGAAACAATCACAATGTGGT |      |      |      |      |      |      |      |      |      |
| SYMA006  | TTGTGCAGATCCAAATTTATGCTCGTATTGGTGCTATGTACGAGCAAGATCAAAATAACCGTATGAAGGAGATGACCCGTTGGCGTCAAGGTC AATGTGGG   |      |      |      |      |      |      |      |      |      |
| SYMN011  | GTGTTCAGACCCCAATATATGCTCGTATTGGAGCAATGTATGA                                                              |      |      |      |      |      |      |      |      |      |
| SYMN010  | TTGTCTGTATCCTATTTTTTCTAGAATTGGTGCCATGTTTGAGCAAGATCAAAATAATCGGATGAAAAGTATGACACGGTGGAGGCAATCTCAGTGTGGT     |      |      |      |      |      |      |      |      |      |
| SYMA009  | GTGTTCAGACCCCAATATATGCTCGTATTGGAGCAATGTATGAGCAAGATCAGAAATAATCGGATGAAGGAGATGACCCGTTGGCGTCAAGGCCAATGTGGT   |      |      |      |      |      |      |      |      |      |
| SYMA010  | GTGTCCTGTATCCTATTTTTCTCTCGTATTGGTGCCATGTATGAACAAGATCAGAAATAACCGGATGAAGGACATGACAAGGTGGCGTCAGTCACAGTGTGGA  |      |      |      |      |      |      |      |      |      |
| MEMT006  | GTGTCCTGTATCCCAATCTATGCTAGGATAGGTGCCATGTTTGAGCAAGATCAGAAATAACAGGATGAAGAACATGACAAGGTGGAAACATGGACAGTGTGGT  |      |      |      |      |      |      |      |      |      |
| SYRL007  | -----                                                                                                    |      |      |      |      |      |      |      |      |      |

```

      3410      3420      3430      3440      3450      3460      3470      3480      3490      3500
....|....|....|....|....|....|....|....|....|....|....|....|....|....|....|
MZ218053 UGGUCACCCUUUGAGGGUGGCUUUGAUGAGGUUCUUCGCCGCCUCGAGCGUGAUGACAATCAGUACAUGAGUUGGAUUGGACUCGGUAUGAUGGUACUA
SYMN012 TGGTCGCCTTTTGAAGGTGGCTTCCATGAGGTTATTTCTAGGTTAGACCGTAGTGGTCATACCTATATCGAGTTGCGATTGGACTCGTTATGATGGCACCA
SYMA008 TGGTCCCCCTTTGAAGGTGGCTTTTCATCATGCCATTTACGCGTTGGAACGTAAAGGCAATGTTTACATAGAGTTTGATTGGACTCGCTATGATGGAACATA
MEMN002
SYMA003 TGGTCTCCGTTTGAAGGTGGTTTCCATGATGTCAATTTCTAGGTTAGAGCGTGATGGTAATACATACATAGAGTTTGATTGGACGAGATATGATGGCACAA
SYMN007 TGGTCCCCCTTTGAAGGGGGTTCCTATGAGGTTATCTCGCGTCTTGAGAAGCCTGGGAACCATTTATATTGAGTTTGATTGGACCCGATATGATGGCACTA
SYMA006 TGGTCTCCCCTTTGAAGGTGGCTTTTCATGAAGTTATCTAGATTAGATCGTCCGGGTAAATAAGTATATTGAGTTTGATTGGACTCGATATGATGGTACCA
SYMN011
SYMN010 TGGTCTCCCCTTTGAAGGTGGCTTCCATGAGGTTGTTTCCCCTCTTGATCATTCAGGTTCATACTTATATTGAGTTGCGATTGGACTCGATATGATGGCACGA
SYMA009 TGGTCTCCTTTTGAAGGTGGCTTTTCATCAAGCCATCTCCCATTAGAACGTAAAGGTAATATCTATATAGAGTTTGATTGGACACGCTATGACGGAACTA
SYMA010 TGGTCCCCCTTTGAAGGGGGCTTCCTATGAGGTCACTCTCTAGATTAGATCGTCCGGTAAACAAATTATTGAGTTTGATTGGACTCGATATGATGGCACCA
MEMT006 TGGTCACCCCTTTGAAGGTGGCTTTGATGAGGTTCTTCGCCGTATTGAAAAGCCTGAAAAATCAATATATTGAACTGGATTGGACTCGGTATGATGGCACTA
SYRL007 -----

```

```

      3510      3520      3530      3540      3550      3560      3570      3580      3590      3600
....|....|....|....|....|....|....|....|....|....|....|....|....|....|....|
MZ218053 UUCCGCUUGAAGUGUUUCGACACAUCAAUGGGUUUAGGUUUCACAUUGCUGGAUCCUGCCUACCACACAAGUGUUAAUAAGGGGAUAUACUCUGGUUACGU
SYMN012 TTCCCTGTGGAGGTTTTTAGGCACATTAAGAAATTTTAGGTTTAGCATGTTGGATCCAGTTTATAAGACCAAATTGAACAGAGACATTTATGATTGGTACAT
SYMA008 TACCCTGTTGAGGTATTTAGGCATATTAACAACTTTTCGGTTTAGTATGTTAGATCCAGTTTATAAGACCACAGTTAATTCCTCGATCTACCAGTGGTACAT
MEMN002
SYMA003 TCCCAACTGAGGTTTTTATACATGTTAAATCATTTAGGTTTCTGATGCTTGACCCAGTATATAAGACACCTCTTAATAGGGGCATTTATGATTGGTACGT
SYMN007 TCCCTGTTGAGGTTTTTCTACATATTAAGAGTTTTCGGTTTTCCATGCTCGATCCGGCTTATAAGAATGATACCCCTTAGGTTCCATTTATGATTGGTACGT
SYMA006 TTCCCTGTTGAGGTTTTTAGGCATATAAGAGTTTTAGATTTTCTATGCTGGATCCTGTTTATAAGACCACCTTGTAATAAATCCATATATGACTGGTACGT
SYMN011
SYMN010 TTCCAGTTGAGGTTTTTCAGGCATATTAAGAACTTTAGATTTGCCATGCTTGACCCAGTCTATAAAACCACAGTCAATAAGGATGTTTATGATTGGTACGT
SYMA009 TTCCCTGAGGAGGTTTTTAGGCATATTAAGTCTTTTATGATTTAGTATGCTTGACCCCGTTTATAAGAC
SYMA010 TACCCTGTTGAGGTTTTTCAGGCATATTAAGAAATTTTAGGTTTAGTATGYTAGATCCAGTTTATAAAACAGATATGAACAGATCTATTTATGATTGGTACGT
MEMT006 TACCGCTTGAGGTGTTTCGACACATCAAGTGGTTTAGGTATCAGATGCTTGATTCTTCCTACCATACACCTGAAAAATCGTGGTGTTTATGAATGGTATGT
SYRL007 -----TATGT

```

```

      3610      3620      3630      3640      3650      3660      3670      3680      3690      3700
....|....|....|....|....|....|....|....|....|....|....|....|....|....|....|
MZ218053 UGAUCAGAUUGGCCGAGGCAUGUCCUCUUGCCUAGUGGUGAGGUCACUAUCCAGGAGCGUGGAAACCCUUCUGGUCAGAUUCUCUACCACUUGGAUAAC
SYMN012 TGGTCAACTTATGTACCGTTATGTTTGTACCATCTGGAGAAATCACAAATTCAGGATAGAGGCATCCCTTCAGGTCAAATATCCACTACTATGGATAAT
SYMA008 TGGTCAACTTATGTACCGACATGTTCTCCTTCCTTCTGGTGAAGTTACCATACAAGATCGTGGCAATCCAGCGGACAGATCTCCACAACATATGGACAAAT
MEMN002
SYMA003 TGGACAACCTTATGTACCGTTATGTTCTTTTACCATCTGGAGAGATTACCATTCAGATCGTGGTAAATCCTTCTGGCCAAATTTCAACCACAATGGACAAAT
SYMN007 TGGTCAGCTTATGTACCGTTATGTTGTTGCTTCTGGAGAAATAACCATTCAGATAGGGGTAAACCTTCAGGGCAAAATTTCTACTACCACTGATAAT
SYMA006 TGATCAACTTATGTACCGTCATGTCCTTTTGCCTTCTGGAGAGATTACTATACAGAGTAGGGGTAAATCCTAGTGGCCAAATTTCTACAACCATGGATAAT
SYMN011
SYMN010 TGGTCAGCTATTGTACCGATATGTCCTTTTACCTCTGGTGAGATTACCATTCAGATCGTGGTAAATCCATCCGGGCAGATTTCCACTACCATGGATAAT
SYMA009
SYMA010 TGGTCAGCTTGTGTACCGTTATGTTCTTTTACCATCTGGTGAGGTCACTGTTCAGGATAAAGGTAATCCCTCTGGCCAAATTTCTACCACATATGGATAAT
MEMT006 AGATCAGATGTGAGGCGACATGTTTGTGCTTAGTGGTGAAGTTACCGTGCAGGAGCGTGGTAAACCATCTGGTCAGATTTCTACAACATATGGATAAT
SYRL007 TTCTCAATTGTGTATAGGTATGTTCTTTTGCCTTCAAGTGAAGTTACCATACAACTAAGGGAAATCCCTCTGGACAGATTTCAACAACATATGGATAAC

```

```

      3710      3720      3730      3740      3750      3760      3770      3780      3790      3800
....|....|....|....|....|....|....|....|....|....|....|....|....|....|....|
MZ218053 AAUATGAUUAACACUUUUUUGCAAGCUUUUGAGUUUGCUUAUGUACAUCAGAGAUUAUACUGAUUCCAUGCUUGAGGCUGAAUGGAAGAAAUUGACACCA
SYMN012  AATTTGGTTAATACATTTTTCAGGCTTTTGAGTTTGCGTATTTGAACCCCGAGTTATCTTTGGATGAACTCGATTGTTTATATGCGCAGTGTAACAT
SYMA008  AATATGGTTAATTGTTTCTCCAGGCTTTTGAGTTTGCGTATTTGAATCCTGGCTATCTATGGCTGAGTTAGACCTTTTATATGCGCAGTGTAATCTT
MEMN002
SYMA003  AATATGGTAAATACCTTCCCTCCAGGCTTTTGAGTTTGCGTATTTGAATCCTGGGCTCTCTTTTGGAGAGCTCGATGATTTATATGCGCGTCTGACTCTT
SYMN007  AATATGGTCAACACCTTTTTCAGGCTTTTCAGTTTGCTTATCTTAATCCAGAGTTGTCTCTGGATGAATTAGAGGTGTTGTATAGTCAGGGTGATTCTC
SYMA006  AACATGGTTAATTGTTTCTCCAGGCTTTTGAGTTTGCGTATTTGAATCCTGGCTTGTCCTCAACACGAGCTTGATGGTTTATATGCGCAGGCAGACTCTT
SYMN011
SYMN010  AATTTAGTCAACACCTTTTTTTCAGGCTTTTGAGTTTGCGTATGTGAATCCTGAGCTCTCTATGGATGAGCTTGATATTTTGTATGCGCAATGTGACTCAC
SYMA009
SYMA010  AATCTGGTTAACACCTTTTTTTCAGGCTTTTGAGTTTGCGTATGTGAACCCCTGAGCTCTCTTTGGATGAGCTTGATGTTTGTATGCGCAGTGTAACAT
MEMT006  AACATGGTTAACACCTTTTTTCAAGCATTGAAATTTGCCATGTTCCATCCAGACTATGATGATTCCAGGCTTGAGAGTGAGTGGAAGAAATGTGACACTA
SYRL007  AATATGGTCAATTAATTTTTTTCAGGCTTTTGAGTTTGCTTATCTTCATCCTAGTTTTTGGCGAAGATGCCCTTGCTTCTGCTTGGTCTAATACTGATACTT

```

```

      3810      3820      3830      3840      3850      3860      3870      3880      3890      3900
....|....|....|....|....|....|....|....|....|....|....|....|....|....|....|
MZ218053 UCGUGUAUGGUGAUGAUAGGAUAUCAUCUUGGCCAUUCUGUCCUCCGAAUUAUGUUGAUAUGUUGUUGAGAUUAUAAGGUUGUUUUUGUAUGUGGGU
SYMN012  TAATTTATGGTGATGATAGATTATCATCGTGGCCCTGCATACCTGATAACTATCCTGAAAGTGTTCCTGCCATGTATGAACATGTTTTTGAATGTGGGT
SYMA008  TAGTCTATGGAGATGATCGGTTGACATCATGGCCGAGTGTCCCGATGATTATCCCAATGTGGTTTCCCGCATGTATGAACATGTCTTTGGCATGTGGGT
MEMN002
SYMA003  TAATCTATGGAGATGATAGATTATCATCATGGCCGTGTCGTCGCCGATAATTATCAAGAAGGTGTTTCTGCCATGTATGAGCATGTTTTTGGTATGTGGGT
SYMN007  TTATTTATGGAGATGATAGACTCACATCTTGGCCCTGTGTCCCTGAGGATTATCCTAACCTTGTCTCCAGAATGTATGAACATGTATTTGGCATGTGGGT
SYMA006  TAGTTTATGGAGATGATAGATTAACTCTTGGCCGTTTGTCCCGATGATTATCCTAATTTGGTATCTCGCATGTATGAACATGTCTTTGGCATGTGGGT
SYMN011
SYMN010  TTATATATGGAGATGATCGTTTGTATCTTGGCCGTGTTGTTCCTGATAATTATCAGGAGCTTGATATCATCTATGTATAAACATATCTTTGGTATGTGGGT
SYMA009
SYMA010  TAATTTATGGTGATGATAGATTATCATCATGGCCATTGTTTCCTGATGATTATCCTGATCGTGTTCGCCCATGTACGAACATGTCTTTGGCATGTGGGT
MEMT006  TTGTTTATGGCGATGATAGGATTTTCTTGGCCYAGTGTCCACCTAACATATGTTAATGAAGTTGTTGAGATGTATAAAATTGTTTTGGTATGTGGGT
SYRL007  TGATCTACGGTGATGACCGTATCTCATCTT -----

```

```

      3910      3920      3930      3940      3950      3960      3970      3980      3990      4000
....|....|....|....|....|....|....|....|....|....|....|....|....|....|....|
MZ218053 UAAGCCUGAAAAGAUAGUAGUUAGAAAUGAGUUAAGUGGUUUUUUUUGGUUUUACAGCUAUCCUUUCUGAUGGUUAUGUAUCUGCCUUGUCCUAAU
SYMN012  AAAACCAGATAAAGTTAAAGTCTCTGATACACTTGAAGGCCTCACTTTTGTGGATTTACAGTTATTAGAAAGTGGGGGTTACTATTTGCCATACCTGCA
SYMA008  TAAGGAGAACAAAGTTAAAGTTTCTGATACATTAGAAGGGCTGACCTTTTGTGGATTTACTGTTATTTCGATCTGGTGGGATGTATTTACCTGTTCCATCT
MEMN002
SYMA003  CAAACCAGAAAAGTTAAAGTCTCTGATACACTTGAAGGCCTGACTTTTTGTGGTTTTACTGTTATTAGTAGTGGCGGGCTTTTATTTTCTGTACCAGCT
SYMN007  TAAACCTGACAAAGTTAAGGTCTCAGATACGCTAGAAGGACTTACTTTCTGTGGTTTTACTGCTATTAAGAGTGATGGGCCTTATCTTCTGTGCCGTT
SYMA006  TAAGCCAGAAAAATTAAAGTATCAGACACCTTGAAGGGCTTGACCTTTTGTGGTTTTACTGTTATTTCGATCTGGAGGTATGTATCTCCCTATTCCATCT
SYMN011
SYMN010  TAAGCCCGACAAAGTTAAATATCTGATACCTTTGAGGGTTTGACTTTTTGTGGTTTACCATCATTCGTAGCGGGGGTTATTATCTTCTGTTCATCT
SYMA009
SYMA010  TAAGGAGAACAAAGTTAAAGTTTCTGATACATTAGAAGGGCTTACTTTTTGTGGATTTACTGTTATTTCGGAGTGGCGGATTTTATCTCCCTATTCCATCA
MEMT006  AAAACCTGAAAAGATTGTAGTCAGAAATGAGCTTAGTGGTGTTCCTTTTTGTGGGTTTACAGCTATCCTTTCTGATGGAATGTATTTGCCAGTGCTAAAT
SYRL007  -----

```
