# Supplementary material for: A Novel Coronavirus and a Broad Range of Viruses in Kenyan Cave Bats
Source: MDPI journal article supplement (doi:10.3390/v14122820), 2022-12-17
Supplement: s1 [file s1]

**Supplementary Figure S5:** Alignment of the *Rhinolophus ferrumequinum* retrovirus isolate RFRV (JQ303225) with RFRV-Kenya-SYMN003 (ON893141) characterized in the study. Retroviral gag-pol-env regions and primer binding site on the viral genome are highlighted.

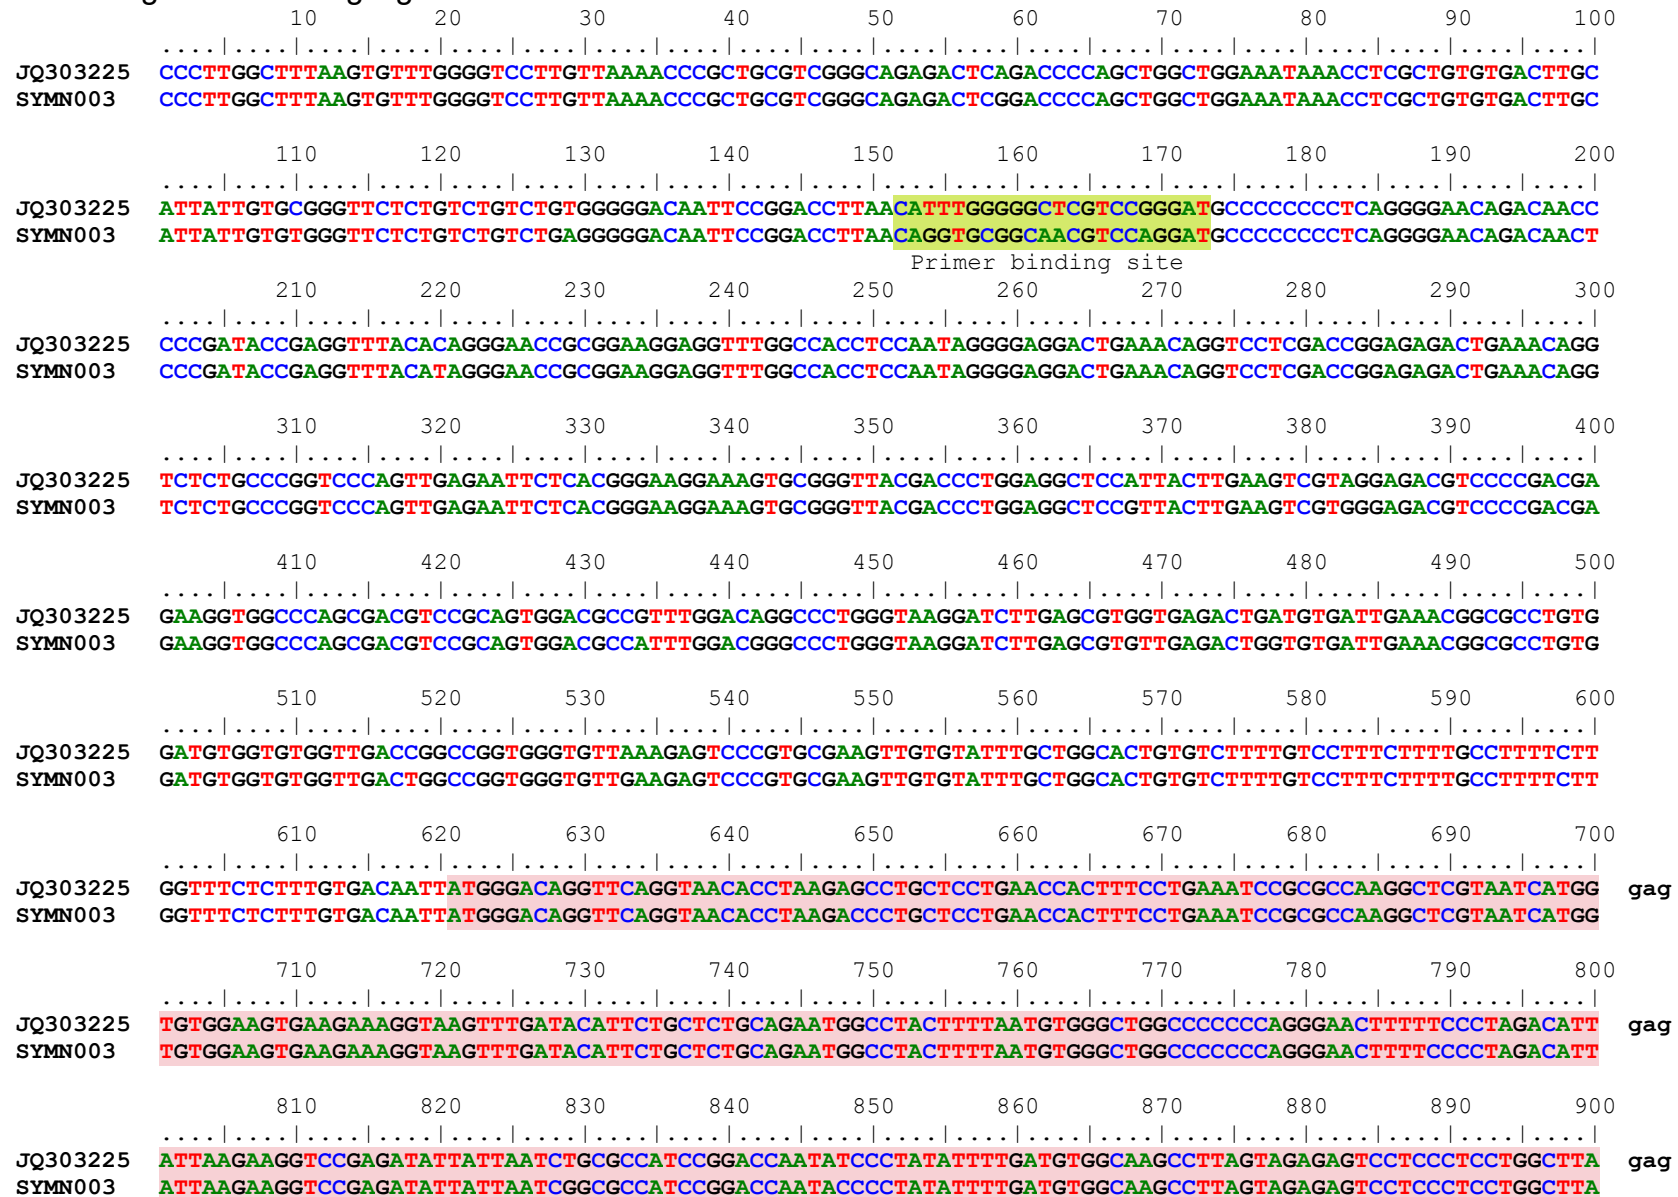

[illegible]

|          |                                                                                                        |      |      |      |      |      |      |      |      |      |  |     |
|----------|--------------------------------------------------------------------------------------------------------|------|------|------|------|------|------|------|------|------|--|-----|
|          | 1810                                                                                                   | 1820 | 1830 | 1840 | 1850 | 1860 | 1870 | 1880 | 1890 | 1900 |  |     |
| JQ303225 | .... .... .... .... .... .... .... .... .... .... ....                                                 |      |      |      |      |      |      |      |      |      |  |     |
| SYM003   | AAAGCCCCGGCCGTGTTTTTAGAACGCCCTCATGATGCTTATAGACAGTACACCCCGTTGGACCCCTCGCAGAGGAAAACCAAGTCGGCTGTAATTATGTC  |      |      |      |      |      |      |      |      |      |  | gag |
| JQ303225 | 1910                                                                                                   | 1920 | 1930 | 1940 | 1950 | 1960 | 1970 | 1980 | 1990 | 2000 |  |     |
| JQ303225 | .... .... .... .... .... .... .... .... .... .... ....                                                 |      |      |      |      |      |      |      |      |      |  |     |
| SYM003   | CTTTATAAACCAAGGCTGCCCGAGATATTAGGAAGAAATTGTACAAACAGGAGGGACTGGGAGAAATGCTATTCTGGGATTTAATGAAAGTAGCGGAGAGA  |      |      |      |      |      |      |      |      |      |  | gag |
| JQ303225 | 2010                                                                                                   | 2020 | 2030 | 2040 | 2050 | 2060 | 2070 | 2080 | 2090 | 2100 |  |     |
| JQ303225 | .... .... .... .... .... .... .... .... .... .... ....                                                 |      |      |      |      |      |      |      |      |      |  |     |
| SYM003   | GTCTTCAACACTCGAGAGACTCCCGAAGAAAGGGAGGATAGAAATTAGAAAAGAAAATCAGGAATTACAGGAACGAATCAGGAAGGAAGACAGAGAGCATC  |      |      |      |      |      |      |      |      |      |  | gag |
| JQ303225 | 2110                                                                                                   | 2120 | 2130 | 2140 | 2150 | 2160 | 2170 | 2180 | 2190 | 2200 |  |     |
| JQ303225 | .... .... .... .... .... .... .... .... .... .... ....                                                 |      |      |      |      |      |      |      |      |      |  |     |
| SYM003   | AGAGCAGGGAGAACAGGAGGCAGCAGAGGGAGATGGCCAAAGATCTTGTGGCAGGCGTGCAAAGCACAGTCAGGGTGGGACCGAGTCCGGCCGGACCAGC   |      |      |      |      |      |      |      |      |      |  | gag |
| JQ303225 | 2210                                                                                                   | 2220 | 2230 | 2240 | 2250 | 2260 | 2270 | 2280 | 2290 | 2300 |  |     |
| JQ303225 | .... .... .... .... .... .... .... .... .... .... ....                                                 |      |      |      |      |      |      |      |      |      |  |     |
| SYM003   | CCGACCGTGGAGACCGCGGCCCCGACTGGATAGGGGACAGTGTGCAAACTGCAAAAGAGTATGGACATTGGAAGAGGGAGTGCCCCAAGCGCCAGGGCCAA  |      |      |      |      |      |      |      |      |      |  | gag |
| JQ303225 | 2310                                                                                                   | 2320 | 2330 | 2340 | 2350 | 2360 | 2370 | 2380 | 2390 | 2400 |  |     |
| JQ303225 | .... .... .... .... .... .... .... .... .... .... ....                                                 |      |      |      |      |      |      |      |      |      |  |     |
| SYM003   | ACAGGGCAAGACGCACGGGTCTTGCTGGCGGGGATGGAGAGTGACTAGGGGAGACGGGACTCGGATCCCCTCCCCGAGTCTTGGGTAACTGCGTATGTGG   |      |      |      |      |      |      |      |      |      |  | pol |
| JQ303225 | 2410                                                                                                   | 2420 | 2430 | 2440 | 2450 | 2460 | 2470 | 2480 | 2490 | 2500 |  |     |
| JQ303225 | .... .... .... .... .... .... .... .... .... .... ....                                                 |      |      |      |      |      |      |      |      |      |  |     |
| SYM003   | AGGGGAAGCCAGTAGGATTCAATGGTAGACACAGGAGCCCAGTACTCAGTTTTGAATAAGCCTACAGAGCCCTTATCTCAGAAAACCAAGTTTGGTGCAAGG |      |      |      |      |      |      |      |      |      |  | pol |
| JQ303225 | 2510                                                                                                   | 2520 | 2530 | 2540 | 2550 | 2560 | 2570 | 2580 | 2590 | 2600 |  |     |
| JQ303225 | .... .... .... .... .... .... .... .... .... .... ....                                                 |      |      |      |      |      |      |      |      |      |  |     |
| SYM003   | GGCAACTGGGTCCAAGGCTTATCGGTGGACTAGTAGGCGCAAGTGGACTTAGGCCGCCCAAGTGACCCACTCCTTCCAGTTATCCCTGAATGCCCT       |      |      |      |      |      |      |      |      |      |  | pol |
| JQ303225 | 2610                                                                                                   | 2620 | 2630 | 2640 | 2650 | 2660 | 2670 | 2680 | 2690 | 2700 |  |     |
| JQ303225 | .... .... .... .... .... .... .... .... .... .... ....                                                 |      |      |      |      |      |      |      |      |      |  |     |
| SYM003   | GCCCCCTTATTGGGGCGCATCTCCTGACTAAGATCAGGGCTCAGATCCATTTTGAGCCGGATGGCATTAAAGCTATTGGATGGCCAAGGACAGCCCCCTCC  |      |      |      |      |      |      |      |      |      |  | pol |

|          |                                                                                                          |      |      |      |      |      |      |      |      |      |     |
|----------|----------------------------------------------------------------------------------------------------------|------|------|------|------|------|------|------|------|------|-----|
|          | 2710                                                                                                     | 2720 | 2730 | 2740 | 2750 | 2760 | 2770 | 2780 | 2790 | 2800 |     |
| JQ303225 | ACATTTTGAACCTGTCTCTTGTGGATGAACATCGCCTGTTGCGCCCTGCAGGACAAACCCCTACAACCCCTCCCTCTACAGAATGGCCCCGTGATATGGATTAT |      |      |      |      |      |      |      |      |      |     |
| SYM003   | ACATTTTGAACCTGTCTCTTGTGGATGAACATCGCCTGTACGCCCTGCAGGACAAACCCCTACAACCCCTCCCTCTACAGAATGGCCCTGTGACATGGATTAT  |      |      |      |      |      |      |      |      |      |     |
|          | 2810                                                                                                     | 2820 | 2830 | 2840 | 2850 | 2860 | 2870 | 2880 | 2890 | 2900 |     |
| JQ303225 | TTGGCTTAAACGTACCCCTCAGGCGTGGGCGGAAATAGCGGGTGTGGGCCGGGCGGCCCGCCGAGCACCAGTAGTGGTGGAACTTAAAGCCTCGGCCAG      |      |      |      |      |      |      |      |      |      | pol |
| SYM003   | TTGGCTTAAACGTACCCCTCAGGCGTGGGCGGAAATAGCGGGTGTGGGCCGGGCGGCCCGCAGAGCACCAGTAGTGGTCGAACTTAAAGCCTCGGCCAG      |      |      |      |      |      |      |      |      |      |     |
|          | 2910                                                                                                     | 2920 | 2930 | 2940 | 2950 | 2960 | 2970 | 2980 | 2990 | 3000 |     |
| JQ303225 | CCTATCCGGATCCGCCAGTACCCCATGTCTGCAGAGGCGCGGAAAGGGATCGCCCCGCACATTAACCGTTTACTGGAAGCTGGAATACTGAAACCTTGCC     |      |      |      |      |      |      |      |      |      | pol |
| SYM003   | CCTATCCGGGTCCGCCAGTACCCCATGTCTGCAGAAGCGCGGAAAGGGATTGCCCCGCACATTAACCGTTTACTGGAAGCTGGAATACTGAAACCTTGCC     |      |      |      |      |      |      |      |      |      |     |
|          | 3010                                                                                                     | 3020 | 3030 | 3040 | 3050 | 3060 | 3070 | 3080 | 3090 | 3100 |     |
| JQ303225 | ATTCTGCCGTGGAACACCCCACTTCTCCCCGTTAAGAAACCGGGGGGAAAAGATTATAGGCCAGTCCAGGACTTGAGGGAAGTGAATAAGAGGGTTGAAGA    |      |      |      |      |      |      |      |      |      | pol |
| SYM003   | ATTCTGCCGTGGAACACCCCACTTCTCCCCGTTAAGAAACCGGGGGGAAAAGATTATAGGCCAGTCCAGGACTTGAGGGAAGTGAATAAGAGGGTTGAAGA    |      |      |      |      |      |      |      |      |      |     |
|          | 3110                                                                                                     | 3120 | 3130 | 3140 | 3150 | 3160 | 3170 | 3180 | 3190 | 3200 |     |
| JQ303225 | CATCCACCCCAACGGTCCCCAACCCCTTATACCTTACTAAGTCACCTTGCCCCCTTCACATGTCTGGTATACTACCTTAGACCTAAAGGATGCGTTTTTTAGC  |      |      |      |      |      |      |      |      |      | pol |
| SYM003   | CATCCACCCCAACGGTCCCCAACCCCTTATACCTTACTAAGTCACCTTGCCCCCTTCACATGTCTGGTATACTACCTTAGACCTAAAGGATGCTTTTTTTAGC  |      |      |      |      |      |      |      |      |      |     |
|          | 3210                                                                                                     | 3220 | 3230 | 3240 | 3250 | 3260 | 3270 | 3280 | 3290 | 3300 |     |
| JQ303225 | ATAGCCCTGGCACCCAGCAGCCAACACATTTTTCCTTCGAATGGAATAATGGCAATACGGGAACCCCCGGGCAGCTGACCTGGACTAGACTACCGCAAG      |      |      |      |      |      |      |      |      |      | pol |
| SYM003   | ATAGCCCTGGCACCCAGCAGCCAACACATATTTGCTTCGAATGGAATGATGGCAATACAGGAACCCCCGGGCAGCTGACCTGGACTAGACTACCGCAAG      |      |      |      |      |      |      |      |      |      |     |
|          | 3310                                                                                                     | 3320 | 3330 | 3340 | 3350 | 3360 | 3370 | 3380 | 3390 | 3400 |     |
| JQ303225 | GCTTCAAAACTCTCCAACCTCTGTTTAAATGAAGCCCTAAATCAGGATTTGGAATCGTTTCGCCAGAGCCATAATTCAGTTACGCTCCTGCAGTACGTAGA    |      |      |      |      |      |      |      |      |      | pol |
| SYM003   | GCTTCAAAACTCTCCAACCTCTGTTTAAATGAAGCCCTAAATCAGGATTTGGAATCGTTTCGCCAGAGCCATAATTCAGTTACGCTCCTGCAATACGTAGA    |      |      |      |      |      |      |      |      |      |     |
|          | 3410                                                                                                     | 3420 | 3430 | 3440 | 3450 | 3460 | 3470 | 3480 | 3490 | 3500 |     |
| JQ303225 | TGACTTGCTTCTGGCGGCCCTCCGAAGCAGAATGCCGACAGGCCACTGGAGACCTCCTCCAGGAGCTGGGGCAGTTGGGCTATCGGGCCAGTGCAAG        |      |      |      |      |      |      |      |      |      | pol |
| SYM003   | TGACTTGCTTCTGGCGGCCCTCCGAAGCCGAATGCCGACAGGCCACTGGAGACCTCCTCCAGGAGCTGGGGCAGTTGGGCTATCGGGCAAGTGCAAG        |      |      |      |      |      |      |      |      |      |     |
|          | 3510                                                                                                     | 3520 | 3530 | 3540 | 3550 | 3560 | 3570 | 3580 | 3590 | 3600 |     |
| JQ303225 | AAGGCTCAAAATATGCAGGCAAAACAGTCACCTACCTGGGGTATAAACTGAAAGAGGGAACCAAGATGGCTGACAGAGGCCATGAAAGAGACTATTCTTAGAC  |      |      |      |      |      |      |      |      |      | pol |
| SYM003   | AAGGCTCAAAATATGCAGGCAAAACATTCACCTACCTGGGGTATAAGCTGAAAGAGGGAACCAAGATGGCTGACTGAGGCCATGAAAGAGACTATTCTTAGAC  |      |      |      |      |      |      |      |      |      |     |

|          |                                                                                                       |                                                                                |                                            |      |      |      |      |      |      |      |     |     |
|----------|-------------------------------------------------------------------------------------------------------|--------------------------------------------------------------------------------|--------------------------------------------|------|------|------|------|------|------|------|-----|-----|
|          | 3610                                                                                                  | 3620                                                                           | 3630                                       | 3640 | 3650 | 3660 | 3670 | 3680 | 3690 | 3700 |     |     |
| JQ303225 | .... .... .... .... .... .... .... .... .... .... .... ....                                           |                                                                                |                                            |      |      |      |      |      |      |      |     |     |
| SYMN003  | TTCCAGTCCCGACCTCAGCACGAGAGGTC                                                                         | CGTGAGTTTTTAGGGACGACAGGCTACTG                                                  | CCGGCTGTGGATTTTGGGGTATGCTGAAATAGCAAAACCTCT |      |      |      |      |      |      |      | pol |     |
|          | 3710                                                                                                  | 3720                                                                           | 3730                                       | 3740 | 3750 | 3760 | 3770 | 3780 | 3790 | 3800 |     |     |
| JQ303225 | .... .... .... .... .... .... .... .... .... .... .... ....                                           |                                                                                |                                            |      |      |      |      |      |      |      |     |     |
| SYMN003  | GATGAGGCAACCAAGGATAAGGTCCCTTGGGCCTGGGGTCAGACCAACAGAAGGCC                                              | TACGATGA                                                                       | ACTCAAGGTCGCTCCTAAGAGCCCCGGCTCTG           |      |      |      |      |      |      |      | pol |     |
|          | 3810                                                                                                  | 3820                                                                           | 3830                                       | 3840 | 3850 | 3860 | 3870 | 3880 | 3890 | 3900 |     |     |
| JQ303225 | .... .... .... .... .... .... .... .... .... .... .... ....                                           |                                                                                |                                            |      |      |      |      |      |      |      |     |     |
| SYMN003  | GCATTGCCAGACCCCTGAAGCCCTTCACTCTCTTTGTTGATGAGAGGAGGGGAATAGCGAAAGGAGTGCTAATGCAGCGTCTGGGGCCCTGGAACGTC    |                                                                                |                                            |      |      |      |      |      |      |      |     | pol |
|          | 3910                                                                                                  | 3920                                                                           | 3930                                       | 3940 | 3950 | 3960 | 3970 | 3980 | 3990 | 4000 |     |     |
| JQ303225 | .... .... .... .... .... .... .... .... .... .... .... ....                                           |                                                                                |                                            |      |      |      |      |      |      |      |     |     |
| SYMN003  | CGGTTGCCATTTATCCAAGAAGCTAGATCCAGTTGCAGCAGGATGGCCCCGTGCTTAAGGATCATTTGCGGCAGTAGCCCTAATGGTGAAGGATGCTGA   |                                                                                |                                            |      |      |      |      |      |      |      |     | pol |
|          | 4010                                                                                                  | 4020                                                                           | 4030                                       | 4040 | 4050 | 4060 | 4070 | 4080 | 4090 | 4100 |     |     |
| JQ303225 | .... .... .... .... .... .... .... .... .... .... .... ....                                           |                                                                                |                                            |      |      |      |      |      |      |      |     |     |
| SYMN003  | TAAACTCACTTTTGGGCAACATCTGAAGGTAGTGACCCCCCATGCGATCGAGGGGGTCCTGAAATATCCCCCTGGTAGGTGGATGACTAATGCCCGACTA  |                                                                                |                                            |      |      |      |      |      |      |      |     | pol |
|          | 4110                                                                                                  | 4120                                                                           | 4130                                       | 4140 | 4150 | 4160 | 4170 | 4180 | 4190 | 4200 |     |     |
| JQ303225 | .... .... .... .... .... .... .... .... .... .... .... ....                                           |                                                                                |                                            |      |      |      |      |      |      |      |     |     |
| SYMN003  | ACGCATTACCAAGGACTCTTGCTAGATGCACCCCGGATCATCTTCGCTGAACCCACCGCTCTGAATCCAGCCACCTGCTGCCGACCCCGGATCTGAGAG   |                                                                                |                                            |      |      |      |      |      |      |      |     | pol |
|          | 4210                                                                                                  | 4220                                                                           | 4230                                       | 4240 | 4250 | 4260 | 4270 | 4280 | 4290 | 4300 |     |     |
| JQ303225 | .... .... .... .... .... .... .... .... .... .... .... ....                                           |                                                                                |                                            |      |      |      |      |      |      |      |     |     |
| SYMN003  | CTCCCCTGCGATGATTGCCAAGAGATCATGGCAGAAGTCACCCAGGTGCGCCCCGACCTCCAGGACACCGCACTACCCAACAGTGAGTTGGTATGGTACAC |                                                                                |                                            |      |      |      |      |      |      |      |     | pol |
|          | 4310                                                                                                  | 4320                                                                           | 4330                                       | 4340 | 4350 | 4360 | 4370 | 4380 | 4390 | 4400 |     |     |
| JQ303225 | .... .... .... .... .... .... .... .... .... .... .... ....                                           |                                                                                |                                            |      |      |      |      |      |      |      |     |     |
| SYMN003  | TGATGGAAGCAGCTTCGTTATAGATGGTGTGCGGAGGGCAGGCGCAGCGGTGGTAGACCAAGGGGGAACATCATTTGGAGTGCTTCGCTTTCCCCGGGG   |                                                                                |                                            |      |      |      |      |      |      |      |     | pol |
|          | 4410                                                                                                  | 4420                                                                           | 4430                                       | 4440 | 4450 | 4460 | 4470 | 4480 | 4490 | 4500 |     |     |
| JQ303225 | .... .... .... .... .... .... .... .... .... .... .... ....                                           |                                                                                |                                            |      |      |      |      |      |      |      |     |     |
| SYMN003  | ACATCAGCACAGAAGGCCGAAC                                                                                | TGATCGCGCTGGCGGAGGCGCTGGAACGGGCCGAAGGGAGACGAGTGACTGTCTACACCGATAGCCGCTACGCCTTTG |                                            |      |      |      |      |      |      | pol  |     |     |

|          |                                                                                                         |      |      |      |      |      |      |      |      |      |     |
|----------|---------------------------------------------------------------------------------------------------------|------|------|------|------|------|------|------|------|------|-----|
|          | 4510                                                                                                    | 4520 | 4530 | 4540 | 4550 | 4560 | 4570 | 4580 | 4590 | 4600 |     |
| JQ303225 | ..... ..... ..... ..... ..... ..... ..... ..... ..... ..... .....                                       |      |      |      |      |      |      |      |      |      |     |
| SYM003   | GCACTGTCCATGTGCATGGCGCCATCTACCGGGAAAGAGGCTTTGTTACAGCGGAAGGAAAGGCTCTGCGCAATCTTCCTGAGGTACGAAGACTACTGAT    |      |      |      |      |      |      |      |      |      | pol |
|          | GCACTGTCCATGTGCATGGCGCTATCTACCGGGAAAGAGTCTTTGTTACAGCGGAAGGAAAGACTCTGCGCAATCTTCCTGAGGTACGAAGACTGCTAAT    |      |      |      |      |      |      |      |      |      |     |
|          | 4610                                                                                                    | 4620 | 4630 | 4640 | 4650 | 4660 | 4670 | 4680 | 4690 | 4700 |     |
| JQ303225 | ..... ..... ..... ..... ..... ..... ..... ..... ..... ..... .....                                       |      |      |      |      |      |      |      |      |      |     |
| SYM003   | GGCCGTGCAAAATGCCCGGGCAGTCGCAGTTGTCCACATCCCTGGGCACCAGTCTGCCAGACCCCGGAAGCTGAAGGAAACCGGCAGCGGATGAAGCC      |      |      |      |      |      |      |      |      |      | pol |
|          | GGCTGTGCAAAATGCCCGGGCGGTTCGCAGTTGTCCACATCCCTGGGCACCAGTCTGCACAGAGCCCAAGCTGAAGGAAACCGGCAGCGGATGAAGCC      |      |      |      |      |      |      |      |      |      |     |
|          | 4710                                                                                                    | 4720 | 4730 | 4740 | 4750 | 4760 | 4770 | 4780 | 4790 | 4800 |     |
| JQ303225 | ..... ..... ..... ..... ..... ..... ..... ..... ..... ..... .....                                       |      |      |      |      |      |      |      |      |      |     |
| SYM003   | GCCAAGACAGCGGCAGTAGCTTCATCAGCTTTAGCACTCACCCCTGCCACACCCGAGCTCCCTCGCCTGCCCGCGACCTGACTACACTCCGAAGACC       |      |      |      |      |      |      |      |      |      | pol |
|          | GCCAAGGCAGTGGCAGTAGCTTCATCAGCTTTAGCACTCACCCCTGCCACACCCGAGCTCCCTCGCCTGCCCGCGACCTGACTACACTCCGGAAGACC      |      |      |      |      |      |      |      |      |      |     |
|          | 4810                                                                                                    | 4820 | 4830 | 4840 | 4850 | 4860 | 4870 | 4880 | 4890 | 4900 |     |
| JQ303225 | ..... ..... ..... ..... ..... ..... ..... ..... ..... ..... .....                                       |      |      |      |      |      |      |      |      |      |     |
| SYM003   | TGCGATGGATCCAGAACCACCACTGCCCGGAATCTGATCAGCAGGGGTGGCATCGGGATACAGAAGGAAGATTGATACGCGGGCACAGCTAGACTGTTT     |      |      |      |      |      |      |      |      |      | pol |
|          | TGCGATGGATCCAGAACCACCACTGCCCGGAATCTGATCAGCAGGGGTGGCGTCGGGATACAGAAGGAAGATTGATACGCGGGCACAGCTAGACTGTTT     |      |      |      |      |      |      |      |      |      |     |
|          | 4910                                                                                                    | 4920 | 4930 | 4940 | 4950 | 4960 | 4970 | 4980 | 4990 | 5000 |     |
| JQ303225 | ..... ..... ..... ..... ..... ..... ..... ..... ..... ..... .....                                       |      |      |      |      |      |      |      |      |      |     |
| SYM003   | CTTCTCTCCAACCTGCATCAAGCCACCCACTTAGGAAAAAAGAAGTTGCTGACAATTCTCGAGTCCGCCCGCCTCCGGTTTCCCCGACAAGCGGCTCAGA    |      |      |      |      |      |      |      |      |      |     |
|          | CTTCTCTCCAACCTGCATCAAGCCACCCACTTAGGAAAAAAGAAGTTGCTGACAATTCTCGAGTCCGCCCGCCTCCGGTTTCCCCGACAAGCAGCTCAGA    |      |      |      |      |      |      |      |      |      |     |
|          | 5010                                                                                                    | 5020 | 5030 | 5040 | 5050 | 5060 | 5070 | 5080 | 5090 | 5100 |     |
| JQ303225 | ..... ..... ..... ..... ..... ..... ..... ..... ..... ..... .....                                       |      |      |      |      |      |      |      |      |      |     |
| SYM003   | TTCAAGAGATTGTAGATCAGTGCATTGGGTGCCAGGCTATGAGACCCAGTAGGAAAGGACCCCAACATACAGGTACGAGGGTACGGGGAAGAGCGCCGGG    |      |      |      |      |      |      |      |      |      |     |
|          | TTCAAGAGATTGTAGATCAGTGCATTGGGTGCCAGGCTATGAGACCCAGTAGGAAAGGACCCCAACATACAGGTACGAGGGTACGGGGAAGAGCGCCGGG    |      |      |      |      |      |      |      |      |      |     |
|          | 5110                                                                                                    | 5120 | 5130 | 5140 | 5150 | 5160 | 5170 | 5180 | 5190 | 5200 |     |
| JQ303225 | ..... ..... ..... ..... ..... ..... ..... ..... ..... ..... .....                                       |      |      |      |      |      |      |      |      |      |     |
| SYM003   | ACGGAATTGGGAAGTGGATTTTACTGAGGTAAAGCCTGGGAGGTATGGGTATAAGTACTTGCTAGTAATGGTTGACACATTTTCGGGCTGGGTGGAAGCC    |      |      |      |      |      |      |      |      |      |     |
|          | ACGGAGTTGGGAAGTGGATTTTACGGAGGTAAAGCCTGGGAGGTATGGGTGTAAGTACTTGCTAGTAATGGTTGACACATTTTCTGGCTGGGTGGAAGCC    |      |      |      |      |      |      |      |      |      |     |
|          | 5210                                                                                                    | 5220 | 5230 | 5240 | 5250 | 5260 | 5270 | 5280 | 5290 | 5300 |     |
| JQ303225 | ..... ..... ..... ..... ..... ..... ..... ..... ..... ..... .....                                       |      |      |      |      |      |      |      |      |      |     |
| SYM003   | TTCCCCACGAAACGGGAGACTGCCCAAGTGGTTGCTAAGGCATTACTAGAAGAAATTAATCCAGATATGGGGTTCTGAGGTTTTAGGCTCCGATAACG      |      |      |      |      |      |      |      |      |      |     |
|          | TTCCCCACGAAACGGGAGACTGCCCAAGTGGTTGCTAAGGCATTACTAGAAGAAATTAATCCAGATATGGGGTTCTGAGGTTTTAGGTTCCGATAACG      |      |      |      |      |      |      |      |      |      |     |
|          | 5310                                                                                                    | 5320 | 5330 | 5340 | 5350 | 5360 | 5370 | 5380 | 5390 | 5400 |     |
| JQ303225 | ..... ..... ..... ..... ..... ..... ..... ..... ..... ..... .....                                       |      |      |      |      |      |      |      |      |      |     |
| SYM003   | GCCCAGCTTTTCATCAGTAACGTCTCTACAGGGACTAGCCCCGGCGATAGGGATCAATTGGAAGTTACATTGTGAATATAATCCCCAGAGCTCAGGGCAGGT  |      |      |      |      |      |      |      |      |      |     |
|          | GCCCAGCTTTTCATCAGTAACGTCTCTACAGGGACTAGCCCCGAGCGATAGGGATCAATTGGAAGTTACATTGTGAATATAATCCCCAGAGCTCAGGGCAGGT |      |      |      |      |      |      |      |      |      |     |

|          |                                                                                                         |      |      |      |      |      |      |      |      |      |  |
|----------|---------------------------------------------------------------------------------------------------------|------|------|------|------|------|------|------|------|------|--|
|          | 5410                                                                                                    | 5420 | 5430 | 5440 | 5450 | 5460 | 5470 | 5480 | 5490 | 5500 |  |
| JQ303225 | .... .... .... .... .... .... .... .... .... .... ....                                                  |      |      |      |      |      |      |      |      |      |  |
| SYMN003  | AGAGAGAATGAATCGGACTCTAAGAGGAGACCTTTGTCCAAACTAGCCATCGAGACTGGCGGGGACTGGGTGACCCCTTTACCCATGCCATCTTCCGGG     |      |      |      |      |      |      |      |      |      |  |
|          | 5510                                                                                                    | 5520 | 5530 | 5540 | 5550 | 5560 | 5570 | 5580 | 5590 | 5600 |  |
| JQ303225 | .... .... .... .... .... .... .... .... .... .... ....                                                  |      |      |      |      |      |      |      |      |      |  |
| SYMN003  | TCCGGAATCACCATATGTACATGGTTTGACACCTTCGAAATTCTGTATGGGGCACCACCCCCATTATTGTTCTACTCTACCAGATCATGACCCCAA        |      |      |      |      |      |      |      |      |      |  |
|          | 5610                                                                                                    | 5620 | 5630 | 5640 | 5650 | 5660 | 5670 | 5680 | 5690 | 5700 |  |
| JQ303225 | .... .... .... .... .... .... .... .... .... .... ....                                                  |      |      |      |      |      |      |      |      |      |  |
| SYMN003  | TGTGGCCCCAAGTTATCTGGCCAGTTTAAAGGCCCTACAGGGGTCCAAACATGAGATATGGCCCCCTAGTGAGTTCCCTGTATGAAATTAAGGACGCCCCG   |      |      |      |      |      |      |      |      |      |  |
|          | 5710                                                                                                    | 5720 | 5730 | 5740 | 5750 | 5760 | 5770 | 5780 | 5790 | 5800 |  |
| JQ303225 | .... .... .... .... .... .... .... .... .... .... ....                                                  |      |      |      |      |      |      |      |      |      |  |
| SYMN003  | AACCCGGAACATGGCATCGTTCCAGGGGATTGGGTATGGGTAAGGAGACACAGGTCCCGGACACTGGAGGAAAGATGGAAAGGTCCTTATGTGGTTATTCT   |      |      |      |      |      |      |      |      |      |  |
|          | 5810                                                                                                    | 5820 | 5830 | 5840 | 5850 | 5860 | 5870 | 5880 | 5890 | 5900 |  |
| JQ303225 | .... .... .... .... .... .... .... .... .... .... ....                                                  |      |      |      |      |      |      |      |      |      |  |
| SYMN003  | TGGTTACCCCCACTGCCTTAAAGGTTGACGGCATTGGGCCCTTGGGTCCATCACTCTCACGTGCGCCGAGCCAGCCAGCTGGAGAAGACGCAAGCTAAGGA   |      |      |      |      |      |      |      |      |      |  |
|          | 5910                                                                                                    | 5920 | 5930 | 5940 | 5950 | 5960 | 5970 | 5980 | 5990 | 6000 |  |
| JQ303225 | .... .... .... .... .... .... .... .... .... .... ....                                                  |      |      |      |      |      |      |      |      |      |  |
| SYMN003  | GTGGATCGTACGGCGACACCCCTGATAACCCCTCTGAAGCTGCAGCTCTCCCACCTCGGGGAAGCGTCAAGCCCCCTGCCTCAGCTAACGATGGAATGGTT   |      |      |      |      |      |      |      |      |      |  |
|          | 6010                                                                                                    | 6020 | 6030 | 6040 | 6050 | 6060 | 6070 | 6080 | 6090 | 6100 |  |
| JQ303225 | .... .... .... .... .... .... .... .... .... .... ....                                                  |      |      |      |      |      |      |      |      |      |  |
| SYMN003  | GCTAGCCCTAACTCTGCTCAACATCTGGGAGAAGAGCCACGCGGGGATCAACCCACACCAACCCCATAGCTAACATGGACCCCTAACAGATGGACAGACC    |      |      |      |      |      |      |      |      |      |  |
|          | 6110                                                                                                    | 6120 | 6130 | 6140 | 6150 | 6160 | 6170 | 6180 | 6190 | 6200 |  |
| JQ303225 | .... .... .... .... .... .... .... .... .... .... ....                                                  |      |      |      |      |      |      |      |      |      |  |
| SYMN003  | CAAAACAACCCCTTAATAGCACCAACATACATGCCCCCATCAATACGTGGTGGCCAGATTTGTTTTTCGACCTGCGTGACATTTTCGGCACATAAAGCTGGAC |      |      |      |      |      |      |      |      |      |  |
|          | 6210                                                                                                    | 6220 | 6230 | 6240 | 6250 | 6260 | 6270 | 6280 | 6290 | 6300 |  |
| JQ303225 | .... .... .... .... .... .... .... .... .... .... ....                                                  |      |      |      |      |      |      |      |      |      |  |
| SYMN003  | GGCAGTATGACTACTCAGTCAGGTCCAAGCGGGCTGTAAATTGACACCTCTCAAGGACATAGTGCACAAGGGTTTTGGGCCCTGCCAGGGAACCTAAGAAA   |      |      |      |      |      |      |      |      |      |  |

env

env

env

env

|          |                                                                                                         |      |      |      |      |      |      |      |      |      |     |
|----------|---------------------------------------------------------------------------------------------------------|------|------|------|------|------|------|------|------|------|-----|
|          | 6310                                                                                                    | 6320 | 6330 | 6340 | 6350 | 6360 | 6370 | 6380 | 6390 | 6400 |     |
| JQ303225 | .... .... .... .... .... .... .... .... .... .... ....                                                  |      |      |      |      |      |      |      |      |      |     |
| SYMN003  | CAATTGGAAAACTGTGGCGGCCAGACCGCTACTATTGTGGTAGTTGGAGTTGTGTCACCTCCAATGACGGGCCCGACAGTGGGACGTTGGGAACAGG       |      |      |      |      |      |      |      |      |      |     |
|          | 6410                                                                                                    | 6420 | 6430 | 6440 | 6450 | 6460 | 6470 | 6480 | 6490 | 6500 | env |
| JQ303225 | .... .... .... .... .... .... .... .... .... .... ....                                                  |      |      |      |      |      |      |      |      |      |     |
| SYMN003  | GATCTAGTCAAATTCTCCTTAGGGACCCCCCTCAACCAGGTACCCCAGGTACGTGTCCAAATTAACCAAGACGCGGCACGAAAAGAGCGTGGTTGGTTAT    |      |      |      |      |      |      |      |      |      |     |
|          | 6510                                                                                                    | 6520 | 6530 | 6540 | 6550 | 6560 | 6570 | 6580 | 6590 | 6600 |     |
| JQ303225 | .... .... .... .... .... .... .... .... .... .... ....                                                  |      |      |      |      |      |      |      |      |      |     |
| SYMN003  | CAGGATTAACTTGGGGGTTCCAATTAGATATAGGCCGTTGGGCATGGATAGGCCCCCCACCCCCGGCGGTCTCCTAACTATTCGACTATCGGTTCGAAACGAT |      |      |      |      |      |      |      |      |      |     |
|          | 6610                                                                                                    | 6620 | 6630 | 6640 | 6650 | 6660 | 6670 | 6680 | 6690 | 6700 | env |
| JQ303225 | .... .... .... .... .... .... .... .... .... .... ....                                                  |      |      |      |      |      |      |      |      |      |     |
| SYMN003  | CAGCACTCAGGTGGGTCCAAATAAGGTACTGGCTCCTCTCGTCCCTACCAAGAACCAGGTATATCAAGGGATAAGGACACCACAGGAAGGATCGCGGGA     |      |      |      |      |      |      |      |      |      |     |
|          | 6710                                                                                                    | 6720 | 6730 | 6740 | 6750 | 6760 | 6770 | 6780 | 6790 | 6800 |     |
| JQ303225 | .... .... .... .... .... .... .... .... .... .... ....                                                  |      |      |      |      |      |      |      |      |      |     |
| SYMN003  | ACCCAGCCAAAGACCTCTGTAACTCCTTCGACACCTGTACGCAGACAACCGAAGACTCATTTGCGGAACTGGTGCGCACTGTATACGAGACCCCTTAATG    |      |      |      |      |      |      |      |      |      |     |
|          | 6810                                                                                                    | 6820 | 6830 | 6840 | 6850 | 6860 | 6870 | 6880 | 6890 | 6900 | env |
| JQ303225 | .... .... .... .... .... .... .... .... .... .... ....                                                  |      |      |      |      |      |      |      |      |      |     |
| SYMN003  | CCACCAGTCCCTCACCTCACACCTCCTGTTGGCTGTGCTATGATGTAAAGCCCCCGTTCTATGAGGCAATAGGACTTAATGCCACTTACAACGCCTCTAA    |      |      |      |      |      |      |      |      |      |     |
|          | 6910                                                                                                    | 6920 | 6930 | 6940 | 6950 | 6960 | 6970 | 6980 | 6990 | 7000 |     |
| JQ303225 | .... .... .... .... .... .... .... .... .... .... ....                                                  |      |      |      |      |      |      |      |      |      |     |
| SYMN003  | CGGTAAAGAACCCCTTCTCAGTGTTCATGGGGGATCGTAAAAATTGGCTTAACCCCTGCAACTAGTGAGCGGCAATGGGACCTGTCTAGGGAAGGTGCCCCAG |      |      |      |      |      |      |      |      |      |     |
|          | 7010                                                                                                    | 7020 | 7030 | 7040 | 7050 | 7060 | 7070 | 7080 | 7090 | 7100 | env |
| JQ303225 | .... .... .... .... .... .... .... .... .... .... ....                                                  |      |      |      |      |      |      |      |      |      |     |
| SYMN003  | GCTAAACAAAGTTTATGTGCCTCCATAGACAGCTCCCCTAGTTGGAAAAAGTGACACTAAGTGGTTAATCCCCAGAAGTGTATGGATGGTGGATATGTTCAA  |      |      |      |      |      |      |      |      |      |     |
|          | 7110                                                                                                    | 7120 | 7130 | 7140 | 7150 | 7160 | 7170 | 7180 | 7190 | 7200 |     |
| JQ303225 | .... .... .... .... .... .... .... .... .... .... ....                                                  |      |      |      |      |      |      |      |      |      |     |
| SYMN003  | AGACTGGCCTCACCCCGTGCCTATCTACCTCGGTCTTTAATGCCGCCAATGAATTCTGTGTCCTAGTAACTGTGCTGCCCGCATCCTCTATCACCCCTGA    |      |      |      |      |      |      |      |      |      |     |



|          |                                                                                                       |      |      |      |      |      |      |      |      |      |  |
|----------|-------------------------------------------------------------------------------------------------------|------|------|------|------|------|------|------|------|------|--|
|          | 7210                                                                                                  | 7220 | 7230 | 7240 | 7250 | 7260 | 7270 | 7280 | 7290 | 7300 |  |
| JQ303225 | .... .... .... .... .... .... .... .... .... .... ....                                                |      |      |      |      |      |      |      |      |      |  |
| SYMN003  | GGAGAGTATGTATTTCGCATTGGGATAGTGACACAAGTACGAGAAGTAAAGAGAGCCCATCACCGCCTAACCATTTGCCACCTGTTTCAGTTTGAGAATA  |      |      |      |      |      |      |      |      |      |  |
|          | 7310                                                                                                  | 7320 | 7330 | 7340 | 7350 | 7360 | 7370 | 7380 | 7390 | 7400 |  |
| JQ303225 | .... .... .... .... .... .... .... .... .... .... ....                                                |      |      |      |      |      |      |      |      |      |  |
| SYMN003  | GCCGGAGCTGGGACCCGGCATAGCGTCCCTGGCTACTCAACAATCAGGCATAACCTCCCTAAGGGCGGCCATAGATGAGGACATAGAAAGTTGGAACCT   |      |      |      |      |      |      |      |      |      |  |
|          | 7410                                                                                                  | 7420 | 7430 | 7440 | 7450 | 7460 | 7470 | 7480 | 7490 | 7500 |  |
| JQ303225 | .... .... .... .... .... .... .... .... .... .... ....                                                |      |      |      |      |      |      |      |      |      |  |
| SYMN003  | CGATTAGTCATTTAGAGAAGTCGCTCACCTCTCTATCCGAGGTAGTACTCCAGAATAGAAGAGGACTTGATTTGTTGTTCTCCAACAAGGGGGACTGTG   |      |      |      |      |      |      |      |      |      |  |
|          | 7510                                                                                                  | 7520 | 7530 | 7540 | 7550 | 7560 | 7570 | 7580 | 7590 | 7600 |  |
| JQ303225 | .... .... .... .... .... .... .... .... .... .... ....                                                |      |      |      |      |      |      |      |      |      |  |
| SYMN003  | TGTCGCGCTAGGGGAGGAATGTTGTTTTTATGCTGACCATACTGGTGTAGTAAAAGAAATCCATGGCAAAGGTGAGAGAAGGGTTAGCTAAGAGAAAACGG |      |      |      |      |      |      |      |      |      |  |
|          | 7610                                                                                                  | 7620 | 7630 | 7640 | 7650 | 7660 | 7670 | 7680 | 7690 | 7700 |  |
| JQ303225 | .... .... .... .... .... .... .... .... .... .... ....                                                |      |      |      |      |      |      |      |      |      |  |
| SYMN003  | GAAAGGGAAGCTCAGGAGAACTGGTTTGAGGCTTGGTTTAAATAGATCCCCCTGGCTCACCACCTTAGTATCTACCTTAGTGGGCCCGGTTATCTTGCTGG |      |      |      |      |      |      |      |      |      |  |
|          | 7710                                                                                                  | 7720 | 7730 | 7740 | 7750 | 7760 | 7770 | 7780 | 7790 | 7800 |  |
| JQ303225 | .... .... .... .... .... .... .... .... .... .... ....                                                |      |      |      |      |      |      |      |      |      |  |
| SYMN003  | TGCTTATTTTAACTTTGGCCCTTGCAATTTGAACAAGCTTATTAATTTTGTGAAAGATCGTGTTAATACTGTCCAGCTCATGGTCCTAAGACAACAGTA   |      |      |      |      |      |      |      |      |      |  |
|          | 7810                                                                                                  | 7820 | 7830 | 7840 | 7850 | 7860 | 7870 | 7880 | 7890 | 7900 |  |
| JQ303225 | .... .... .... .... .... .... .... .... .... .... ....                                                |      |      |      |      |      |      |      |      |      |  |
| SYMN003  | TGAGACAGTGCCCACCCGCGAGGACCTCTACGGCTGGCCCGTACATGAGCAAGATTCCCTCATTATGAACAACAACCGCGGGGAAATGTAAGAGACCTTT  |      |      |      |      |      |      |      |      |      |  |
|          | 7910                                                                                                  | 7920 | 7930 | 7940 | 7950 | 7960 | 7970 | 7980 | 7990 | 8000 |  |
| JQ303225 | .... .... .... .... .... .... .... .... .... .... ....                                                |      |      |      |      |      |      |      |      |      |  |
| SYMN003  | AGCATGAGAACTGCTATCTTAAGGTGAGGCTTAACAGCCCCTAGCCTGAAACAACCTAATTGTAAATTGTAAGAGACCTTAGCATGAGAACTGCTATCT   |      |      |      |      |      |      |      |      |      |  |
|          | 8010                                                                                                  | 8020 | 8030 | 8040 | 8050 | 8060 | 8070 | 8080 | 8090 | 8100 |  |
| JQ303225 | .... .... .... .... .... .... .... .... .... .... ....                                                |      |      |      |      |      |      |      |      |      |  |
| SYMN003  | TAAAGTCAGGGTTAAACAGCCCCTAGCCTGAAACAACCTAATTGTAAATTCAGGATGTGGGCAGTTGCAGCACGGAGACCGAGAAGTCCTGTAGCTTATC  |      |      |      |      |      |      |      |      |      |  |

env

env

env

env

env

env

|          |                                                                            |          |            |          |          |          |          |           |           |                       |                       |
|----------|----------------------------------------------------------------------------|----------|------------|----------|----------|----------|----------|-----------|-----------|-----------------------|-----------------------|
|          | 8110                                                                       | 8120     | 8130       | 8140     | 8150     | 8160     | 8170     | 8180      | 8190      | 8200                  |                       |
|          | .... .... .... .... .... .... .... .... .... .... .... .... .... .... .... |          |            |          |          |          |          |           |           |                       |                       |
| JQ303225 | TTATA                                                                      | -----    | CTCCTTGT   | CCTGTAGT | TAAATCTT | TACTCTTT | GAACTATG | TAAGTCCT  | GTAGTTTAT | CTTATACT              | CCTTGAAGCTATGTAAGTCCT |
| SYMN003  | TTATACTCCT                                                                 | GGTCTCCT | TGTCTGTAGT | TAAATCTT | TACTCTTT | GAACTATG | CAAGTCCT | GTAGTTTAT | CTTATACT  | CTTTGAAGCTATGCAAGTCCT |                       |

  

|          |                                                        |           |            |             |           |             |            |            |          |             |
|----------|--------------------------------------------------------|-----------|------------|-------------|-----------|-------------|------------|------------|----------|-------------|
|          | 8210                                                   | 8220      | 8230       | 8240        | 8250      | 8260        | 8270       | 8280       | 8290     | 8300        |
|          | .... .... .... .... .... .... .... .... .... .... .... |           |            |             |           |             |            |            |          |             |
| JQ303225 | GTAGTTTATC                                             | TTGTACTCT | CTGAAGCTAT | GGAAAATTACT | GAGTGCCTT | GAAAATGCTAT | ATAAACCCTT | GGCTTTAAGT | TTTGGGGT | CCTTGTTAAAA |
| SYMN003  | GTAGTTTATC                                             | TAGTACTCT | CTGAAGCTAT | GGAAAATTACT | GAGTGCCTT | GAAAATGCTAT | ATAAACCCTT | GGCTTTAAGT | TTTGGGGT | CCTTGTTAAAA |

  

|          |                                                        |              |              |                  |              |             |                              |      |      |
|----------|--------------------------------------------------------|--------------|--------------|------------------|--------------|-------------|------------------------------|------|------|
|          | 8310                                                   | 8320         | 8330         | 8340             | 8350         | 8360        | 8370                         | 8380 | 8390 |
|          | .... .... .... .... .... .... .... .... .... .... .... |              |              |                  |              |             |                              |      |      |
| JQ303225 | CCCGCTGCGT                                             | CGGGCAGAGACT | CGGACCCCAGCT | GGCTGGAAATAAACCT | CGTTGTGTGACT | TGCAAAAAATA | AAAAAAAAAAAAAAAAAAAAAAAAAAAA |      |      |
| SYMN003  | CCCGCTGCGT                                             | CGGGCAGAGACT | CGGACCCCAGCT | GGCTGGAAATAAACCT | CGTTGTGTGACT | TGCA-----   |                              |      |      |
