# Supplementary material for: A Novel Coronavirus and a Broad Range of Viruses in Kenyan Cave Bats
Source: MDPI journal article supplement (doi:10.3390/v14122820), 2022-12-17
Supplement: s1 [file s1]

**Supplementary Figure S6:** Alignment of the Galidia endogenous retrovirus (GERV) sequences detected in bats. Positions are indicated according to the GERV strain AMNH-110064 (GenBank accession: KF313135).

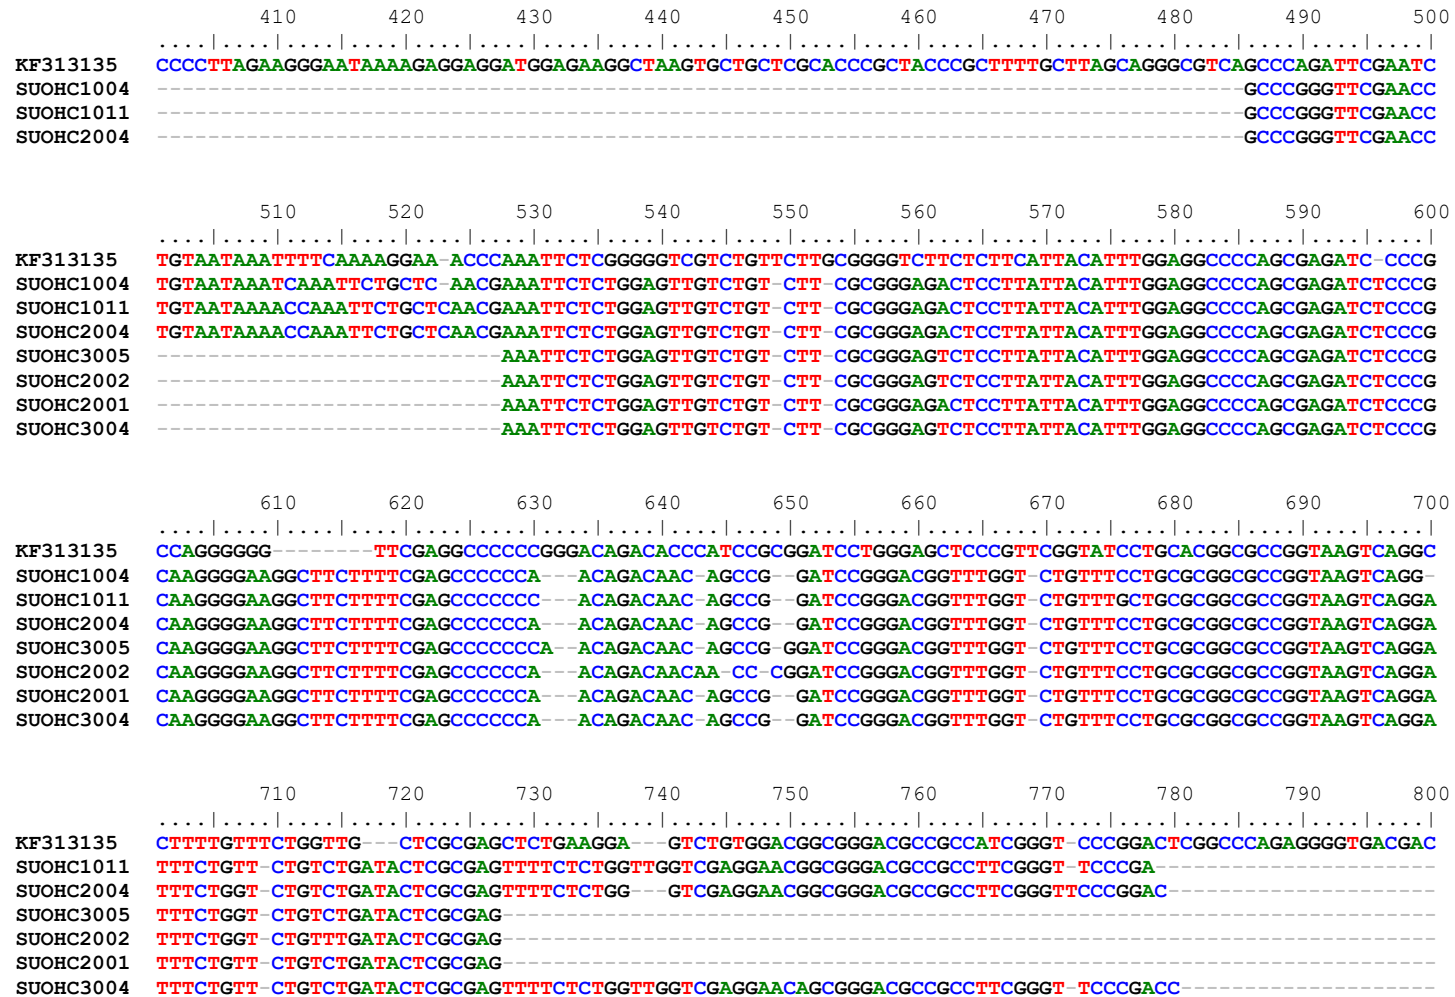

|           |                                                                                                          |      |      |      |      |      |      |      |                        |      |
|-----------|----------------------------------------------------------------------------------------------------------|------|------|------|------|------|------|------|------------------------|------|
|           | 1010                                                                                                     | 1020 | 1030 | 1040 | 1050 | 1060 | 1070 | 1080 | 1090                   | 1100 |
|           | .... .... .... .... .... .... .... .... .... .... .... .... .... .... .... .... .... .... .... .... .... |      |      |      |      |      |      |      |                        |      |
| KF313135  | GATTTCTGCGCCTGCCGCGCCGCGCTGCGATACCTTAGAACCAAAAACAGGCCCTTCTAGCACTAAGTAAGGCGGGCTGCCCTCTCCCTCTTGGCCAAG      |      |      |      |      |      |      |      |                        |      |
| SUOHC3003 |                                                                                                          |      |      |      |      |      |      |      | GTCCCTCTCCCTCTCGGCCAAG |      |
| SUOHC1003 |                                                                                                          |      |      |      |      |      |      |      | CCTCTCCCTCTCGGCCAAG    |      |
| SUOHC1006 |                                                                                                          |      |      |      |      |      |      |      | CCTCTCCCTCTCGGCCAAG    |      |
| SUOHC1014 |                                                                                                          |      |      |      |      |      |      |      | CCTCTCCCTCTCGGCCAAG    |      |
| SUOHC1001 |                                                                                                          |      |      |      |      |      |      |      | CCTCTCCCTCTCGGCCAAG    |      |
| SUOHC1002 |                                                                                                          |      |      |      |      |      |      |      | CCTCTCCCTCTCGGCCAAG    |      |
| SUOHC3007 |                                                                                                          |      |      |      |      |      |      |      | CTCCCTCTCGGCCAAG       |      |
| SUOHC3002 |                                                                                                          |      |      |      |      |      |      |      | CAAG                   |      |

|           |                                                                                                          |      |      |      |      |      |      |      |      |      |
|-----------|----------------------------------------------------------------------------------------------------------|------|------|------|------|------|------|------|------|------|
|           | 1110                                                                                                     | 1120 | 1130 | 1140 | 1150 | 1160 | 1170 | 1180 | 1190 | 1200 |
|           | .... .... .... .... .... .... .... .... .... .... .... .... .... .... .... .... .... .... .... .... .... |      |      |      |      |      |      |      |      |      |
| KF313135  | ATGGGACAAGGCAGCTCTAAGGGCCCATTTGAGCCCATTTGGAATGTCTGATTAAAACTTCTCCGATTTTCGGAAATCGAGCCGCGGGATACGGGGCAACAG   |      |      |      |      |      |      |      |      |      |
| SUOHC3003 | ATGGGACAGGGCGACTCAAAGGGCCCCCTTGAGCCCCCTTAGAATGCCTAATTAAGAATTTTGATGACTTCGCCGCCGCGCGGACGGGTACGGGGCGCCCCG   |      |      |      |      |      |      |      |      |      |
| SUOHC1003 | ATGGGACAGGGCGACTCAAAGGGCCCCCTTGAGCCCCCTTAGAATGCCTAATTAAGAATTTTGATGACTTCGCCGCCGCGCGGACGGGTACGGGGCGCCCCG   |      |      |      |      |      |      |      |      |      |
| SUOHC1006 | ATGGGACAGGGCGACTCAAAGGGCCCCCTTGAGCCCCCTTAGAATGCCTAATTAAGAATTTTGATGACTTCGCCGCCGCGCGGACGGGTACGGGGCGCCCCG   |      |      |      |      |      |      |      |      |      |
| SUOHC1014 | ATGGGACAGGGCGACTCAAAGGGCCCCCTTGAGCCCCCTTAGAATGCCTAATTAAGAATTTTGATGACTTCGCCGCCGCGCGGACGGGTACGGGGCGCCCCG   |      |      |      |      |      |      |      |      |      |
| SUOHC1001 | ATGGGACAGGGCGACTCAAAGGGCCCCCTTGAGCCCCCTTAGAATGCCTAATTAAGAATTTTGATGACTTCGCCGCCGCGCGGATGGGTACGGGGCGCCCCG   |      |      |      |      |      |      |      |      |      |
| SUOHC1002 | ATGGGACAGGGCGACTCAAAGGGCCCCCTTGAGCCCCCTTAGAATGCCTAATTAAGAATTTTGATGACTTCGCCGCCGCGCGGACGGGTACGGGGCGCCCCG   |      |      |      |      |      |      |      |      |      |
| SUOHC3007 | ATGGGATAGGGCGACTCAAAGGGCCCCCTTGAGCCCCCTTAGAATGCCTAATTAAGAATTTTGATGACTTCGCCGCCGCGCGGATGGGTACGGGGCGCCCCG   |      |      |      |      |      |      |      |      |      |
| SUOHC3002 | ATGGGACAGGGCGACTCAAAGGGCCCCCTTGAGCCCCCTTAGAATGCCTAATTAAGAATTTTGATGACTTCGGCTGCCGCCGCGGACGGGTACGGGGCGCCCCG |      |      |      |      |      |      |      |      |      |

|           |                                                                                                          |      |      |      |      |      |      |      |      |      |
|-----------|----------------------------------------------------------------------------------------------------------|------|------|------|------|------|------|------|------|------|
|           | 1210                                                                                                     | 1220 | 1230 | 1240 | 1250 | 1260 | 1270 | 1280 | 1290 | 1300 |
|           | .... .... .... .... .... .... .... .... .... .... .... .... .... .... .... .... .... .... .... .... .... |      |      |      |      |      |      |      |      |      |
| KF313135  | TGAATGCTTTTCGACCTGCGAAAAATCTGTGAGTTGGAATGGCCACCTTTGGGGTCGGATGGCCAGGTGTGGGGACCCCTGGATGTAGGCACGG-CCAGTG    |      |      |      |      |      |      |      |      |      |
| SUOHC3003 | TCAATGCTTTTGATTTGAGAAAAATCTGTGAGAGGGAGTGGCCACGTTTGGGGTCGGCTGGCCAGACATAGGGACCTTTGATCTGGCGACGGTCCAG-G      |      |      |      |      |      |      |      |      |      |
| SUOHC1003 | TCAATGCTTTTCGATTTGAGAAAAATCTGTGAG- - - - -                                                               |      |      |      |      |      |      |      |      |      |
| SUOHC1006 | TCAATGCTTTTCGATTTGAGAAAAATCTGTGAGAGGGAGTGGCCACGTTTGGGGTCGGCTGGCCAGACATAGGGACCTTTGATCTGGCGACGG-TCCAGG     |      |      |      |      |      |      |      |      |      |
| SUOHC1014 | TCAATGCTTTTGATTTGAGAAAAATCTGTGAGAGGGAGTGGCCACGTTTGGGGTCGGCTGGCCAGACATAGGGACCTTTGATCTGGCGACGG-TCCAGG      |      |      |      |      |      |      |      |      |      |
| SUOHC1001 | TCAATGCTTTTGATTTGAGAAAAATCTGTGAGAGGGAGTGGCCACGTTTGGGGTCGGTTGGCCAGACATAGGGACCTTTGATCTGGCGACGG-TCCAGG      |      |      |      |      |      |      |      |      |      |
| SUOHC1002 | TCAATGCTTTTGATTTGAGAAAAATCTGTGAGAGGGAGTGGCCACGTTTGGGGTCGGCTGGCCAGACATAGGGACCTTTGATCTGGTGACGG-TCCAGG      |      |      |      |      |      |      |      |      |      |
| SUOHC3007 | TCAATGCTTTTGATTTGAGAAAAATCTGTGAGAGGGAGTGGCCACGTTTGGGGTCGGTTGGCCAGACATAGGGACCTTTGATCTGGCGACGGTCCAG-G      |      |      |      |      |      |      |      |      |      |
| SUOHC3002 | TCAATGCTTTTGATTTGAGAAAAATCTGTGAGAGGGAGTGGCCACGTTTGGGGTCGGYTGGCCAGACATAGGGACCTTTGATCTGGCGACGGTCCAG-G      |      |      |      |      |      |      |      |      |      |

|           |                                                                                                          |      |      |      |      |      |      |      |      |      |
|-----------|----------------------------------------------------------------------------------------------------------|------|------|------|------|------|------|------|------|------|
|           | 1310                                                                                                     | 1320 | 1330 | 1340 | 1350 | 1360 | 1370 | 1380 | 1390 | 1400 |
|           | .... .... .... .... .... .... .... .... .... .... .... .... .... .... .... .... .... .... .... .... .... |      |      |      |      |      |      |      |      |      |
| KF313135  | CGGTCCGTGCTGTT-TGCTACAGCACCCCTGGCCATCCTGACCAGGTCCCTTACATAGACATCTGGATTGACATCATCTGGGACAGGCCCGGTTATCTGA     |      |      |      |      |      |      |      |      |      |
| SUOHC3003 | CGGTTCAG-GCGGACATGTTATGGAAATCCTGGGCACCCAGACCAATCCCGTA                                                    |      |      |      |      |      |      |      |      |      |
| SUOHC1006 | CGGTTC- - - - -                                                                                          |      |      |      |      |      |      |      |      |      |
| SUOHC1014 | CGGTTC- - - - -                                                                                          |      |      |      |      |      |      |      |      |      |
| SUOHC1001 | CGGTTC- - - - -                                                                                          |      |      |      |      |      |      |      |      |      |
| SUOHC1002 | CGGTTC- - - - -                                                                                          |      |      |      |      |      |      |      |      |      |
| SUOHC3007 | CGGTTCAG-GCGGACATGTTATGGAAATCCTGGGCACCCAGACC                                                             |      |      |      |      |      |      |      |      |      |
| SUOHC3002 | CGGTTCAG-GCGGACATGTTATGGAAATCCTGGGCACCCAGACCAAT                                                          |      |      |      |      |      |      |      |      |      |

|           |                                                                                                           |       |       |       |       |       |       |       |       |       |
|-----------|-----------------------------------------------------------------------------------------------------------|-------|-------|-------|-------|-------|-------|-------|-------|-------|
|           | 2510                                                                                                      | 2520  | 2530  | 2540  | 2550  | 2560  | 2570  | 2580  | 2590  | 2600  |
| KF313135  | .....                                                                                                     | ..... | ..... | ..... | ..... | ..... | ..... | ..... | ..... | ..... |
| SUOHC1005 | ACCGCTCTAGGGAAGAACCAATGTGCCTACTGCAAGGAGGAAGGACATTGGAAGAGAGAAATATTCCTAAACGCCCTCGGGAGGGAGAGGGCCACCCCAACC    |       |       |       |       |       |       |       |       |       |
| SUOHC1007 | -----GCTTATTGTCAGGAAGAAGGACACTGGAAGAGAGAGTGCCCAAAAAGACCCA--AGGCTGAGGCTCCGCCAGCCC                          |       |       |       |       |       |       |       |       |       |
|           | 2610                                                                                                      | 2620  | 2630  | 2640  | 2650  | 2660  | 2670  | 2680  | 2690  | 2700  |
| KF313135  | .....                                                                                                     | ..... | ..... | ..... | ..... | ..... | ..... | ..... | ..... | ..... |
| SUOHC1005 | CGGTCCCTGGTCAAAGAGACGGACTAGAGAACTCGGGGCTCCCTC-GCCCTCCAGGAACCCAGGCTAAAACTCTCGGTAGGAGGGCAACTGATTGATTTCT     |       |       |       |       |       |       |       |       |       |
| SUOHC1007 | CAGTATTGGTAGAAGAGGAAGACTAGGGCCGCCGTGGGGCC-TCAGTCCTCCGGGAACCCAGGCTAAAACTCTCGGTAGGGGGACAAATGATTGACTTTT      |       |       |       |       |       |       |       |       |       |
|           | 2710                                                                                                      | 2720  | 2730  | 2740  | 2750  | 2760  | 2770  | 2780  | 2790  | 2800  |
| KF313135  | .....                                                                                                     | ..... | ..... | ..... | ..... | ..... | ..... | ..... | ..... | ..... |
| SUOHC1005 | TGGTGGATACCGGGGCCACCCATTCTGTGTGACAGCGCCAGTTGGGCCC-CTCACCCCTGAGCGGGTCAGAAATTATAGGGGCCACTGGGATATCCAAA       |       |       |       |       |       |       |       |       |       |
| SUOHC1007 | TAGTGGACACCGGGGCCACTCATTCGGTAGTTCAAGCCCTGTGGGCCCTACTCAGGCCAAAA--GGTGAGAATCGTAGGAGCCACTGGAACCTCCTCAG       |       |       |       |       |       |       |       |       |       |
|           | 2810                                                                                                      | 2820  | 2830  | 2840  | 2850  | 2860  | 2870  | 2880  | 2890  | 2900  |
| KF313135  | .....                                                                                                     | ..... | ..... | ..... | ..... | ..... | ..... | ..... | ..... | ..... |
| SUOHC1005 | AGCTACCCCAAACTCGGAGGGTCGAAATCAGCGGACCTGGGTAAAGGACTCTTAACCCCACTCCTTCCTTGTGATACCCGAATGTCCTGACCCACTGCTGGGAA  |       |       |       |       |       |       |       |       |       |
| SUOHC1007 | ACCTACCCCACTCTGAGGGCCGGATCACCAACTGAGCCAGGGTACTGTACCCCACTCCTTCCTCGTTATACCGGAATGCCCGGACCTCTCCTGGGTA         |       |       |       |       |       |       |       |       |       |
|           | 2910                                                                                                      | 2920  | 2930  | 2940  | 2950  | 2960  | 2970  | 2980  | 2990  | 3000  |
| KF313135  | .....                                                                                                     | ..... | ..... | ..... | ..... | ..... | ..... | ..... | ..... | ..... |
| SUOHC1005 | GGGACCTCCTCCACAAGCTCAGGGCCACCATCACCTTCGATGGGGTAGGGACTCCAGAGGTAAAAACTGAAGGGAAGTCCCTCGTGACCTTTGCCCTTGGC     |       |       |       |       |       |       |       |       |       |
| SUOHC1007 | GAGATTGTGTACACAAGTTACAGGCCACCAT-----GAGATTGTGTACACAAGTTGAGGCCACCAT-----                                   |       |       |       |       |       |       |       |       |       |
|           | 3210                                                                                                      | 3220  | 3230  | 3240  | 3250  | 3260  | 3270  | 3280  | 3290  | 3300  |
| KF313135  | .....                                                                                                     | ..... | ..... | ..... | ..... | ..... | ..... | ..... | ..... | ..... |
| SUOHC3006 | GGGGAGTACGCGAGAATATCCGAAAACTAAGGGCGGGCCGCATCCTAGTTCCGTGCCACTCGCCCTGGAAACACCCCCCTACTCCCAGTTCGAAAGGCCGA     |       |       |       |       |       |       |       |       |       |
|           | 3310                                                                                                      | 3320  | 3330  | 3340  | 3350  | 3360  | 3370  | 3380  | 3390  | 3400  |
| KF313135  | .....                                                                                                     | ..... | ..... | ..... | ..... | ..... | ..... | ..... | ..... | ..... |
| SUOHC3006 | GACTGGACAATACCGGATGGTCCAAGACTTAAGAGAGGTTGAATAAAAGGGTGGAAACCATTACCCCAACGGTTCTTAACCCCTTACACCTTCTTAGCCTC     |       |       |       |       |       |       |       |       |       |
|           | 3410                                                                                                      | 3420  | 3430  | 3440  | 3450  | 3460  | 3470  | 3480  | 3490  | 3500  |
| KF313135  | .....                                                                                                     | ..... | ..... | ..... | ..... | ..... | ..... | ..... | ..... | ..... |
| SUOHC3006 | CTGCCCCCGGATCACATCTGGTATAGGCTACTCGACCTTAAGGACGCCCTTCTTCTGCCCTCCCTCTGGCCCCCTGGGAGTCAACCATTTGTTTGCCTTTGAAAT |       |       |       |       |       |       |       |       |       |
|           | 3510                                                                                                      | 3520  | 3530  | 3540  | 3550  | 3560  | 3570  | 3580  | 3590  | 3600  |
| KF313135  | .....                                                                                                     | ..... | ..... | ..... | ..... | ..... | ..... | ..... | ..... | ..... |
| SUOHC3006 | GGAGTGACCCAGAAAGAGGGGAGTCAGGACAATTAACATGGACCCGGCTGCCCAAGGGTTCAAAAACCTACCCACCCCTATTTGACGAGGCCCTCAGCCA      |       |       |       |       |       |       |       |       |       |
|           | 3810                                                                                                      | 3820  | 3830  | 3840  | 3850  | 3860  | 3870  | 3880  | 3890  | 3900  |
| KF313135  | .....                                                                                                     | ..... | ..... | ..... | ..... | ..... | ..... | ..... | ..... | ..... |
| SUOHC3001 | GGCTAAAAGGAGGGACTAGGACCCCTAACAGAAAGCCGAATAAAAGCGATCGTCCAGATTCCCTCTCCCCAAAACCAAGAGACAGGTACGCGAGTTCTTGGG    |       |       |       |       |       |       |       |       |       |
|           | -----GGGAAGAGGACACTGGCTAACAGCCGGATCCAAGCCATTCTACAGATCCCCGCCCCCAACCACTAAGAGGCAAGTCAGGGAATTCTTAGG           |       |       |       |       |       |       |       |       |       |

|           |                                                                                                          |      |      |      |      |      |      |      |      |      |
|-----------|----------------------------------------------------------------------------------------------------------|------|------|------|------|------|------|------|------|------|
|           | 3910                                                                                                     | 3920 | 3930 | 3940 | 3950 | 3960 | 3970 | 3980 | 3990 | 4000 |
| KF313135  | .... .... .... .... .... .... .... .... .... .... .... .... .... .... .... .... .... .... .... .... .... |      |      |      |      |      |      |      |      |      |
| SUOHC3001 | CACGGTCGGGTACTGCAGGCTGTGGATCCCGGGGTTTCGCAGAACTAGCCGAAGCCCTGTCATGCAGTAGCCGGAGGGGGTGCCAGACCCCTGACATGGACT   |      |      |      |      |      |      |      |      |      |
|           | 4010                                                                                                     | 4020 | 4030 | 4040 | 4050 | 4060 | 4070 | 4080 | 4090 | 4100 |
| KF313135  | .... .... .... .... .... .... .... .... .... .... .... .... .... .... .... .... .... .... .... .... .... |      |      |      |      |      |      |      |      |      |
| SUOHC3001 | AAGACCGAAGAAGAGGCATTCCAGGCCCTAAAGAGCGCTCTCCCTGCAAGCCCCAGCTCTCAGCCTCCCCGACCTTGAAAAGCCCTTCCAGTTATTTGTGG    |      |      |      |      |      |      |      |      |      |
|           | 4110                                                                                                     | 4120 | 4130 | 4140 | 4150 | 4160 | 4170 | 4180 | 4190 | 4200 |
| KF313135  | .... .... .... .... .... .... .... .... .... .... .... .... .... .... .... .... .... .... .... .... .... |      |      |      |      |      |      |      |      |      |
| SUOHC3001 | CAGAGAACAAGGGGGTAGCAAAAGGGGTGCTCACCCAAAGGATAGGGCCCTGGAAAAGACCAGTAGCCTACCTCTCAAGAAAACTAGACCCAGTAGCTGC     |      |      |      |      |      |      |      |      |      |
|           | 4210                                                                                                     | 4220 | 4230 | 4240 | 4250 | 4260 | 4270 | 4280 | 4290 | 4300 |
| KF313135  | .... .... .... .... .... .... .... .... .... .... .... .... .... .... .... .... .... .... .... .... .... |      |      |      |      |      |      |      |      |      |
| SUOHC3001 | TGGATGGCCTGGATGCCTACGGGCCATCGCAGCCGCTGCCCTCCTGGTCAAGGAAGCATCAAAACTCACCTTTGGACAAAACCTAGAGGTCACTTCGGCC     |      |      |      |      |      |      |      |      |      |
|           |                                                                                                          |      |      |      |      |      |      |      |      |      |
|           | CGGATGGCCAGGTTGCTCCGAGCCATCGCGCGGCAGCCATTCTTGTAAGGAAGCCACTAAGCTGACCTTTGG-----                            |      |      |      |      |      |      |      |      |      |
