# Supplementary material for: A Novel Coronavirus and a Broad Range of Viruses in Kenyan Cave Bats
Source: MDPI journal article supplement (doi:10.3390/v14122820), 2022-12-17
Supplement: s1 [file s1]

**Supplementary Figure S7:** Alignment of the murine leukemia virus-related virus (MLRV) sequences detected in bats. Positions are indicated according to the MLRV strain TaEV (GenBank accession: X99934).

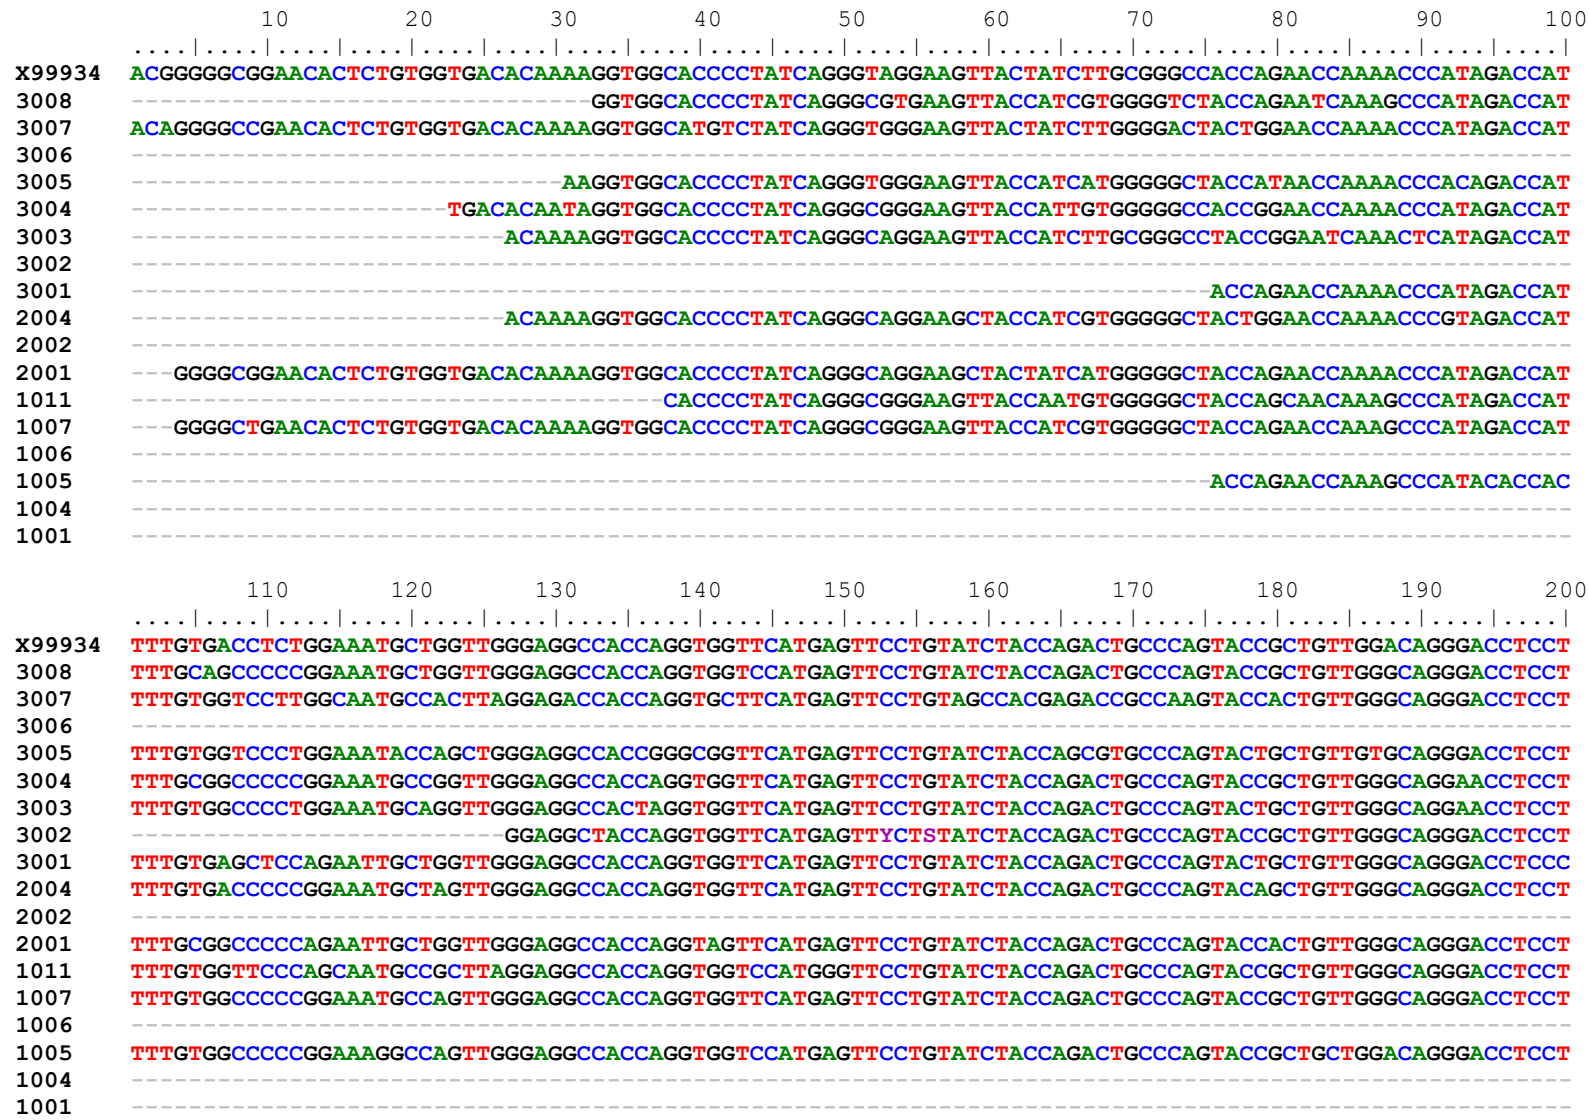



3005 CCCC**TGGTCTGGGCAAAAACCATGCCCCGATACTGATTGACCTGAAGCCTTGAGCCCAGCCTGTCAAAATACGCCAGTACATGGTTCCGCGGGAAGCAC**A  
 3004 -----  
 3003 CCCC**TGGC**----**CAAAAACCATGCCCCAATCCTGATTGACCTGAAGCCTGGAGCCCAACCTGTCAAAATATGCCAGTACATGGTTCCGCGGGAAGCACG**  
 3002 CCCC**TGGTCTGGCCAAAACCCACACCCCGATCCTGATTGACCTGAAGCCTGGAGCCCAGCCTGTGAAAATACACCAGTACATGGTTCTATGGGAAGCGTG**  
 3001 -----  
 2004 CCCC**TGGC**--**GCCAAAACCATGCCCCAATCCTGATTGACCTGAAGCCTGGAGCCCAACCTGTCAAAATACGCCAGTACATGGTTCCACGGGAAGCACG**  
 2002 -----  
 2001 CCCC**TGGTATGGCCAAAACCATACCCCAATCCTGATTGACCTGAAGCCTGGAGCCCAGCCTGTCAAAATATGCCAGTACATGGTTCTGTGGGAAGCAC**A  
 1011 CCCC**TGGTCTGGCCAAAACCATGCCCCGATACTGAATGACCTGAAGCCTGGAGCCTGGCCTGTCAAAATACGCCAGTACATGGTTCTGCGGGAAGTGC**G  
 1007 CCCC**TGGC**----**CAAAAACCCACACCCCAATACTGATTGACCTGAAGCCTGGAGCCCAACCTGTCAAAATACGCCAGTACATGGTTCCGCGGGAAGTGC**G  
 1006 -----  
 1005 CCCC**AGGTC****AATCAGGAGTGGGGC**--**ATGGTTTTTGGCCAGAAGCCTGGGGGGCAACCTGTCCAAATACACCAGTACATGGTTCCATGGGAAGCACG**  
 1004 -----  
 1001 -----**CAATAACCATGTCCCAATCCTGTTTGACCTGAAGCCTGGAGCCTAACCTGTATAAATGCGCCAGTACATGGTTCCGCAGGAAGCAC**A

510 520 530 540 550 560 570 580 590 600

X99934 ....|....|....|....|....|....|....|....|....|....|....|....|....|....|....|....|....|....|....|....|....|  
 3008 TCTAGGGATCCAGATTCACCTAGACCGATTACTCAAGTGGGAC**TTTTTAAAGCAATGCCAGTCCCCATGGAAACACCCCTCTGCTGCCCATAAAGAAACCT**  
 3007 TCTAGGGATCCAGATTCACCTAGACCGATTACTCAAGTGGGGAC**TTTTTAAAGCAATGCCAGTCCCCATGGAAACACCTCCTTGCTGCCTGTAAAGAAACCT**  
 3006 TCTAGGGATCCAGATTCACCTAGACCAAGTACTCAAGTGGGGAC**TTTTTAAAGCGATGCCAGTCCCCATGGAAACACCCCTCTGCTGCCCATAAAGAAACCT**  
 3005 TCTAGTGATCCAGATTCACCTAGACCAACTACTCAGTGGGGAC**TTTTTAAAGTCAATGTCAGTCCCCATGGAAACACCCCTGCTGCCTGTAAAGAAACCTG**  
 3004 -----  
 3003 TCTAGGGATCCAGATTCACCTAGACCGACTACTCAAGTGGGGAC**TTTTTAAAGCGATGCCAGTCCCCATGGAAACACCCCTCTGCTGCCCATAAAGAAACCT**  
 3002 TCTAGGGATCCAGATTCACCTAAACTGACTACTCAAGTGGGGAC**TTTCAAAGC**-----  
 3001 -----  
 2004 TCTAGGGATCCAGATTCACCTAGACCGACTACTCAAGTGGGGAC**TTTTTAAAGCAATGCCAGTCCCCATGGAAACACCCCTCTGCTGCCGTAAAGAAACCT**  
 2002 -----**TGCCAGTCCCCATGGAAACACCCCTCTGCTGCCTGAAAAGAAACCT**  
 2001 TCTAGGGATCCAGATTCACCTAGACCGACTACTCAAGTGGGGAC**TTTTTAAAGCGATGCCAGTCCCCATGGAAACACCCCTCTGCTGCCCATAAAGAAACCT**  
 1011 TCTAGGGATCCAGATTCACCTATACCAAGAACTCAAGTAGGAAC**TTTCAAAGCAATGCCAGTCTTCGTGGAAACATCCACCTGCTGCCCGTAAAGAAACCT**  
 1007 TCTAGGGATCCAGATTCACCTAGACCAACTACTCAAGTGGGGAC**TTTTTAAAGCAATGCCAGTCCCTGTGGAAACACCCCTCTGCTGCCCATAAAGAAACCT**  
 1006 -----**CACCTAGACCAACTACTCAGTGGGGACTTTTAAGTCAATGTCAGTCCCCATGGAAACACCCCTCTGCTGCCCATAAAGAAACCT**  
 1005 TCTAGGGATCCAGATTCACCTAGACTGACTACTCAAGTGGGGAC**TTTTTAAAGCGATGCCAGTCCCTGTGGAAACACCCCTCTGCTGCCCATAAAGAAACCTG**  
 1004 -----**AGTCCCCGAGGGACACACCCCTGCTGCCTGTAAAGAAACCT**  
 1001 TCTAGGGATCCAGATTCACCTAGACTGACTACTCATATGGGGAC**TGGTAAAGCAATGCAAGTCCCCATGGAAACACCCCTCTGCTGCCCATAAAGAAACCT**

610 620 630 640 650 660 670 680 690 700

X99934 ....|....|....|....|....|....|....|....|....|....|....|....|....|....|....|....|....|....|....|....|....|  
 3008 GGGACAAAC**GACTACCGCCCGTACAAGACTTAAGGGCCATTAATGAAGTGGTCATCATGTTGCATTTGACACTGCCTAACCCTACACTCTATTAGGAC**  
 3007 GGGACAAAT**GACTACCGCCCGGTATAAGACTTAAGGGCCATTAATGAAGTGGTCATCATGTTGCATTTCGGCACTGCCTAACCCTACACTCTATTAGGAC**  
 3006 GGGACAAAC**GACTACCGCCCGGTACAAGACTTAAGGGCCATTAATGAAGCGGTCAATCACGTTGCATTTCGGCACTGCCTAACCCTACACTCTGTATTGGAC**  
 3005 GGACAAA-----  
 3004 -----  
 3003 GGGACAAAC**GACTACCGCCTGGTACAAGACTTAAGGGCCATTAATGAAGTGGTCATCACGTTGCATTTGGCACTGCCTAACCCTACACTCTATTAGGAC**  
 3002 -----  
 3001 -----  
 2004 GGGACAAAC**GACTACCGCCCGGTACAAGACTTAAGGGCCATTAATGAAGTGGTCATCACGTTGCATTTCGGCACTGCCTAACCCTACACTCTATTAGGAC**

2002 GACATAAAATGACTACCTCTCAGTACAACACTTAACAGCCATTAAAGGCGGTTCATCACGTTGCATTTCAGCACTGCCTAACCCATACACTCTATTAGGAC  
2001 GGGACAAATGACTACCGCCTGGTACAAGACTTAAGGGCCATTAAATGAAGCGGTCAATACGTTGCATTTCGGCACTGCCTAACCCATACACTCTATTAGGAC  
1011 GGGACAAACGACTACCGTCAGGTAAAAGACTTAAGGGCCATTAAATGAAGCGGTCAATACGTTGCATTTCGGCACTGCCTAACCCATACACTCTATTAGGAC  
1007 GGGACAAATGACTACCAACCCGGTACAAGACTTAAGGGCCATTAAATGAAGTGGTTCATCACGTTGCATTTCGGCACTGCCTAACCCATACACTCTATTAGGAC  
1006 GGGACAAATGACTACTGCCAGTACATGACTTAAGGGCCATTAAATGAAGCGGTCAACCACTTCATTTCGGCACTGCCTAACCCAAACACTCTATTAGGAC  
1005 GGGACAAACGACTACCGCCCGGTACAAGACTTAAGGGCCACTAATGAGGCGGTTCATCATGTTGCATTTCGGCACTGCCTAACCCATACACTCTATTAGGAC  
1004 GGGACAAACGACTAACGCCCCGTACAAGACTTAAGGGTCTTTAAATGAGGAGGTTCATCACATTGCATTAAAGCACTGCCTAACCCACACACTCTATAAGGAC  
1001 GGGACAAATGACTACCGCCCCGGTACAAGACTTAAGGGCCATTAAATGAAGCGGTTCATCACGTTGCATTTCGGCACTGCCTAACCCATACACTCTATTAGGAC

710 720 730 740 750 760 770 780 790 800  
....|....|....|....|....|....|....|....|....|....|....|....|....|....|....|....|....|....|....|....|....|  
X99934 TTATACCTTCTGAGGCAGGGTGGTTTACATGCCTGGACTTAAAGGATGCCCTCTTCTGTCTCCAGCTAGCACCCAATAGCCAGCCTCTGTTGCGCTTCAA  
3008 TTATACCTTCTGAGGCAGGGTGGTTTACATGCCTGGACTTAAAGGATGCCCTTTTCTGCCTCCATCTAGCACCCAATACCCAGCCTCTGTTTACCTTCGA  
3007 TTATAGCTTCTGAGGCAGGGTGGTTTACATGCCTGGACTTAAAGGATGCCCTCTTCTGCCTCCAACCTAGCACCCAATAGCCAGCCTCTGTTGCGCTTCAA  
3006 TTATTGTTCTGTGGCAGGGTGGTTTACATGCCTGGGCTTAAAGGATGCCCTCTTCTGCCTCCAACCTAGCGCCCAATAGCCAGCCTCTGTTGCGCTTGA  
3005 -----  
3004 -----  
3003 TTATACCTTCTGAGGCAGGGTGGTTTACATGCCTGGACTTAAAGGATGCCCTCTTCTGCCTCCAACCTAGCGCCCAATAGCCAGCCTCTGTTAGCCTTCGA  
3002 -----  
3001 -----  
2004 TTATACCTTCTGAGGCAGGGTGGTTTACATGCCTGGACTTAAAGGATGCCCTCTTCTGCCTCCAACCTAGCGCCCAATAGCCAGCCTCTGTTCCCTTCGA  
2002 TTATACCTTCTGAGGCAGGGTGGTTTACATGCCTGGACTTAAAGGATGCCCTCTTCTGCCTCCAACCTAGCGCCCAATAGCCAGCCTCTGTTGCGCTTCGA  
2001 TTACACCTTCTGAGGCAGGGTGGTTTACATGCCTGGACTTAAAGGATGCCCTCTTCTGCCTCCAACCTAGCGCCTAATAGCCATCCTCTGTTGCGCTTCGA  
1011 CTATACCTTCTGAGGCAGGGTGGTTTACATGCCTGGACTTAAAGGATGCCCTCTTCTGCCTCCAGCTAGCACCCAATAGCCAGCCTCTGTTGCGCTTCGA  
1007 TTATACCTTCTGAGGCAGGGTGGTTTACATGCCTGGACTTAAAGGATGCCCTCTTCTGCCTCCAACCTAGCACCCAATAGCCAGCCTCTGTTTACCTTCAA  
1006 TCATACCTTCTGAGGCAGAGTGGTTTACATGCCTGGACTTAAAGGATGCCCTCTTCTGCCTCCAACCTAGCACCCAATAGCCAGCCTCTGTTGCGCTTCGA  
1005 TTATACCTTCTGAGGCAGGGTGGTTTACATGCCTGGACTTAAAGGATGCCCTCTTCTGCCTCCAGCTAGTGCCTAATAGCCAGYCTCTGTTTACCTTCGA  
1004 TTACACCTTCTGAGGCAGGGTGCTTACATGCCTGGACTTAAAGGATGCCCTCTTCTGCCTCCAACCTAGCGTCCAATAGCCAGCCTCTGTTTGCCTTCGA  
1001 TTATACCTTCTGAGGCAGGGTGGTTTACATGCCTGGACTTAAAGGATGCCCTCTTCTGCCTCCAACCTAGTGCCTAATAGCCAGCCTCTGTTTACCTTGA

810 820 830 840 850 860 870 880 890 900  
....|....|....|....|....|....|....|....|....|....|....|....|....|....|....|....|....|....|....|....|....|  
X99934 ATGGGAAAGCCCCACCACAGGAACAAAGGAACAATTCACCTCGGACTAGACTACCTCAAGGATTCAAGAATTACCAACTTTGTTTTCAGTGGGGCACTAGCG  
3008 ATGGGAAAACCTCACCACAGGAACAAAGGAACAATTCACCTTGGAAATAGACTACCTCAAGGATTCAAGAATTCACTCAACTTTGTTTTCAGCAGGGCACTAGCG  
3007 ATGGGAAAACCCCCACCACAGGAACAAAGGAACAATTCACCTTGGAACTAGAAAT--TCAAGGATTCAAGAATTCACTCAACTTTGTTTTCAGCGGGCACTAGCG  
3006 ATGGGAAAACCCCCACCACAGGAACAAAGGAACAATTCACCTTGGAACTAGACTACCTCAAGGATTCAAGAATTACCAACTTTGTTTTCAGCGGGCACTAGCG  
3005 -----  
3004 -----  
3003 ATGGGAAAACCCCCACCACAGGAACAAAGGAACAATTCACCTTGGAACTAGACTACCTCAAGGATTCAAGAATTACCAAGCTTTGTTTTCAGTGGGGCCCTAGCG  
3002 -----  
3001 -----  
2004 ATGGGAAAACACCACAAAGGAACAAAGGAACAATTCACCTTGGAACTAGACTACCCCAAGGATTCAAGAATTACCAACTTTGTTTTCAGCGGGGCACTAGCA  
2002 ATGGGAAAACCCCCACCACAGGAACAAAGGAACAATTCACCTTGGAACTAGACTACCCCAAGGATTCAAGAATTACCAAGCTTTGTTTTCAGCGGGGCACTAGCG  
2001 ATGGTAAACCCCCACCACAGGAACAAAGGAACAATTCACCTTGGAACTAGACTACCTCAAGGATTCAAGAATTACCAACTTTGTTTTCAGTGGGGCACTAGCA  
1011 ATGGGAAAACCCCCACCACAGGAACAAAGGAACAATTCACCTTGGAACTAGACTACCTCAAGGATTCAAGAATTACCAACTTTGTTTTCAGCAGGGCACTAGCA  
1007 ATGGGAAAACCCCCACCACAGGAACAAAGGAACAATTCACCTTGGAACTAGACTACCTCAAGGATTCAAGAATTACCAAGCTTTGTTTTCAGTGGGGTGTAGCG  
1006 ATGGGAAAACCTCCACCACAAACGAAGGAACAATTCACCTTGGAACTAGACTACCCCAAGGATTCAAGAATTGCAACTTTGTTTTCAGTGGGGCACTAGCG  
1005 ATGGGAACCCCCACCACAGGAACAAAGGAACA-----

1004 ATGGGAAAACCCACCCACAGGAACAAAGGAACAATTACACTTGGACTAGACTACCCCAAGGATTCAAGAATTCACCAACTTTGTTCAAGTGGGGCACTAGCG  
1001 ATGGGAAAATCCCACCATAGGAACAAAGGAACAATTACACTTGGACTCAACTACCCCAAGGATTCAAGAATTCACCAGCTTTGTTAGCAAGACACTGGCG

                  910          920          930          940          950  
....|....|....|....|....|....|....|....|....|....|....|...  
x99934 TCTGACTTAGCCAAGTTCCCGGGACTGAACGTAGGATGTGTCTCCTCCAGTACGTC  
3008 TCTGACTTAGCCAAGTTCCCGGGCTGGAACTTAGGATGTGTCTC-----  
3007 TC-----  
3006 TCTGACTTAGCCAAGTTCTTGGGACAGAACTTAGGATGTGTCTCCTCCAATATGT-  
3005 -----  
3004 -----  
3003 TCTGACTTAGCCAAGTTCCCGGGACAGAACTTAGGATGTGTCTCCTCCAATATGT-  
3002 -----  
3001 -----  
2004 TCTGACTTAGCCAAGTTCCAGGACGGAACTTAGGATGTGTCTCCTCCAATACGT-  
2002 TCTGACTTAGCCAAGTTCTTGGGACAGAACGTAGGATGTGTCTCCTCCA-----  
2001 TCTGACTTAGCCAAGTTCCAGGACTGAACGTGGGATGTGTCTCCTCCA-----  
1011 TCTGACTTAGCCAAGTTACCAGGACAGAACTTAGGATGTGTCTCCTCC-----  
1007 TCTGACTTAGCCAAGTTCCCGGGATGGAACTTAGGATG-GTCTCCTCCA-----  
1006 TCTGACTTAGCCAAGTTCCCGGGATGGAACTTAGGATGTGTCTCCTCCA-----  
1005 -----  
1004 TCTGCCTTAGCCAAGTTCCAGGATGGAACTTAGGATGTGTCTCCTCC-----  
1001 TCTGACTTAGCCAAGTTCCCGGGACAGAACTTAGGATGTGTCTCCTCC-----
