# Supplementary material for: A Novel Coronavirus and a Broad Range of Viruses in Kenyan Cave Bats
Source: MDPI journal article supplement (doi:10.3390/v14122820), 2022-12-17
Supplement: s1 [file s1]

Supplementary Data S1: Coronavirus sequences obtained in the study. The sequences are provided as FASTA files.

>SUOHC3001-ON893136

```
GGGCACTATACAGTGTTTCGATGATGACACTGGACGTGTCCATGATGGCAGTGATTTTGCAC
CCGGAGATCTTTCCACCATGGCCGTTACTTCGCTCGTTGTGCGTAATCGTGCAATTTTGGACC
CGGTTGCTCGCGTCGAGCGTAAAGCTACTGAATTTGTGCAGACATTAGATGTAGCTTCTGAT
CAATTCCTTTGCCTTTGGTGATGTTGTGTACGGAATGTTATTACAGTGCTTTTGTGGCTTTTGA
GTATGCTTAGTATAGTTTTTAAGGCCTTTAAGAGTAAAGATTTAAAAGTTTTTGTCTTAGCCC
CTGAGAGAACTGGTGTTATACTAAGTCGTAGTTTACGCTATAATTTTAAAGCTTGTAAGCAC
GTTTTTAAGCTTAAGATGCGTTGGGTCACATTGTTTTTCAAATTTTGTCTGTGTACACAT
TGTATGCAGTAGGTTTCTTGTTTGTACGGTTTGGTCCTGTTAACGGTTATGTCTGTGGTGACT
ACGTTTTGGGTTATGCAGAATCAAACCTTCGATAAGAATTCATATTGCAATTCTCCGCTGTGT
AAAGTGTGCTTGTATGGCTACCAGGAATTGAGTGACTTTCCTCATACTAACACTGTTGGGA
GCATATTAAAGACCCACTTATTGGGAATGTTATGCCCTTGTTTTACTTAGTCTTCTAGCAAT
TTTTGGTGGTCTTCCGATGAGAATTATTGTGTGCTATTTTGTTCACAGTATGTAAACTTTTTT
GGTAGCAAATTTGGTGTTCAAGACAATGTTTGGCTTCTACAGGTCATTCCATTCTCAGTGTTT
GGTGATGAAATTGTGGTTTGTTCATTGTTTTTAAGGCACCTTGCTTTTTGCGACATGTCCTCT
TAGGCTGTGATAAAGCTTCTTGTTGCTTGTTGTAAAGTGCGCGTCTTCGTCGTGTACCTA
TGCAGACTATTGTGAATGGAGCTTCAAATCATTTTATGTTATGGCTAATGGCGGTAAGAGT
TTTTGTAAGAAGCATAACTTCTTCTGTCTTAGTTGTGACTCTTATGGTCCTGGTAATACTTTTA
TTAATGAGGTAATTGCCAAGGAAGTGCCAATGTGACTAAACTAATGTTCAACCTACCGG
TACAGCTTGTGTAGACATTGATAAGGTTGAGTTTTCTAATGGGTTTTACTATTTGTATAGTGG
TGAGACATTTTGGAAATACAATTTTGACATTACTGAAGCTAAATATAGCTGTAAAGATGTCC
TTAAGAATTGTAACATTGTGTCTGATTTTATTGTTTACAATAATGTTGGTAGTAATGTGACAC
AGGTTTCGTAATGCTTGTGTTTACTTATCTCAACTTTTGTGTAAACCTATTAACTTGTAGACT
CAGCTCTCCTTGCCACGTTGAACGTAGACTTTAATGGTGCTCTGCATGCAGCTTTTGTGGAA
GTGCTTAATGACAGTTTTTCTAAGGACTTGTGCGGTTGCACTACTATGGCTGAGTGTAAGCA
GGCACTAGGTATTGATGTTAGTGATGATGATTTTGTTAATGCTGTTAGTAACGCACACCGTT
TTAACGTGTTGCTTACAGACGTTTCATTAAACAATTTTGTACATCCTATGCCAAACCAGAG
GAGAAGTTGTCTACTCATGACCTTGCGACTTGTATGCGTGCTGGTGCTAAGGTTGTCAATCA
TAATGTTCTCGTAAAAGAGAATATGCCTGTTGTGTGGGCTGCTAGAGAATTTAACTTTTTAT
CTGAAGAATGTCGTAAGTATTTGATTAAGACGTCAAAGCTAAGGGCGTCAATTTTCATGCT
TACATTTAACGACAATAAGATGCAAACACACGTCCCCGTTGTTAGCATTATAGCTAAGCAA
GGGGCTGGTGTTTTGCCCACTTGTTACAAATTTTTGTGGTGTTGTGTTTCTTTGTTGTTGTTG
TGTTCTTTAGTACTGGTTTATTGTCTTTGAGCAACAGGTTACTAGTGAGACTGATTTTGACT
TTAAGTACATTGAGAATGGTGCTTAAAGTGTTACAGAAATCCTTGGATTGTGTGCATAAT
GTCTTTGACAATTTTGTACATGGCATGACGCAAAATTCGGTTCGGTGCCAAGGTTGATGC
CAGGTGTCCTATTGTCGTAGGTGTATCTGATGATGTGCGTATGATTCTTGGTATTGCCGCTGG
TGTTAAGCTTGTTGGTAAACATTGGTTTTTGCACCTCAATCTGTGTTTGGTGATTCTGGTTTA
TGTTATGACCTTAATGTTTTGACAACCACTGCTAGTTGTGTTTTTAATTCGGCTTGTACTATT
CTTAGTGGCGTTGGAGGTAAACACACCTATTGTTACAAGGATGGTCTTGTGTCTGATTCAAA
GTTGTATTCTGACATCTTGCCTAATAGTCATTATAAACTTGAAGATGGCAATTATATTAAAC
TGCCAGAAGTTTTGACTAGGGGTTTTGGCTTCAGAACAATTCGCACCAATTGAAACCACATAT
TGCCGTATGGGTCAGTGTATTGATTCTAGAGCTGGTGTTGTTTGGTGTTGACCGTTTCTTT
GTATACAGTGCTGAAACTGGTCCAGATTTTATCTGTGGTACAGGCCTTATTTCACTGTTGTAT
AATATCTTTAACATTTTTTCAGGTTCTTTCACTGTGATGGCTTTGTCTGGTCAAATCATTTTGA
ATTTAGTTGTAGCAACTTTAGTGGTGTTTAGCTGTTTTATGGTTACCAAATTCAAGCGTGTCT
TTGGTGACCTTTCTTTTGCAGTTTTTACAGTTTGTACAACCTTCTTGTGTGAATAGCATTCTTA
CATTATTACACAGAATTATTGTGCTATGTATGTGTATGCTTTCTTGTATTTTATGGCCACTCG
CAATATGCGTTATGCTTGGATTGGCATAGTGGCTTTGTGCTTGCCTATTTCACTGGCACC
```

ATGGTGGCTTATTGTTTGGTATGTCTGTGCTACATGTGTTGGGTTGATTCCCTAGTCTTATGAA  
ACTTAAGGTTTCTACGCAGCTTTTTGAGGGAGACAAGTTTGTCCGGCACTTTTGAGAGTGCTG  
CTGCAGGTACTTTTGTGATTGACATGCATTCTTATCAGCGTCTGGTCAATAGTATTGCACCG  
GAGAAGCTGAAACAGTATGCTGCCAGTTACAATCGTTATAAAGTACTATAGTGGTAGCGCTA  
GTGAGGCTGACTACCGTCTTGCTTGTTCGCTCACCTTGCAAAGGCTATGTTGGACTATGGT  
ACCAACCATCAAGACATGCTCTACACTCCTCCCACAGTTTCGTACAATTCTACATTGCAGTC  
TGGTCTGCGAAAGATGGCTCAACCATCTGGTGTGTTGAAAAATGTGTGGTTCCGTGTGAGTT  
ATGGTAACATGACATTGAATGGTGTGTTGGCTTGGTGACACAGTTATTTGTCCTAGACATGTT  
ATTGCGTCATCAACCACTTCTACCATTGATTATGAACATGAGGCTTCTATTATGCGTCTTCAT  
AATTTTTCTATTGCTGTTGGTAATGTCTTTTTGGGTGTTGTAGGTGTTTCTGTTAGAGGTTGTA  
ATCTTCATATTAAGGTTAACCAATCTAATGTAAACACACCCAATTATAGCTTTAAAACTTTG  
AAGGCTGGTGATTCTTCAACATTTTGGCTTGTATGATGGTGTACCTGCTGGTGTCTATGGT  
GTGACACTGCGCACAAATAACACTGTGCGTGGTTCATTTATCAATGGAGCTTGTGGTTCACC  
GGGTTACAATATTGTTGGAGGTACAGTTGAGTTTTGTTACCTTCATCAGCTTGAACCTGGCA  
GTGGTTGTCATGTTGGTCTAATCTTGAAGGTGTTATGTATGGTGGTTTTGAGGATCAACCTA  
CATTGCAAATTGAAGGCGCTAGTAATTTAGTTACTGTAAATGTTATTTTCGTTTCTTTACGGTG  
CACTTTTGAATGGTGTTACATGGTGGCTTACAAGTGAACGTGTCACCATAGACGCTTATAAT  
GAGTGGGCTCAACAAAATGGTTTTACACAGGTTAGTTCTGTGGATTGTTTTACCATTCTTGC  
AGCCAAGACTGGTGTAGACGTGCAACGTATTTTAGCGGCTGTACAGCGTTTGCACAAGGGT  
TTTGGTGGTAAGGCTATCCTTGGATTCACCTTCTTACAGATGAGTTCACTACTGCTGAGGTC  
ATACAGCAAATGTATGGTGTGAGTCTACAGAGTGGCAAGGTTTCCAGTACTTTCAAGAATTT  
GTTTCTTGTGGTACTTTCTTTGTTATGCTGTGGTCTGAGTTGATGATGTTACACCAATTTTTCT  
GGGTTAGTCCCGGATTTGTCACCTCCAATTTTGTCTATGCTCGTTTTGCTGTCAATTATGTTTAC  
AGGTTTTATTAAACATAAAGTTTTGTACCTTTATACATTTTTGATTCCAGCAGTTATTGTGAC  
GTCTTGTGCAATTTTCTTGTGAGCTTGCAATTAATTCTTGGCTTGCATCTGTTCTTGATTAT  
CACGCCTCTATTATGAGTGTGATATTCAGGGTGTGATTAATGTAGTTATTTGTGCTATTGTG  
ACTATATTGCACACGTACAGGTTTGCCAAGGCTGGTTTTGTGACTTATGTTACATATTTCTG  
TCGTTGTTTGTGGTATTTTATAATTGGTGGTTTCATGGTGATCTGCTGAGTCTGTTTATGATGT  
TGCTTCTCAATGTGTCAGATAGCTGGTATGTTGGTGTCTATTGCATACAGAATATCATTGCTTG  
CAGCCACACAATCCCTATGTTGGAACCTGTTGTTGGTAAGGCCAAGGTTGTGATTTTTATTT  
ATGTTGCAATTGGTTTTTTGTGCTGTATGTATTATGGTGTCTGTATTGGATTAACAGATTCTG  
TAAGTTGACACTTGGTGTATATGACTTTAAAGTCAGTGCTAATGAGTTAAAGTATATGGTTG  
CTAACGGGTTACGTGCTCCTAGAGGTGTGTTTGACTCAATGCTTCTGTCTATGAACTTGTTG  
GTATTGGTGGTGATAAAGTTATAAAAGTTTCCACGGTACAATCCAACTGACAGATATCAA  
GTGCACTAATGTTGTTTTGCTTGGCTGTTTGTCTAGTATGAACATTGCAGCTAATACTAAAGA  
ATGGGCTCATTGTGTCGAATTGCACAATAAGATTAATCTTTGTGATGATCCTGAAAAGGCAC  
AAGAAATGCTTCTTGCAATTGCTAGCTTTCTTTATTAGTAAGCAAAAAGATTTTGGCATTGAT  
GATTTGATTGATTACACTTTGACAGTTCTAGTGTACTGCAGAGTGTTGCGTCTACATTCGTC  
AATATGCCTTCTTACATTGCTTATGAAAGTGCGCGGCAAGTTATGAGGATGCTGTTAATAA  
TGGGTCCTCTCCACAGCTCATTAAAGCAGCTTAAGCGTGCTATGAATATTGCTAAAGCTGAGT  
TTGACCATGAGTCTTCGGTTCAAAGAAGATTAATCGCATGGCCGAACAAGCTGCTGCTCA  
GATGTTCAAGGAAGCACGTGCTGTTAATAGAAAGTCCAAGATTATTAGTGCTATGCACTCTT  
TGCTTTTTAGCATGCTTCGTCGCTTGGACATGTCTAGTGTAGACACTATTCTTAGTCTTGCAA  
AAGATGGTATAGTTCCCTCTGTGCGGTGATCCCCGCCACTTGTGCTACTAACTTTCTATTGTTA  
GCAGTGATTTTACGTCATTTGCTAAGATTGTTAAAGATGGTTGTGTGCACTATGCTGGTGTG  
GTGTGGTGCATTGCTGAAATCACTGATGCTGATGGTAAGATCGTACATCTTAAGGAGGTTGT  
CGAAGAGAACACAGATTCACCTACATGGCCACTCTTTGTTAGTTGCGTGCGTGTGTTGAAGC  
TTCAGAATAATGAGATTATCCTGGTAAGCTTAAACACCGTGTTGTAAAGGCAGAGGGTGA  
TGGTTTCAGTGTTGAAGGTAAAGCACTCTTTAATAATGAGGGTGGTAAACTTTTATGTATG  
CTTTTGTGCTGACAAACCAGATTTGAAATATGTAAAGTGGAATTTGATGGTGGTTGTAAC  
ACTATTGAACCTTGAGCCACCTTGAGGTTTGTGTTGAACTGCAAATGGCACTGTTATAAA  
GTACTTGTATTTTGTGCGTAATCTAAACACATTGCGCAGGGGTGCAGTTTTGGGCTTTATTGG

TGCTACAGTGCGTTTGCAAGCCGGTAAACAAACAGAACTTGCTTCTAATTCGGCATTGCTTA  
CTATGTGTGCTTTTGCTGTTGATCCTGCAAAGACGTATGTTGACGCTGTTAAGAAGGGTGT  
AAACCTGTCGGGAATTGCGTCAAGATGTTGTCAAATGGTTCAGGTACTGGCCAAGCTATTA  
CTGTTGGTGTGAAGCTAATTCTAATCAAGATTCTTATGGTGGCGCTTCTGTCTGTTTGTATT  
GCCGTGCACATGTTGAACATCCTACGATGGATGGTGGTGGTTCGTTACAAAGGCAAGTATGT  
CCAAGTCCCACTTGGAATGCGGATCCTATACGGTTCGTGTTAGAAAATGAGCCATGTAAA  
GTTTGTATGTGCTGGTTGAATAATGGTTGCACTTGTGATAGAACTTCTATTCAGAGTGGTAT  
ACGAGTTATTTAAACGAGCACGGGGCTCTAGTGCAGCTCGACTAGAGCCCTGTAATGGAAC  
TGACACGGATCGTGTAGTCCGTGCTTTTGACATTTACAATAAGGATGTTGCGTGTATTGGCA  
AGTTTCTTAAGGTCAATTGTGTCCGTTTTAAGAATCTTGACAAGCATGATGCCTTCTTTGTTG  
TAAAACGTTGTACGAAGTCTGTGATGGAACACGAGCAGTCCATATATGACAAGCTTCACAG  
TTGTGGTGCAGTTGCAGTTCATGATTTTTTCTTGTGGAAAGATGGCCGTTTCAGTTTTTGGTAA  
TATTAGCAGGCAAAACCTGACTAAGTATACAATGATGGACTTGTGTTATGCTTTGAGAAATT  
TTGATGAGCGTAATTGTGAAACACTTAAAGAAATTCTTGTCTTACTGGTTGTTGTGACTATT  
CATATTTTGAAAATAAGGATTGGTACGACCCAGTTGAAAATGAGGACATTCATAAAGTTTA  
TGCACACCTTGGAACCTGTTGTCTCTAATGCATTGCTTAAGTGGTAAAGCTTTGCGATGCGA  
TGGTAGAGGCAGGTGTAGTGGGTGTGTTAACACTTGATAACCAAGACCTTAATGGTGATTTT  
TATGATTTTGGTGACTTTGCTACGACAATACCTAAAATGGGCGTACCATTATGTACCTCTTA  
TTACTCTTATATGATGCCTGTAATGGGTATGACCAATTGCTTGCATCTGAGTGTTTTATTAA  
GAGTGACATTTTTTGGTAGTGATTTTAAGACCTATGATTGCTTGAGTACGACTTTACAGAGC  
ACAAAGAGGCTTTGTTTCGTAAGTACTTCAAGTATTGGGGTCAGGATTACCACCCTAATTGT  
GCTGATTGTCACGACGAGCTTTGTATTGTTCAATTGTGCGAATTTAATACGTTGTTGCCCACG  
ACTATTCCTAATACAGCTTTTGGTCTCTGTGTGCGAAAGTGTGTTGTTGATGGTGTGCCACTT  
GTTACTACAGCTGGCTACCATTTCAAGCAGTTGGGCTTGTGTTGGAATAAGGATATAAATAC  
TCACTCTACTCGTTTGAGTGTAATGAGTTGTTACAGTTTGTACAGACCCTGCACCTTTGAT  
AGCATCATCACCAGCCCTTGTGGATCAGCGTACTGTTTGTGTTTTCAGTCGCTGCCTTGAGTAC  
TGGTATGACAAATCAGACAGTTAAGCCAGGCCACTTTAATAAAGAGTTCTACGACTTTTTG  
AGATCGCAAGGATTTTTTGAAGAAGGCTCTGAATTAACCTTAAAGCATTCTTCTTTGCACA  
GAAGGGTGATGCTGCTGTCAAAGATTTTGACTACTATCGTTATAATAGACCAACTATGCTAG  
ACATTTGTGAGGCTAGAGTCACTTATAAAATAGTGCAGCGTTATTTGAGTGCTATGAGGGT  
GGCTGTATTGCCGCTAAGGATGTTGTTGTTACTAACCTCAATAAAAGTGCAGGTTACCCACT  
TAATAAATTTGGTAAAGCTGGTTTGTATTATGAGTCTCTTAGTTATGAGGAACAAGATGCAC  
TATACGCTCTTACAAAGCGTAATGTGTTACCTACTATGACACAGCTTAACCTTAAATATGCA  
ATCAGTGGTAAAGAACGTGCTAGGACTGTTGGTGGTGTTCATTGTTGTCTACTATGACTAC  
TAGACAGTTTCATCAGAAACACCTTAAGTCCATTGTTAATAACAGTAATGCATCTGTTGTCA  
TTGGTACCACAAAATTTTATGGTGGTTGGGACAACATGCTTAAGAACCCTATTGATGGTGT  
GACAATGCGTGCCTTATGGGTTGGGATTACCCTAAGTGTGATCGTGCCTCCCTAATATGAT  
TCGCATGATTTCTGCCATGATTTTGGGTTCGAAGCATGTTACTTGCTGTGATTCTTCTGATAA  
ATATTACCGTCTCTGTAATGAGCTCGCTCAAGTGTGACAGAAGTTGTATATTCTAATGGTG  
GGTTTATCTCAAGCCTGGTGGTACCCTTCTGGCGATGCTACAACGGCTTATGCGAACTCT  
GTGTTAATATTTTTCAAGCTGTTAGCGCCAATATTAACAGGTTGCTTAGCATTGATAGCAA  
TGTGTGTAATAATATTGGTGTAAAGAGTTTGCAGCGTAAGCTATATGATTGTTGTACAGAT  
CTTCTTCAGTAGATGATTCTTTGTAGACAGTTATTATTGCTACTTGCGGAAACATTTTTCTAT  
GATGATTTTGTGAGATGACGGTGTGTTGTGTTATAATAAAGATTATGCTGATTTGGGTATGT  
GGCAGATATTAATGCCTTTAAAGCTACCCTATACTATCAGAATAATGTCTTTATGAGTACTG  
CTAAATGCTGGGTGGAGCCAGACATTAGCAAAGGTCCTCATGAGTTCTGTTACAGCATAC  
TATGCAGATTGTAGATTCTGACGGCAAGTATTATTTGCCATACCCAGACCCGTCTAGAATAT  
TGTCTGCTGGTGTATTTGTGATGATGTTGTTAAGACTGACGCTGTGATATTGTTGGAGCGCT  
ACGTCTCATTGGCAATCGACGCATATCCTTTGTCTAAACATCATAATCCTGAATATAGAAAA  
GTGTTTTATACACTTCTAGATTGGGTAAAGCATCTACACAACACACTTAATCAGGGCGTGCT  
TGAGTCTTTCTCCGTTACATTGCTTGAGGATGTATCCTCTAAGTTTTGGGATGAGAGTTTTTA  
TGCTAGTTTGTATGAAAAGTCTACAGCACTTCAAGCCGCAGGCCTATGTGTTGTTTGTGGTT

CTCAAACCTGTACTGCGTTGTGGTGATTGTCTTAGACGACCTATGTTGTGCACTAAGTGTGCTT  
ACGACCATGTTGTCAACACGAATCATAAATTCATTCTGGCTATAACACCTTACGTTTGTAAAT  
GCTTCTGGTTGCACCGTTAATGATGTGACTAAGTTGATTTAGGAGGTCTGAGTTACTGGTGT  
ATAGACCATAAACCTACACTGTCACTACCACTTTGTAGTGCAGGTAATGTTTTTGGTTTGTAA  
TAAAAACTCTGCTACAGGTTCAACCGGATGTAGAGGTTTTTAATACACTTGCCACGTCAGATT  
GGACTGACGTTAAAGATTACAAGCTGGCTAATGAATGCAAGGATTCTCTTAGGCTTTTTGCG  
GCTGAGACTGTTAAAGCCAAAGAAGAGAGTGTTAAATCCTCTTATGCTTGTGCTACACTTA  
AAGAAGTTGTTGGGCCACGTGAGTTGATTCTTAGTTGGGAGTGCGGAAAAATTAAACCGCC  
ACTTAACCGTAATTCAGTGTTTACGTGTTTCCAGATTTCTAAAGACTCTAAGTTCCAGGTTGG  
AGAGTTTACGTTTGAAAAATTGGATTACGGTTCTGATGCTGTGTGTTACAAGTCTACCACCA  
CAGTTAAATTAGTGCCTGGTATGATTTTTGTTCTCACATCACACAATGTACAGCCGCTTAGG  
GCTCCCACTATTGCTAATCAAGAACGCTATGCTTCAATTTATAAACTGCACCCTACTTTTAA  
TATTAGTGATGCTTATGCCAATTTGGTGCCGTATTACCAAATGATTGGCAGACAACGAATCA  
CAACTATTCAAGGCCACCGGGAAGTGGCAAGTCCCATTTGTGTTATAGGTCTGGGTCTTTAT  
TACCCAGGTGCTAGGATGGTCTTTGCGGCTTGCTCTCATGCAGCCGTAGATTCACTTTGTGTC  
AAGGCTGCCACTGCTTATAGTGTAGACAAATGCACTCGTATTATCCCTGCCCCGTGCTAGGGT  
TGAGTGTTATAGTGGGTTTAAAGGTAAATAACACTCAGGCACAGTACATCTTTTCAACAGTCA  
ACGCACTCCCTGAGTGTAATGTTGACATAGTTGTTATAGATGAAGTGTCTATGTGTAATAAT  
TATGACCTGTCCGTTATTAACCAGCGGTTGTCTTATAAACATATTGTTTATGTGGGTGACCCA  
CAGCAATTACCAGCGCCACGTACCATGATCACTAAAGGCGTTCTCGAACCTAAGGACTATA  
ATGTTGTAACCTCAGAGGATGTGTGCTGTTGGGCCAGATGTCTTCTTGCATAAAATGTTACAGA  
TGTCCTGCTGAGATTGTTAAACAGTCTCAGAGTTGGTTTATGAGAATAAGTTTGTACCTGT  
TCATGCTGATAGCAAACAGTGTTTTAACTGTTTTGTAAGGGTAATGTTTCAAGGTTGACAATG  
GTTCTAGTATTAACAGAAAGCAATTGGATATCGTCAAGATGTTCTTGCTAAGAATCCACGT  
TGGTCTAAAGCTGTGTTTATCTCACCTTATAATAGTCAGAATTATGTGGCTAGTAGGGTTTTG  
GGTTTGCAGATTCACTGTTGATTCTCTCAAGGTAGTGAATATGACTATGTCATATACAC  
ACAGACGTCAGACACAGCACATGCTTGCAATGTTAATAGATTTAATGTTGCAATTACAAGA  
GCCAAGAAGGGTATTCTTTGTGTTATGTGTGATCGGGAGTTGTTTGTGCTCTGAAATTTTTTC  
GAGATCAAGCTTTCTGACTTGCAGGCTAGTGGTGATGGCTGTGGTCTTTTTAAAGATTGTTA  
CAGGAAAGATGATGAATTACCTCCATCTCATGCAGCTACCTATATGGCCTTGTCTGACAACCT  
TTAAGGTCAATGGTGATCTTGCTGTGCAGATTGGCTTTAAAGGTGTGTGTAAGTATGAGCAT  
GTTATTTCTTTTATGGGCTTCAGGTTTGATATTAATGTGCCTGAACAGCATAGTCTTTTCTGTA  
CCAGGAATTTTGAATGCGCCACGTGCGTGGTTGGCTTGGTATGGATGTAGAAGGTGCCCCA  
CGTTACAGGTGAAAATGTAGGTACTAATGTACCATTACAAGTAGGCTTCTCTAATGGTGTGTG  
ATTTTGTGTGTTCAACCGGAAGGTTGTGTTGTCACTGAGACAGGCAGCAGGATCGTACCTGTT  
AGAGCTCGTGCTCCGCCAGGTGAACAGTTACACATTTGGTCCCCCTGCTTCGTAAGGGAC  
AACCATGGGCTGTGGTTCGTAAACGCATTGTTTCAAGATGTGTTGCGATTACTTGGTGAACCTA  
TCAGACATATTAATCTTTGTTTTGTGGGCTGGTGGTTTGGAGTTGACTACCATGAGATATTTT  
GTTAAATTTGGACCAAGCAAAGTTTGTGAGTGCGGCAAGGTGGCCACTTGTTACAATAGTG  
TGACTCATGCATACTATTGTTTCAAGCATGCCTTAGGGTGTGATTATTTGTACAATCCCTATG  
TTATTGACATTCAGCAGTGGGATTATACGGGTTCACTTAGCCATAATCATCATGAGCATTGT  
AATGTACATCGCAATGAGCATGTTGCATCTGGTGATGCTATTATGACTCGTTGTCTTGCTGTG  
TATGATTGCTTTGTCAAGAACGTTGATTGGTCCATTACTTACCCATTCAATTGCTAATGAACAT  
GCCATTAATAAGAGTGGTAGAGTTGTGCAATCTATGGTTGTCAAAACAGCTATAAAGTTAT  
ATAATCCTAAAGTAATTCATGATATTGGTAATCCTAAAGGTATTAGGTGTGCAGTTACTGAT  
GCACACTGGTTTTGCTATGATAAGCAGCCCCTCAATTCCAATGTCAAGTTGCTTGAGTATGA  
TTATATAACTCATGGTCAAATGGATGGGTATGCCTATTTTGGAAATTGCAATGTTGACATGT  
ATCCTGAATTTCTATTGTGTGCCGTTTTGACACTCGTTGTAGGTCAAATCTCAACTTAGAAG  
GTGTTAACGGAGGTTCACTTTATGTCAACAATCATGCATTTTTTACACCTGCATTTGATAAG  
CGTGCAATGGCTAACTTAAGCCTATGCCCTTCTTTTTCTATGATGACACGCCTTGTGATCGT  
GTTTATGATCAGATAAATTATGTACCACTGCGTGCTAGTACTTGTATTACAAAGTGTAATAT  
TGGTGGTGCTGTTTGCAGTAAGCATGCCAATATGTTTCATGCCTATGTTAACGCATATAATA

CTTTCACGCAGGCTGGTTTTACTATTTGGGTTCTGTAACTTTTGATTTGTTTAACTTTGGCA  
AACATTTGTGCGAACTAACTTGCAAGGCTTGGAGAACATAGCGTTTAATGTCCTCAAGAAA  
GGGTCTTTTGTTGGTGTAGAGGGTGAACCTACCGTTGCTATCGTTAATGACCGTGTGCTGGT  
ACGTGATGGCACCGTGGATAAATTTGATTTTTACTAATAAAACCTCATTACCTACTAATGTTG  
CTTTCGAGCTTTACGCCAAACGTAAAATGGGTTTGACACCACCTCTTGCTGTTCTCAGGAAT  
CTTGGTGTGTTAGTACCTATAAGTTTGTGTTATGGGATTATGAGGCAGAAAGACCATTTAC  
TACTTTTACTAAAAATGTTTGCAGTTACACTGATTTTGATGAGGATGTGTGCACTTGCTTTGA  
TAATAGCATTACAGGGTTCGTTTGAACGCTTTTCAATGGCTAACAAATGCAGTGCTTATTTCCA  
CATCTGCTGTAAAGAAGCTTACTTGTATTAAGCTTAACTATGGTTTGCTTAATGGTGTGGCTG  
TTTCTAAGACTGGTGACAAGCCTGTTACATGGTATATCTATGTCCGTAAAAATGGTCAATTT  
GTTGACCAATTTGACGGCTATTTTACTCAGGGGCGTACTACTATTGATTTCTTACCTCGTAGT  
GTTATGGAGGAAGACTTTTTAAACCTTGATATGGGTTTGTATTATTAGTAAGTACGGTCTTGA  
GGACTATGCTTTTGAGCATGTCGTGTATGGTGACGTGTCTGGTACTACACTTGGTGGATTAC  
ATTTATTAATTTCTCAAGTACGCCTTGGA AAAATGGGTGTCTTGAAAGTGGATGAGTTCACA  
CATAGTGAGGATAGTACATTGAAGTCCTGTACAGTCACCTATTCTAATGATCCTAGTAGTAA  
AATGGTTTGTACCTATATGGATTTGTTGCTAGATGATTTTGTTACCATTTTAAAATCTTTGGA  
TTTGGGTGTAATTTCTAGAGTTCATGAAGTTGTAGTCGATTGTAAGGTTTGGCGTTGGATGTT  
GTGGTGTAAAGGACCACAAAGTTCAAACGTTCTACCCACAGTTGCAGTCGTCAGAATGGAAA  
TGTGGTTATTCCATGCCCTCACTGTATAAAATACAGCGTATGTGTCTTGAGCCCTGTAATTTG  
TACAATTATGGTGCTAGTCTTAAGCTACCTGAAGGTATCATGTTTAAACGTGGTCAAATACAC  
TCAGTTATGTCAATATTTGAATAGTACTACTATGTGTGTACCGCATAATATGCGTGTACTAC  
ATCTTGGTGCTGGCTCAGATAAAGGAGTCGCACCTGGTACTGCTGTATTGCGTCGTTGGTTA  
CCCAGTGATGCTATTATTGTTGACAATGATGTTAATGACTATGTTAGTGATGCAGATTTTCA  
TGTAACAGGGGATTGCGCCACTTTGTACTTACAGGATAAGTTTCGACTTAGTGGTTTCAGACA  
TGTATGATGGCCGTATTAACAGTGTGATGGTGTAAACGTTTCAAAGGATGGCTTCTTTCTT  
ACATCAATGGTGTGATATCAGAGAAGCTTTCCCTAGGTGGTACAGTTGCCATTAAGATTACT  
GAGTATAGCTGGAATAAGCGGCTGTATGAGTTGATACAAAAGTTTGAATTTTGGACGTTGTT  
TTGTACTAGTGTGAATACATCATCGTCTGAAGCTTTTTCTAATTGGTGTAACTATCTTGGCGA  
CTACGCTACTCAACCCATTATGGATGGTAATACTATGCACGCTAATTATGTGTTTTGGCGTA  
ATTCTACAATTATGTCCATGTCATATAATAGTGTGCTTGATCTAGCAAAGTTTAAATTGTAGA  
CATAAAGCTACGGTTGTTATTTCACTTAAAGAAAGTGATTTGAATGATGTTGTGGTAGGCCT  
TATAAAGAATGGAAAGTTGTTGGTTAGAAAGAGTGGTGTCAATTTGTGACTATGGTAACCAT  
TTAGTTTCAACTAAATAA

>SUOHC3002

AGTGTGATACGAGTTATTTAAACGAGCACGGGGCTCTAGTGCAGCTCGACTAGAGCCCTG  
TAATGGAAGTACACGGATCGTGTAGTCCGTGCTTTTGACATTTACAATAAGGATGTTGCGT  
GTATTGGCAAGTTTCTTAAGGTCAATTGTGTCCGTTTTAAGAATCTTGACAAGCATGATGCC  
TTCTTTGTTGTAAAACGTTGTACGAAGTCTGTCATGGAACACGAGCAGTCCATATATGACAA  
GCTTCACAGTTGTGGTGCAGTTGCAGTTCATGATTTTTTCTTGTGGAAAGATGGCCGTTCACT  
TTTTGGTAATATTAGCAGGCAAAACCTGACTAAGTATACAATGATGGACTTGTGTTATGCTT  
TGAGAAATTTTGATGAGCGTAATTGTGAAACACTTAAAGAAATTCTTGTCTTACTGGTTGC  
TGTGACTATTCATATTTGAAAATAAGGATTGGTACGACCCAGTTGAAAATGAGGACATTC  
ATAAAGTTTATGCACACCTTGGAACCTGTTGTCTCTAATGCATTGCTTAAAGTGCCTTAAAGCTT  
GCGATGCGATGGTAGAGGCAGGTGTAGTGGGTGTGTTAAACACTTGATAACCAAGACCTTAA  
TGGTGATTTTTATGATTTTGGTGACTTTGCTACAACAATACCTAAAATGGGTGTACCATTATG  
TACCTCTTATTACTCTTATATGATGCCTGTAATGGGTATGACCAATTGTCTTGATCTGAGTG  
TTTTATTAAGAGTGACATTTTTTGGTAGTGATTTTAAAGACCTATGATTTGCTTGAGTACGACTT  
TACAGAGCACAAAGAGGCTTTGTTTCGTAAGTACTTCAAGTATTGGGGTCAGGATTACCAC  
CCTAATTGTGCTGATTGTACGACGAGCTTTGTATTGTTCAATTGTGCGAATTTTAAATACGTTG  
TTCGCTACGACTATTCCTAATACGGCTTTTGGTCTCTGTGTGCGCAAAGTGTGTTGATGGT  
GTGCCACTTGTTACTACAGCTGGCTACCATTTCAGCAGTTGGGCCTTGTGTTGAATAAGGA  
TATAAATACTCACTCTACTCGTTTGAGTGTAATGAGTTGTTACAGTTTGTACAGACCCTG

CACTTTTGATAGCATCATCACCAGCCCTTGTGGATCAGCGTACTGTTTGTTCAGTCGCTG  
 CCTTGAGTACTGGTATGACAAATCAGACAGTTAAGCCAGGCCACTTTAATAAAGAGTTCTA  
 CGACTTTTTGAGATCGCAAGGATTTTTTGAAGAAGGCTCTGAATTAACTTAAAGCATTCT  
 TCTTTGCACAGAAGGGTGATGCTGCTGTCAAAGATTTTGACTACTATCGTTATAATAGACCA  
 ACTATGCTAGACATTTGTGAGGCTAGAGTCACTTATAAAATAGTGCAGCGTTATTTGAGTG  
 CTATGAGGGTGGCTGTATTGCCGCTAAGGATGTTGTTGTTACTAACCTCAATAAAAGTGCAG  
 GTTACCCACTTAATAAATTTGGTAAAGCTGGTTTGTATTATGAGTCTCTTAGTTATGAGGAA  
 CAAGATGCACTATACGCTCTTACAAAGCGTAATGTGTTACCTACTATGACACAGCTTAACCT  
 TAAATATGCAATCAGTGGTAAAGAACGTGCTAGGACTGTTGGTGGTGTTCATTGTTGTCTA  
 CTATGACTACTAGACAGTTTCATCAGAAACACCTTAAGTCCATTGTTAATACACGTAATGCA  
 TCTGTTGTCAATTGGTACCACAAAATTTTATGGTGGTTGGGACAACATGCTTAAGAACCTTAT  
 TGATGGTGTGACAATGCGTGCCTTATGGGTGGGATTACCCTAAGTGTGATCGTGCACCTC  
 CTAATATGATTTCGCATGATTTCTGCCATGATTTTGGGTTCGAAGCATGTTACTTGCTGTGATT  
 CTTCTGATAAATATTACCGTCTCTGTAATGAGCTCGCTCAAGTGTGACAGAAGTTGTATAT  
 TCTAATGGTGGGTTTTATCTCAAGCCTGGTGGTACCCTTCTGGCGATGCTACAACGGCTTA  
 TGCGAACTCTGTGTTAATATTTTTCAAGCTGTTAGCGCCAATATTAACAGGTTGCTTAGCAT  
 TGATAGCAATGTGTGTAATAATATTGGTGTAAAGAGTTTGCAGCGTAAGCTATATGATTGTT  
 GTTATAGATCTTCTTCAGTAGATGATTCTTTTGTAGACAGTTATTATTGCTACTTGCGGAAAC  
 ATTTTTCTATGATGATTTTGTGAGATGACGGTGTGTGTGTTATAATAAAGATTATGCTGATT  
 TGGGTATGTGGCAGATATTAATGCCTTTAAAGCTACCCTATATTATCAGAATAATGTCTTT  
 ATGAGTACTGCTAAATGCTGGGTGGAGCCAGACATTAGCAAAGGTCCTCATGAGTTCTGTT  
 CACAGCATACTATGCAGATTGTAGATTCTGACGGCAAGTATTATTTGCCATACCCAGACCC  
 ATCTAGAATATTGTCTGCTGGTGTATTTGTGATGATGTTGTTAAGACTGACGCTGTGATATT  
 GTTGGAGCGCTACGTCTCATTGGCAATCGACGCATATCCTTTGTCTAAACATCATAATCCTG  
 AATATAGAAAAGTGTTTATACGCTTCTAGATTGGGTAAAGCATCTACACAACACACTTAAT  
 CAGGGCGTGCTTGAGTCTTCTCCGTTACATTGCTTGAGGATGTATCCTCTAAGTTTTGGGAT  
 GAGAGTTTTTATGCTAGTTTGTATGAAAAGTCTACAGCACTTCAAGCCGAGGCCTATGTGT  
 TGTTTGTGGTTCTCAAAGTGTACTGCGTTGTGGTGATTGTCTTAGACGACCTATGTTGTGCAC  
 TAAGTGTGCGTATGACCATGTTGTCACCACGAATCATAAATTCATTCTGGCTATAACACCTT  
 ACGTTTGTAAATGCTTCTGGTTGCACCGTTAATGATGTGACTAAGTTGTATTTAGGAGGTCTG  
 AGTTACTGGTGTATAGACCATAAACCTACGCTGTCACTGCCACTTTGTAGTGCAGGTAATGT  
 TTTTGGTTTGTATAAAAACCTCTGCTACTGGTTCACCGGATGTAGAGGTTTTAATACACTTGC  
 CACGTCAGATTGGACTGACGTTAAAGATTACAAGCTGGCTAATGAATGCAAGGATTCTCTT  
 AGGCTTTTTGCGGCTGAGACTGTTAAAGCCAAAGAAGAGAGTGTTAAATCCTCTTATGCTTG  
 TGCTACACTTAAAGAAGTTGTTGGGCCACGTGAGTTGATTCTTAGCTGGGAGTGCGGAAAA  
 ATTAAACCGCCACTTAACCGTAATTCAGTGTTTACGTGTTTCCAGATTCTAAAGACTCTAA  
 GTTCCAGGTTGGAGAGTTTACGTTTGAAAAATTGGATTACGGTTCTGATGCTGTGTGCTACA  
 AGTCTACCACCACAGTCAAATTAGTGCCTGGTATGATTTTTGTTCTCACATCACACAATGTA  
 CAGCCGCTTAGGGCTCCCACTATTGCTAATCAAGAACGCTATGCTTCAATTTATAAACTGCA  
 CCTACTTTTAATATTAGTGATGCTTATGCCAATTTGGTGCCGTAAGTACCAATGATTGGCA  
 GACAACGAATCACTACTATTCAAGGCCACCGGGAAGTGGCAAGTCTCATTGTGTTATAGG  
 TCTGGGTCTTTATTACCCAGGTGCTAGGATGGTTTTTGGGCTTGCTCTCATGCAGCCGTAGA  
 TTCACTTTGTGTCAAGGCTGCCACTGCTTATAGTGTAGACAAATGCACTCGTATTATCCCTG  
 CCCGTGCTAGGGTTGAGTGTTATAGTGGGTTTAAAGTAAATAAACTCAGGCACAGTACAT  
 CTTTTCAACAGTCAACGCACTCCCTGAGTGTAATGTTGACATAGTTGTTATAGATGAAGTGT  
 CTATGTGTACTAATTATGACCTGTCCGTTATTAATCAGCGGTTGTCTTATAAACATATTGTTT  
 ATGTGGGTGACCCACAGCAATTACCAGCGCCACGTACCATGATCACTAAAGGCGTTCTCGA  
 ACCTAAGGACTATAATGTTGTAACCTCAGAGGATGTGTGCTGTTGGGCCAGATGCTTCTTGC  
 ATAAATGTTACAGATGTCCTGCGGAGATTGTTAAAACAGTCTCAGAGTTGGTTTATGAGAA  
 TAAGTTTGTACCTGTTTCATGCTGATAGCAAACAGTGCTTTAAACTGTTTTGTAAGGGTAATG  
 TTCAGGTTGACAATGGTTCTAGTATTAACAGAAAGCAATTGGATATCGTTAAGATGTTCTT  
 GCTAAGAATCCACGTTGGTCTAAAGCTGTGTTTATCTCACCTTATAAATAGTCAAAATTATGT

GGCTAGTAGGGTTTTGGGTTTGCAGATTCAGACTGTTGATTCCTCTCAAGGTAGTGAATATG  
ACTATGTCATATACACACAGACGTCAGACACAGCACATGCTTGCAATGTTAATAGATTTAA  
TGTTGCAATTACAAGAGCCAAGAAGGGTATTCTTTGTGTTATGTGTGATCGGGATTTGTTTG  
ATGCTCTGAAATTTTTTCGAGATCAAGCTTTCTGACTTGCAGGCTAGTGGTGATGGCTGTGGT  
CTTTTTAAAGATTGTTACAGGAAAGATGATGAATTACCTCCATCTCATGCAGCTACCTATAT  
GGCCTTGTCTGACAACCTTTAAGGTCAATGGTGATCTTGCTGTGCAGATTGGCTTTAAAGGTG  
TGTGTAAGTATGAGCATGTTATTTCTTTTATGGGCTTCAGGTTTGACATTAATGTGCCTGAAC  
AGCATAGTCTTTTCTGTACCAGGAATTTGCAATGCGCCATGTGCGTGGTTGGCTTGGTATG  
GATGTAGAAGGTGCCCATGTTACAGGTGAAAATGTAGGTACTAATGTACCATTACAAGTAG  
GCTTCTCTAATGGTGTGATTTTGTGTCCAACCAGAAGGTTGTGTTGTCACTGAGACAGGC  
AGCAGGATCGTACCTGTTAGAGCTCGTGCTCCGCCAGGTGAACAGTTCACACATTTGGTCC  
CCCTGCTTCGTAAGGGACAACCATGGGCTGTGGTTCGTAAACGCATTGTTTCAAGATGTGTTGC  
GATTACTTGGTGAACCTATCAGACATATTAATCTTTGTTTTGTGGGCTGGTGGTTTGGAGTTG  
ACTACCATGAGATATTTTGTAAAATTGGACCAATCAAAGTTTGTGAGTGCGGCAAAGTGG  
CCACTTGTTACAATAGTGTGACTCATGCATACTATTGTTTCAAGCATGCCTTAGGGTGTGATT  
ATTTGTACAATCCTTATGTTATTGACATTCAGCAGTGGGATTATACAGGTTCACTTAGCCAT  
AATCATCATGAGCATTGTAATGTACATCGCAATGAGCATGTTGCATCAGGTGATGCTATTAT  
GACTCGTTGTCTTGCTGTGTATGATTGCTTCGTCAAGAACGTTGATTGGTCCATTACTTACCC  
ATTCATTGCTAATGAACATGCCATTAATAAGAGTGGTAGAGTTGTGCAATCTATGGTTGTCA  
AATCAGCTATAAAGTTATATAATCCTAAAGTAATTCATGATATTGGTAATCCTAAAGGTATT  
AGGTGTGCAGTTACTGATGCACACTGGTTTTGCTATGATAAGCAGCCCCTCAATTCCAATGT  
CAAGTTGCTTGAGTATGATTATATAACTCATGGTCAGATGGATGGGTTATGCCTATTTTGG  
ATTGCAATGTTGACATGTATCCTGAATTTTCTATTGTGTGCCGTTTTGACACTCGTTGTAGGT  
CAAATCTCAACTTAGAAGGTGTTAATGGAGGTTCACTTTATGTCAACAACCATGCATTTTTT  
ACACCTGCATTTGATAAGCGTGCAATGGCTAAACTTAAGCCTATGCCCTTCTTTTTCTATGAT  
GACACGCCTTGCGATCGTGTTTCATGATCAAATAAATTATGTACCACTGCGTGCTAGTACTTG  
TATTACAAAGTGTAATATTGGTGGTGCTGTTTGCAGTAAGCATGCCAATATGTTTCATGCCT  
ATGTTAATGCATATAATACTTTCACGCAGGCTGGTTTTACTATTGGGTTTCTGTAACTTTTG  
ATTTGTTCAACCTTTGGCAAACATTTGTCGAACTAATTTGCAAGGCTTGGAGAACATAGCG  
TTTAATGTCTCAAGAAAGGGTCTTTTGTGGTGTAGAGGGTGAACCTACCGGTTGCTATCGT  
TAATGACCGTGTGCTGGTACGTGATGGCACCGTGGATAATTTGATTTTTACTAATAAAACCT  
CATTACCTACTAATGTTGCTTTTGGAGCTTTACGCCAAACGTAAAATGGGTTTGACACCACCT  
CTTGCTGTTCTCAGGAATCTCGGTGTTGTTAGTACCTATAAGTTTGTGTTATGGGATTATGAG  
GCAGAAAGACCATTTACTACTTTTACTAAAAATGTTTGCAGTTACACAGACTTTGATGAGG  
ATGTGTGCACTTGCTTTGATAATAGCATTACAGGTTTCGTTTGAACGCTTTTCAATGGCAAAC  
AATGCAGTGCTTATTCCACATCTGCTGTTAAGAAGCTTACTTGTATTAAGCTTAACTATGGT  
TTGCTTAATGGTGTGGCTGTTTCTAAGACTGGTGACAAGCCTGTTACATGGTATATCTATGTC  
CGTAAAAATGGTCAATTTGTTGACCAATTTGACGGATATTTTACTCAGGGGCGTACTACTAT  
TGATTTCTTACCTCGTAGTGTTATGGAGGAAGACTTTTTAAACCTTGATATGGGTTTGTAT  
TAGTAAGTATGGTCTTGAAGACTATGCTTTTGGAGCATGTTGTGTATGGTGACGTGTCTGGTA  
CTACACTTGGTGGACTACATTTATTAATTTCTCAAGTACGCCTTGGAAAAATGGGTGTCTTG  
AAAGTGGATGAGTTCACACATAGTGAGGATAGTACATTGAAGTCCTGTACAGTCACCTATT  
CTAATGATCCTAGTAGTAAAATGGTTTGTACCTATATGGATTTGTTGCTAGATGATTTTGTTA  
CCATTTTAAAATCTTTGGATTTGGGTGTAATTTCCAGAGTTCATGAAGTTGTAGTCGATTGTA  
AGGTTTGGCGTTGGATGTTGTGGTGTAAAGACCACAAAGTTCAAACGTTCTACCCACAGTT  
GCAGTCGTCAGAATGGAAATGTGGCTATTCCATGCCCTCACTGTATAAAATACAGCGTATG  
TGTCTTGAGCCCTGTAATTTGTACAATTATGGTGCTAGTCTTAAGCTACCTGAAGGTATCAT  
GTTTAACGTGGTCAAATACACTCAGTTATGTCAATATTTGAATAGTACTACTATGTGTGTAC  
CGCATAATATGCGTGTACTACATCTTGGTGCTGGCTCAGATAAAGGAGTCGCACCTGGTAC  
TGCTGTATTGCGTCGTTGGTTACCCAGTGATGCTATTATTGTTGACAATGATGTTAATGACTA  
TGTTAGTGATGCAGATTTCAGTGTAACAGGGGATTGCGCCACTTTGTACTTACAGGATAAGT  
TCGACTTAGTGGTTTCAGACATGTATGATGGCCGTATTAAACAGTGTGATGGTGTAAACGTT

TCAAAGGATGGCTTCTTTCTTACATCAATGGTGTGATATCAGAGAAGCTTTCCCTAGGTGG  
TACAGTTGCCATTAAGATTACTGAGTATAGCTGGAATAAGCGGCTGTATGAGTTGATACAA  
AAGTTTGAATTTTGGACGTTGTTTTGTACTAGTGTGAATACATCATCGTCTGAAGCTTTTCTA  
ATTGGTGTCAACTATCTTGGCGACTACGCCACTCAACTCATTGTGGATGGTAATACTATGCA  
CGCTAATTATGTGTTTTGGCGTAATTCTACAATTATGTCCATGTCATATAAATAGTGTGCTTGA  
TCTAGCAAAGTTTAATTGTAGACATAAAGCTACGGTTGTTATTTCACTTAAAGAAAAGTGATT  
TGAATGATGTTGTGGTAGGCCTTATAAAGAATGGAAAAGTTGTTGGTTAGAAAAGAGTGGTGT  
CATTTGTGACTATGGTAACCATTTAGTTTCAACTAAATAA

>SUOHC3004

GTGACCTTTCTTTTGCAGTTTTTCACAGTTTGTACAACCTTCTTGTGTGAATAGCATTTCCTTACAT  
CATTACACAGAATTATTGTGCTATGTATGTATATGCTTTCTTGTATTTTATGGCCACTCGCAA  
TATGCGTTATGCTTGGATTTGGCATAAGTGGCTTTGTGCTTGCCTATTTACACTGGCACCATG  
GTGGCTTATTGTTTGGTATGTCTGTGCTACATGTGTTGGGTTGATTCCTAGTCTTATGAAACTT  
AAGGTTTCTACGCAGCTTTTTGAGGGAGACAAGTTTGTTCGGCACTTTTGAAGTGTCTGCTGC  
AGGTACTTTTGTGATTGACATGCATTCTTATCAGCGTCTGGTCAATAGTATTGCACCGGAGA  
AGCTGAAACAGTATGCTGCCAGTTACAATCGTTATAAGTACTATAGTGGTAGTGCTAGTGA  
GGCTGACTACCGTCTTGCTTGTTCGCTCACCTTGCAAAGGCTATGTTGGACTATGGTACCA  
ACCATCAAGACATGCTCTACACTCCTCCACAGTTTCGTACAATTCTACATTGCAGTCTGGT  
CTGCGAAAGATGGCTCAACCATCTGGTGTTGTTGAAAAATGTGTGGTTCGTGTGAGTTATGG  
TAACATGACATTGAATGGTGTGGCTTGGTGACACAGTTATTTGTCCTAGACATGTTATTGC  
GTCATCAACCACTTCTACCATTGATTATGAACATGAGGCTTCTATTATGCGTCTTCATAATTT  
TTCTATTGCTGTTGGTAATGTCTTTTTGGGTGTTGTAGGTGTTTCTGTTAGAGGTTGTAATCTT  
CATATTAAGGTTAACCAATCTAATGTTAACACACCCCAATTATAGCTTTAAAACCTTTGAAGGC  
TGGTGATTCTTTCAACATTTTGGCTTGTATGATGGTGTACCTGCTGGTGTATGGTGTGAC  
ACTGCGCACAAATAACACTGTGCGTGGTTCATTATCAATGGAGCTTGTGGTTCACCGGGTT  
ACAATATTGTTGGAGGTATAGTTGAGTTTTGTACCTTCATCAGCTTGAACCTGGCAGTGGTT  
GTCATGTTGGTTCTAATCTTGAAGGTGTTATGTATGGTGGTTTTGAGGATCAACCTACATTGC  
AAATTGAAGGCGCTAGTAATTTAGTTACTGTAAATGTTATTTCTTTTACGGTGCACCTTT  
TGAATGGTGTACATGGTGGCTTACAAGTGAACGTGTCACCATAGATGCTTATAATGAGTG  
GGCTCAACAAAATGGTTTTACACAGGTTAGTTCTGTGGATTGTTTTACCATTCTTGCAGCCA  
AGACTGGTGTAGACGTACAACGTATTTTAGCGGCTGTACAGCGTTTGCACAAGGGTTTTGGT  
GGTAAGGCTATCCTTGGATTCACTTCTCTTACAGATGAGTTCACCACTGCTGAGGTCATACA  
GCAAATGTATGGTGTGAGTCTACAGAGTGGCAAGGTTTCCAGTACTTTCAAGAATTTGTTTC  
TTGTTGGTACTTTCTTTGTTATGCTGTGGTCTGAGTTGATGATGTTACACCATTTTTCTGGGT  
TAGTCCCGGATTTGTCACTCCAATTTTTGCTATGCTCGTTTTGCTGTCAATTATGTTTACAGGT  
TTTATTAACATAAAGTTTTGTACCTTTATACATTTTTGATTCCAGCAGTTATTGTGACGTCTT  
GTTGCAATTTTCTTGTGAGCTTGCAATTAATTCTTGGCTTGCATCTGTTCTTGATTATCATGC  
CTCTATTATGAGTGTTGATATTCAGGGTGTGATTAATGTAGTTATTTGTGCTATTGTGACTAT  
ATTGCACACGTACAGGTTTGCCAAGGCTGGTTTTGTGACTTATGTTACATAATTTCTGTCGTT  
GTTTGTGGTATTTTATAATTGGTGGTTTCATGGTGTCTGCTGAGTCTGTTTATGATGTTGCTT  
CTCAATGTGTCAGATAGCTGGTATGTTGGTGCTATTGCATACAGAATATCATTACTTGCAGC  
CACACAATTCCTATGTTGGAACCTGTTGTTGGTAAGGCCAAGGTTGTGATTTTTATTTATGT  
TGCAATTGGTTTTTTGTGCTGTATGTATTATGGTGTCTGTATTGGATTAAACAGATTCTGTAA  
GTTGACACTTGGTGTATATGACTTTAAAGTCAGTGCTAATGAGTTAAGTATATGGTTGCTA  
ACGGGTTACGTGCTCCTAGAGGTGTGTTGACTCAATGCTTCTGTCTATGAAACTTGTTGGTA  
TTGGTGGTGATAAAGTTATAAAGTTTTCCACGGTACAATCCAACTGACAGATATTAAGTG  
CACTAATGTTGTTTGTCTGGCTGTTTGTCTAGTATGAACATTGCAGCTAATACTAAAGAAT  
GGGCTCATTGTGTCGAATTGCACAACAAGATTAATCTTTGTGATGATCCTGAAAAGGCACA  
AGAAATGCTTCTTGCATTGCTAGCTTTCTTTATTAGCAAGCAAAAAGATTTTGGCATTGATG  
ATTTGATTGATTCATACTTTGACAGTTCTAGTGTACTGCAGAGTGTTGCGTCTACATTGCTCA  
ATATGCCTTCTTACATCGCTTATGAAAGTGCGCGGCAAAGTTATGAGGATGCTGTTAATAAT  
GGTTCCTCTCCACAGCTCATTAAAGCAGCTTAAGCGTGCTATGAATATTGCTAAAGCTGAGTT



TGACCATGAGTCTTCGGTTCAAAAGAAGATTAATCGCATGGCCGAACAAGCTGCTGCTCAG  
ATGTTCAAGGAAGCACGTGCTGTTAATAGAAAGTCCAAGATTATTAGTGCTATGCACTCTTT  
GCTTTTTAGCATGCTTCGTCGCTTGGACATGTCTAGTGTGGACACTATTCTTAGTCTTGCAA  
AGATGGTATAGTTCCTCTGTCGGTGATTCCCGCCACTTGTGCTACTAACTTTCTATTGTTAG  
CAGTGATTTTACGTCATTTGCTAAGATTGTTAAAGATGGTTGTGTGCACTATGCTGGTGTGGT  
GTGGTCGATTGCTGAAATCACTGATGCTGATGGTAAGATCGTACATCTTAAGGAGGTTGTCTG  
AAGAGAACACAGATTCACCTTACATGGCCACTCTTTGTTAGTTGCGTGCGTGTTGTGAAGCTT  
CAGAATAATGAGATTATTCCTGGTAAGCTTAAACAGCGTGTTGTAAAGGCAGAGGGTGATG  
GTTTCAGTGTTGAAGGTAAAGCACTCTTTAATAATGAGGGTGGTAAACTTTTTATGTACGCT  
TTTGTGCTGACAAACCAGATTTGAAATATGTTAAGTGGGAATTTGATGGTGGTTGTAACAC  
TATTGAACTTGAGCCACCTTGTAGGTTTGCTGTTGAAACTGCAAATGGCACTGTTATAAAGT  
ACTTGTATTTTGTGCGTAATCTAAACACATTGCGCAGGGGTGCAGTTTTGGGCTTTATTGGTG  
CTACAGTGCGTTTGCAAGCCGGTAAACAAACAGAACTTGCTTCTAATTCGGCATTGCTTACT  
ATGTGTGCTTTTGTGCTGTTGATCCTGCCAAGACGTATATTGACGCTGTTAAGAAGGGTGTTAA  
ACCTGTCGGGAATTGCGTCAAGATGTTGTCAAATGGTTCAGGTACTGGCCAAGCTATTACTG  
TTGGTGTTGAAGCTAATTCTAATCAAGATTCTTATGGTGGCGCTTCTGTCTGTTTGTATTGCC  
GTGCACATGTTGAACATCCTACGATGGATGGTGCGTGTCGTTACAAAGGCAAGTATGTTCA  
AGTCCCACTTGGAATGCGGATCCTATACGGTCTGTTTAGAAAATGAGCCATGTAAAGTTT  
GTATGTGCTGGTTGAATAATGGTTGCACTTGTGATAGAACTTCTATTAGAGTGTTGATACG  
AGTTATTTAAACGAGCACGGGGCTCTAGTGCAGCTCGACTAGAGCCCTGTAATGGAAGTGA  
CACGGATCGTGTAGTCCGTGCTTTTGACATTTACAATAAGGATGTTGCGTGTATTGGCAAGT  
TTCTTAAGGTCAATTGTGTCCGTTTTAAGAATCTTGACAAGCATGATGCCTTCTTTGTTGTAA  
AACGTTGTACGAAGTCTGTTCATGGAACACGAGCAGTCCATATATGACAAGCTTCACAGTTG  
TGGTGCAGTTGCAGTTCATGATTTTTTCTTGTGGAAAGATGGCCGTTCAGTTTTTGGTAATAT  
TAGCAGGCAAAACCTGACTAAGTATACAATGATGGACTTGTGTTATGCTTTGAGAAATTTTG  
ATGAGCGTAATTGTGAAACACTTAAAGAAATCTTGTCTTACTGGTTGCTGTGACTATTCA  
TATTTTGAAAATAAGGATTGGTACGATCCAGTTGAAAATGAGGACATTCACAAAGTTTATG  
CACACCTTGGAAGTGTGTCGCTAATGCATTGCTTAAAGTGCGTAAAGCTTTGCGATGCGATG  
GTAGAGGCAGGTGTAGTGGGTGTGTTAACTTGTGATAACCAAGACCTTAATGGTGATTTTTA  
TGATTTTGGTGACTTTGCTACAACAATACCTAAAATGGGTGTACCATTATGTACCTCTTATTA  
CTCTTATATGATGCCTGTAATGGGTATGACCAATTGTCTTGCATCTGAGTGTTTTATTAAGAG  
TGACATTTTTTGGTAGTGATTTTAAGACCTATGATTTGCTTGAGTACGACTTTACAGAGCACA  
AAGAGGCTTTGTTTCGTAAGTACTTCAAGTATTGGGGTCAGGATTACCACCCTAATTGTGCT  
GATTGTCACGACGAGCTTTGTATTGTTTATTGTGCGAATTTTAATACGTTGTTGCTACGACT  
ATTCCTAATACGGCTTTTGGTCTCTGTGTGCGCAAAGTGTTTGTGATGGTGTGCCACTTGTT  
ACTACAGCTGGCTACCATTTCAGCAGTTGGGCCTTGTTTGAATAAGGATATAAATACTC  
ACTCTACTCGTTTGAGTGTAATGAGTTGTTACAGTTTGTACAGACCCTGCACTTTTGATAG  
CTTCATCACCTGCCCTTGTTGATCAGCGTACTGTTTGTTTTTCAGTCGCTGCCTTGAGTACTG  
GTATGACAAATCAGACAGTTAAGCCAGGCCACTTTAATAAAGAGTTCTACGACTTTTTGAG  
ATCGCAAGGATTTTTTGAAGAAGGCTCTGAATTAACCTTTAAAGCATTCTTCTTTGCACAGA  
AGGGTGATGCTGCTGTCAAAGATTTTGAAGTACTATCGTTATAATAGACCAACTATGCTAGAC  
ATTTGTCAGGCTAGAGTCACTTATAAAATAGTGCAGCGTTATTTTGAGTGCTATGAGGGTGG  
CTGTATTGCCGCTAAGGATGTTGTTGTTACTAACCTCAATAAAAGTGCAGGTTATCCACTTA  
ATAAATTTGGTAAAGCTGGTTTGTATTATGAGTCTCTTAGTTATGAGGAACAAGATGCACTA  
TACGCTCTTACAAAGCGTAATGTGTTACCTACTATGACACAGCTTAACTTAAATATGCAAT  
CAGTGGTAAAGAACGTGCTAGGACTGTTGGTGGTGTTCATTGTTGTCTACTATGACTACTA  
GACAGTTTCATCAGAAACACCTTAAGTCCATTGTTAATACACGTAATGCATCTGTTGTCATT  
GGTACCACAAAATTTTATGGTGGTTGGGACAACATGCTTAAAGAACCTTATTGATGGTGTCTG  
ACAATGCGTGCCTTATGGGTGGGATTATCCTAAGTGCATCGTGCCTTCTAATATGATT  
CGCATGATTTCTGCCATGATTTTGGGTTCGAAGCATGTTACTTGCTGTGATTCTTCTGATAAA  
TATTACCGTCTCTGTAATGAGCTCGCTCAAGTGTTGACAGAAGTTGTATATTCTAATGGCGG  
GTTTTATCTCAAGCCTGGTGGTACCCTTCAGGCGATGCTACAACGGCTTATGCGAACTCTG

TGTTTAATATTTTTCAAGCTGTTAGCGCCAATATTAACAGGTTGCTCAGCATTGATAGCAAT  
GTGTGTAATAATATTGGTGTAAAGAGTCTGCAGCGTAAGCTATATGATTGTTGTTATAGATC  
TTCTTCAGTAGATGATTCTTTTGTAGACAGTTATTATTGCTACTTGCGGAAACATTTTTCTATG  
ATGATTTTGTGAGATGACGGTGTGTGTGTTATAATAAAGATTATGCTGATTTGGGTTATGTG  
GCAGATATTAATGCCTTTAAAGCTACCCTATATTATCAGAATAATGTCTTTATGAGTACTGC  
TAAATGCTGGGTGGAGCCAGACATTAGCAAAGGTCCTCATGAGTTCTGTTACAGCATACA  
ATGCAGATTGTAGATTCTGACGGCAAGTATTATTTGCCATACCCAGACCCATCTAGAATATT  
GTCTGCTGGTGTATTTGTCGATGATGTTGTTAAGACTGACGCTGTGATATTGTTGGAGCGCTA  
CGTCTCATTGGCAATCGACGCATATCCTTTGTCTAAACATCATAATCCTGAGTATAGAAAAG  
TGTTTTATACGCTTCTAGATTGGGTTAAGCACCTACACAACACACTTAATCAGGGCGTGCTT  
GAGTCTTTCTCCGTTACATTGCTTGAGGATGTATCCTCTAAGTTTTGGGATGAGAGTTTTTAT  
GCTAGTTTGTATGAAAAGTCTACAGCACTTCAAGCCGAGGCCTATGTGTTGTTTGTGGTTC  
TCAAACGTACTGCGTTGTGGTGATTGTCTTAGACGACCCATGTTGTGACTAAGTGTGCGT  
ATGACCATGTTGTCACCACGAATCATAAATTCATTCTGGCTATAACACCTTATGTTTGTAAAT  
GCTTCTGGTTCACCGTTAATGATGTGACTAAGTTGTATTTAGGAGGCTGAGTTACTGGTGT  
ATAGACCATAAACCTACGCTGTCACCTGCCACTTTGTAGTGCAGGTAATGTTTTTGGTTTGT  
CAAGAACTCTGCTACTGGTTCACCGGATGTAGAGGTTTTTAATACACTTGCCACGTCAGATT  
GGACTGACGTTAAAGACTACAAGCTGGCTAATGAATGCAAGGATTCTCTTAGGCTTTTTGC  
GGCTGAGACTGTTAAAGCCAAAGAAGAGAGTGTTAAATCCTCTTATGCTTGTGCTACACTT  
AAAGAAGTTGTTGGGCCACGTGAGTTGATTCTTAGCTGGGAGTGCGGAAAAATTAAACCGC  
CACTTAACCGTAATTCAGTGTTTACGTGTTTCCAGATTTCTAAAGACTCTAAGTTCAGGTTG  
GAGAGTTTACGTTGAAAAATTGGATTACGGTCTGATGCTGTGTGCTACAAGTCTACCACC  
ACAGTCAAATTAGTGCCTGGTATGATTTTTGTTCTCACATCACACAATGTACAGCCGCTTAG  
GGCTCCCACTATTGCTAATCAAGAACGCTATGCTTCAATTTACAAACTGCACCCCACTTTTA  
ATATTAGTGATGCTTATGCCAATTTGGTGCCGTACTACCAAATGATTGGCAGACAACGAAT  
CACTACTATTCAAGGCCACCGGGAAGTGGAAGTCGCATTGTGTTATAGGTCTGGGTCTTT  
ATTACCCAGGTGCTAGGATGGTTTTTTCGGGCTTGCTCTCATGCAGCCGTAGATTCACTTTGTG  
TCAAGGCTGCCACTGCTTATAGTGTAGACAAATGCACCTCGTATTATCCCTGCCCGTGCTAGG  
GTTGAGTGTTATAGTGGATTAAAGGTAATAAACACTCAGGCACAGTACATCTTTTCAACAGT  
CAATGCACTCCCTGAGTGTAATGTTGACATAGTTGTTATAGATGAAGTGTCTATGTGTACTA  
ATTATGACCTGTCCGTTATTAATCAGCGGTTGTCTTACAAACATATTGTTTATGTGGGTGACC  
CACAGCAATTACCCGCGCCACGTACCATGATCACTAAAGGCGTTCTCGAACCTAAGGACTA  
TAATGTTGTAACCTCAGAGGATGTGTGCTGTTGGGCCAGATGTCTTCTGCATAAATGTTACA  
GATGTCCTGCGGAGATTGTTAAAACAGTCTCAGAGTTGGTTTACGAGAATAAGTTTGTACCT  
GTTTCATGCTGATAGCAAACAGTGCTTTAAACTGTTTTGTAAGGGTAATGTTTCAGGTTGACAA  
TGGTTCTAGTATTAACAGAAAGCAATTGGATATCGTTAAGATGTTCTTGGCTAAGAATCCAC  
GTTGGTCTAAAGCTGTGTTTATCTCACCTTATAAATAGTCAAAATTATGTGGCTAGTAGGGTTC  
TGGGTTTGCAGATTACAGACCGTTGATTCCTCTCAAGGTAGTGAATATGACTATGTCATATAT  
ACACAGACGTCAGACACAGCACATGCTTGCAATGTTAATAGATTTAATGTTGCAATCACAA  
GAGCCAAGAAGGGTATTCTTTGTGTTATGTGTGATCGGGATCTGTTTGATGCTCTGAAATTTT  
TCGAGATCAAGCTTTCTGACTTGACAGGCTAGTGGCGACGGCTGTGGTCTTTTTAAAGATTGT  
TACAGGAAAGATGATGAATTACCTCCATCTCATGCAGCTACCTATATGGCCTTGTCTGACA  
ATTTTAAAGGTCAATGGTGATCTTGCTGTGCAGATTGGCTTTAAAGGTGTGTGTAAGTATGAG  
CATGTTATTTCTTTTATGGGCTTCAGGTTTGACATTAATGTGCCTGAACAGCATAGTCTTTTC  
TGTACCAGGAATTTGCAATGCGCCATGTGCGTGTTGGCTTGGTATGGATGTAGAAGGTGC  
CCATGTTACAGGTGAAAATGTAGGTACGAACGTACCATTACAAGTAGGCTTCTCTAATGGT  
GTTGATTTTGTGTCCAACCAGAAGGTTGTGTTGTCACCTGAGACAGGCAGGATCGTACC  
TGTTAGAGCTCGTGCTCCGCCAGGTGAACAGTTCACACATTTGGTCCCCCTGCTTCGTAAGG  
GACAACCATGGGCTGTGGTTTCGTAAACGCATTGTGCAGATGTGTTGCGATTACTTGGTGAAC  
CTATCAGACATATTAATCTTTGTTTTGTGGGCTGGTGGTTTGGAGTTGACTACCATGAGATAT  
TTTGTTAAATTTGGACCAATCAAAGTTTGTGAGTGCGGCAAAGTGGCCACTTGTTACAATA  
GTGTGACTCATGCATACTATTGCTTCAAGCATGCCTTAGGGTGTGATTATTTGTACAATCCTT

ATGTTATTGACATTCAGCAGTGGGATTATACAGGTTCACTTAGCCATAATCATCATGAGCAT  
TGTAATGTACATCGCAATGAGCATGTTGCATCAGGTGATGCTATTATGACTCGTTGTCTTGC  
TGTGTATGATTGCTTCGTC AAGAACGTTGACTGGTCCATTACTTACCCATTCAATTGCTAATGA  
ACATGCCATTAATAAGAGTGGTAGAGTTGTGCAATCTATGGTTGTCAAATCAGCTATAAAG  
TTATATAATCCTAAAGTAATTCATGATATTGGTAATCCTAAAGGTATTAGGTGTGCAGTTAC  
TGATGCACACTGGTTTTGCTATGATAAGCAGCCCCCTCAATTCCAATGTCAAGTTGCTTGAGT  
ATGATTATATAACTCATGGTCAGATGGATGGGTTATGCCTATTTTGGAAATTGCAATGTTGAC  
ATGTATCCTGAATTTTCTATTGTGTGCCGTTTTGACACTCGTTGTAGGTCAAATCTCAACTTA  
GAAGGTGTTAATGGAGGTTCACTTTATGTCAACAACCATGCATTTTTTACACCTGCCTTTGAT  
AAGCGCGCAATGGCTAAACTTAAGCCTATGCCCTTCTTTTTCTATGATGACACGCCTTGCGA  
TCGTGTTCAAGGATCAAATAAATTATGTACCACTGCGTGCTAGTACTTGTATTACAAAGTGTA  
ATATTGGTGGTGCTGTTTGCAGTAAGCATGCCAACATGTTTCATGCCTATGTTAATGCATAT  
AATACTTTACGCAGGCGGGTTTTACTATTTGGGTTCTGTAACTTTTGATTATTCAACCTTT  
GGCAGACATTTGTTGAAACTAATTTGCAAGGCTTGAGAACATAGCGTTTAATGTCCTCAA  
GAAAGGGTCTTTGTTGGTGTAGAGGGTGAACCTACCGGTTGCTATCGTTAATGACCGTGTGC  
TGGTACGTGATGGCACCGTGGATAATTTGATTTTTACTAATAAAACCTCATTACCCACTAAT  
GTTGCTTTTGAGCTTTACGCCAAGCGTAAAATGGGTTTGACACCACCTCTTGCTGTTCTCAG  
GAATCTCGGTGTTGTAGTACCTATAAGTTTGTGCTATGGGATTATGAGGCAGAAAGACCAT  
TTACTACTTTTACTAAAAATGTTTGCAGTTACACCGACTTTGATGAGGATGTGTGCACTTGCT  
TTGATAATAGCATTCAAGGTTTCGTTTGAACGCTTTTCAATGGCAAACAATGCAGTGCTTATT  
TCCACGTCTGCTGTTAAGAAGCTTACTTGTATTAAGCTTAACTATGGTTTGCTTAATGGTGTG  
GCTGTTTCTAAGACTGGTGACAAGCCTGTTACATGGTATATCTATGTCCGGAAAAATGGTCA  
ATTTGTTGACCAATTTGACGGATACTTTACTCAGGGGCGTACTACTATTGATTTCTTACCTCG  
TAGTGTTATGGAGGAAGACTTTTTAAACCTTGATATGGGTTTGTTCATTAGCAAGTATGGTC  
TTGAAGACTATGCTTTTGAACATGTTGTGTATGGTGACGTGTCTGGTACTACACTTGGTGA  
CTCCATTTATTAATTTCTCAAGTACGCCTTGAAAAATGGGTGTCTTGAAAGTTGATGAGTT  
CACACATAGTGAGGATAGTACATTGAAGTCCTGTACAGTCACCTATTCTAATGATCCTAGTA  
GTAAAAATGGTTTGTACCTATATGGATTTGTTGCTAGATGATTTTGTACCATTTTAAAAATCTT  
TGGATTTGGGTGTAATTTCCAGAGTTCATGAAGTTGTAGTTGATTGTAAGGTTTGGCGTTGG  
ATGTTGTGGTGTAAGGACCACAAAGTTCAAACGTTCTACCCACAGTTGCAGTCGTCAGAAT  
GGAAATGTGGCTATTCCATGCCCTCACTGTATAAAATACAGCGTATGTGTCTTGAGCCCTGT  
AATTTGTACAATTATGGTGCTAGTCTTAAGCTACCTGAAGGTATCATGTTTAAACGTGGTTAA  
ATACACTCAGTTGTGTCAATACTTGAATAGTACTACTATGTGTGTACCGCATAATATGCGTG  
TACTACATCTTGGTGCTGGCTCAGATAAAGGAGTCGCACCGGGTACTGCTGTATTGCGTCGT  
TGGTTACCCAGTGATGCTATTATTGTTGACAATGATGTTAATGACTATGTTAGTGATGCAGA  
TTTCAGTGTAACAGGGGATTGCGCCACTTTGTACTTACAGGATAAGTTTCGACTTAGTGGTTT  
CAGACATGTATGATGGCCGTATTAAACAGTGTGATGGTGTTAACGTTTCAAAGGATGGCTT  
CTTTCCTTACATCAATGGTGTGATATCAGAGAAGCTTTCCCTAGGTGGTACAGTTGCCATTA  
AGATTACTGAGTATAGCTGGAATAAGCGGCTGTATGAGTTGATACAAAAGTTTGAATTTTG  
GACGTTGTTTTGTACTAGTGTGAATACATCATCGTCTGAAGCTTTTCTAATTGGTGTCAACTA  
TCTTGGCGACTACGCCACTCAACCCATTGTGGATGGTAATACTATGCACGCTAATTATGTGT  
TTTGGCGTAATTCTACCATTATGTCAATGTCATATAATAGTGTGCTTGACCTAGCAAAATTTA  
ATTGTAGACACAAAGCCACTGTTGTTATTTCACTTAAAGAAAGTGATTTGAATGATGTTGTG  
GTAGGCCTCATAAAGAATGGAAAGTTGTTGGTTAGAAAGAGTGGTGTCAATTTGTGACTATG  
GTAACCATTTAGTTTCAACTAAATAA

>SUOHC3005

AGTGTGATACGAGTTATTTAAACGAGCACGGGGCTCTAGTGCAGCTCGACTAGAGCCCTG  
TAATGGAAGTACACGGATCGTGTAGTCCGTGCTTTGACATTTACAATAAGGATGTTGCGT  
GTATTGGCAAGTTTCTTAAGGTCAATTGTGTCCGTTTTAAGAATCTTGACAAGCATGATGCC  
TTCTTTGTTGTAACGTTGTACGAAGTCTGTATGGAACACGAGCAGTCCATATATGACAA  
GCTTACAGTTGTGGTGCAGTTGCAGTTCATGATTTTTTCTTGTTGGAAAGATGGCCGTTCACT

TTTTGGTAATATTAGCAGGCAAAACCTGACTAAGTATACAATGATGGACTTGTGTTATGATT  
TGAGAAATTTTGATGAGAGTAATTGTGAAACACTTAAAGAA

>SUOHC3007

ACTATTCAAGGCCACCGGGAAGTGGCAAGTCTCATTGTGTTGTAGGTCTGGGTCTTTATTA  
CCCAGGTGCTAGGATGGTCTTTGCGGCTTGCTCTCATGCAGCCGTAGATTCACTTTGTGTTA  
AGGCTGCCACTGCTTATAGTGTAGACAAATGCACTCGTATTATCCCTGCCCCGTGCTAGGGTT  
GAGTGTTATAGTGGGTTTAAGGTAAATAACACTCAGGCACAGTATATCTTTCAACAGTCA  
ACGCACTCCCTGAGTGTAATGTTGACATAGTTGTTATAGATGAAGTGTCTATGTGTACTAAT  
TATGACCTGTCCGTTATTAATCAGCGGTTGTCTTATAAACATATTGTTTATGTGGGTGATCCA  
CAGCAATTACCAGCGCCACGTACCATGATCACTAAAGGCGTCTCGAACCTAAGGACTATA  
ATGTTGTAACCTCAGAGGATGTGTGCTGTTGGGCCAGATGTCTTCTTGCAATAAATGTTACAGA  
TGTCTCTGCTGAGATTGTTAAACAGTCTCAGAGTTGGTTTATGAGAATAAGTTTGTACCTGT  
TCATGCTGATAGCAAACAGTGCTTTAACTGTTTTGTAAGGGTAATGTTTCAAGTTGACAATG  
GTTCTAGTATTAACAGAAAGCAATTGGATATCGTTAAGATGTTCTTGCTAAGAATCCACGT  
TGGTCTAAAGCTGTGTTTATCTCACCTTATAATAGTCAGAATTATGTGGCTAGTAGGGTTTTG  
GGTTTGCAGATTCACTGTTGATTCTCTCAAGGTAGTGAATATGACTATGTCATATACAC  
ACAGACATCAGACACAGCACATGCTTGCAATGTTAATAGATTTAATGTTGCAATTACAAGA  
GCCAAGAAGGGTATTCTTTGCGTTATGTGTGATCGGGAGTTGTTTGATGCTCTGAAATTTTC  
GAAATCAAGCTTTCTGACTTGCAGGCTAGTGGTGATGGCTGTGGTCTTTTTAAAGATTGTTA  
CAGGAAAGATGATGAATTACCTCCATCTCATGCAGCTACCTATATGGCCTTGTCTGACAAC  
TTAAGGTCAATGGTGATCTTGCTGTGCAGATTGGCTTTAAAGGTGTGTGTAAGTATGAGCAT  
GTTATTTCTTTTATGGG

>SUOHC2001-ON893137

AGTGTGCACACGAGTTATTTAAACGAGCACGGGGCTCTAGTGCAGCTCGACTAGAGCCCTG  
TAATGGAAGTACACGGATCGTGTAGTCCGTGCTTTTGACATTTACAATAAGGATGTTGCGT  
GTATTGGCAAGTTTCTTAAGGTCAATTGTGTCCGTTTTAAGAATCTTGACAAGCATGATGCTT  
TCTTTGTTGTAACCGTTGTACGAAGTCTGTTCATGGAACACGAGCAGTCCATATATGACAA  
GCTTCACAGTTGTGGTGCAGTTGCAGTTTCATGATTTTTTCTTGTGGAAAGATGGCCGTTCACT  
TTTTGGTAATATTAGCAGGCAAAACCTGACTAAGTATACAATGATGGACTTGTGTTATGCTT  
TGAGAAATTTTGATGAGCGTAATTGTGAAACACTTAAAGAAATTCCTTGTCCTTACTGGTTGC  
TGTGACTATTTCATTTTTGAAAATAAGGATTGGTACGACCCAGTTGAAAATGAGGACATTC  
ATAAAGTTTATGCACACCTTGGAACTGTTGTCTCTAATGCATTGCTTAAGTGTGTTAAGCTTT  
GCGATGCGATGGTAGAGGCAGGTGTAGTGGGTGTGTTAACACTTGATAACCAAGACCTTAA  
TGGTGATTTTTATGATTTTGGTGACTTTGCTACAACAATACCTAAAATGGGTGTACCATTATG  
TACCTCTTATTACTCTTATATGATGCCTGTAATGGGTATGACCAATTGTCTTGCATCTGAGTG  
TTTTATTAAGAGTGACATTTTTGGTAGTGATTTTAAGACCTATGATTTGCTTGAGTACGACTT  
TACAGAGCACAAAGAGGCTTTGTTTCGTAAGTACTTCAAGTATTGGGGTCAGGATTACCAC  
CCTAATTGTGCTGATTGTACGACGAGCTTTGTATTGTTCAATTGTGCGAATTTTAATACGTTG  
TTCGCCACGACTATTCCTAATACAGCTTTTGGTCCTCTGTGTGCGCAAAGTGTGTTGATGGT  
GTGCCACTTGTTACTACAGCTGGCTACCATTTCAGCAGTTGGGCCTTGTTTGAATAAAGGA  
TATAAATACTCACTCTACTCGTTTGAGTGTAATGAGTTGTTACAGTTTGTACAGACCCTG  
CACTTTTGATAGCATCATACCAGCCCTTGTTGATCAGCGTACTGTTGTTTTTCAGTCGCTG  
CCTTGAGTACTGGTATGACAAATCAGACAGTTAAGCCAGGCCACTTTAATAAAGAGTTCTA  
CGACTTTTTGAGATCGCAAGGATTTTTGAAGAAGGCTCTGAATTAACCTTTAAAGCATTCT  
TCTTTGCACAGAAGGGTGATGCTGCTGTCAAAGATTTTGACTACTATCGTTATAATAGACCA  
ACTATGCTAGACATTTGTGAGGCTAGAGTCACTTATAAAATAGTGCAGCGTTATTTTGAGTG  
CTATGAGGGTGGCTGTATTGCCGCTAAGGATGTTGTTGTTACTAACCTCAATAAAAGTGCAG  
GTTACCCACTTAATAAATTTGGTAAAGCTGTTTTGTATTATGAGTCTCTTAGTTATGAGGAA  
CAAGATGCACTATACGCTCTTACAAAGCGTAATGTGTTACCTACTATGACACAGCTTAACCT  
TAAATATGCAATCAGTGGTAAAGAACGTGCTAGGACTGTTGGTGGTGTTCATTGTTGTCTA  
CTATGACTACTAGACAGTTTCATCAGAAACACCTTAAGTCCATTGTTAATACAGTAATGCA  
TCTGTTGTCATTGGTACCACAAAATTTTATGGTGGTTGGGACAACATGCTTAAGAACCTTAT

TGATGGTGTGACAATGCGTGCCTTATGGGTTGGGATTACCCTAAGTGTGATCGTGCCTCC  
CTAATATGATTTCGCATGATTTCTGCCATGATTTTGGGTTTGAAGCATGTTACTTGCTGTGATT  
CTTCTGATAAATATTACCGTCTCTGTAATGAGCTCGCTCAAGTGTGACAGAAGTTGTATAT  
TCTAATGGTGGGTTTTATCTCAAGCCTGGTGGTACCACTTCTGGCGATGCTACAACGGCTTA  
TGCGAACTCTGTGTTAATATTTTTCAAGCTGTTAGCGCCAATATTAACAGGTTGCTTAGCAT  
TGATAGCAATGTGTGTAATAATATTGGTGTAAAGAGTTTGCAGCGTAAGCTATATGATTGTT  
GTTACAGATCTTCTTCAGTAGATGATTCTTTTGTAGACAGTTATTATTGCTACTTGCGGAAAC  
ATTTTTCTATGATGATTTTGTGAGATGACGGTGTGTGTGTTATAATAAAGATTATGCTGATT  
TGGGTTATGTGGCAGATATCAATGCCTTTAAAGCTACCCTATATTATCAGAATAATGTCTTT  
ATGAGTACTGCTAAATGCTGGGTGGAGCCAGACATTAGCAAAGGTCCTCATGAGTTCTGTT  
CACAGCATACTATGCAGATTGTAGATTCTGACGGCAAGTATTATTTGCCATACCCAGACCC  
ATCTAGAATATTGTCTGCTGGTGTATTTGTGCGATGATGTTGTTAAGACTGACGCTGTGATATT  
GTTGGAGCGCTACGTCTCATTGGCAATCGACGCATATCCTTTGTCTAAACATCATAATCCTG  
AATATAGAAAAGTGTTTTATACACTTCTAGATTGGGTAAAGCATCTACACAACACACTTAAT  
CAGGGCGTGCTTGAGTCTTTCTCCGTTACATTGCTTGAGGATGTATCCTCTAAGTTTTGGGAT  
GAGAGTTTTATGCTAGTTTGTATGAAAAGTCTACAGTACTTCAAGCCGCAGGCCTATGTGT  
TGTTTGTGGTTCTCAAAGTGTACTGCGTTGTGGTGAATTGTCTTAGACGACCTATGTTGTGCAC  
TAAGTGTGCTTACGACCATGTTGTCAACCAAGTATCAAAATTCATTCTGGCTATAACACCTT  
ACGTTTGTAAATGCTTCTGGTTGCACCGTTAATGATGTGACTAAGTTGTATTTAGGAGGTCTG  
AGTTACTGGTGTATAGACCATAAACCTACACTGTCACTACCCTTGTAGTGCAGGTAATGT  
TTTTGGTTTGTATAAAAAGTCTGCTACAGGTTACCCGGATGTAGAGGTTTTAATACACTTGC  
CACGTCAGATTGGACTGACGTTAAAGATTACAAGCTGGCTAATGAATGCAAGGATTCTCTT  
AGGCTTTTTGCGGCTGAGACTGTTAAAGCCAAAGAAGAGAGTGTAAATCCTCTTATGCTTG  
TGCTACACTTAAAGAAGTTGTTGGGCCACGTGAGTTGATTCTTAGTTGGGAGTGCGGAAAA  
ATTAAACCGCCACTTAACCGTAATTCAGTGTTCAGTGTTCAGATTCTAAAGACTCTAA  
GTTCCAGGTTGGAGAGTTTACGTTTGA AAAAATTGGATTACGTTCTGATGCTGTGTGTACA  
AGTCTACCACCACAGTTAAATTAGTGCTGGTATGATTTTTGTTCTCACATCACACAATGTA  
CAGCCGCTTAGGGCTCCCACTATTGCTAATCAAGAACGCTATGCTTCAATTTATAAACTGCA  
CCCTACTTTTAATATTAGTGATGCTTATGCCAATTTGGTGCCGTAACCAATGATTGGCA  
GACAACGAATCACTACTATTCAAGGCCACCGGGAAGTGGCAAGTCCCATTGTGTTATAGG  
TCTGGGTCTTTATTACCCAGGTGCTAGGATGGTCTTTGCGGCTTGCTCTCATGCAGCCGTAG  
ATTCACTTTGTGTCAAGGCTGCCACTGCTTATAGTGTAGACAAATGCACCTCGTATTATCCCT  
GCCCCTGCTAGGGTTGAGTGTATAGTGGGTTTAAAGGTAAATAACACTCAGGCACAGTACA  
TCTTTTCAACAGTCAACGCACTCCCTGAGTGTAAATGTTGACATAGTTGTTATAGATGAAGTG  
TCTATGTGTACTAATTATGACCTGTCCGTTATTAACCAGCGGTTGTCTTATAAACATATTGTT  
TATGTGGGTGACCCACAGCAATTACCAGCGCCACGTACCATGATCACTAAAGGCGTTCTCG  
AACCTAAGGACTATAATGTTGTAACCTCAGAGGATGTGTGCTGTTGGGCCAGATGTCTTCTTG  
CATAAATGTTACAGATGTCCTGCTGAGATTGTTAAACAGTCTCAGAGTTGGTTTATGAGAA  
TAAGTTTGTACCTGTTTCATGCTGATAGCAAACAGTGTTTTAACTGTTTTGTAAGGGCAATG  
TTCAGGTTGACAATGGTTCTAGTATTAACAGAAAGCAATTGGATATCGTCAAGATGTTCCCT  
GCTAAGAATCCACGTTGGTCTAAAGCTGTGTTTATCTCACCTTATAATAGTCAGAATTATGT  
GGCTAGTAGGGTTTTGGGTTTGCAGATTCAGACTGTTGACTCCTCTCAAGGTAGTGAATATG  
ACTATGTATATACACACAGACGTCAGACACAGCACATGCTTGCAATGTTAATAGATTTAA  
TGTTGCAATTACAAGAGCCAAGAAGGGTATTCTTTGTGTTATGTGTGATCGGGAGTTGTTTG  
ATGCTCTGAAATTTTTCGAGATCAAGCTTTCTGACTTGCAGGCTAGTGGTGATGGCTGTGGT  
CTTTTTAAAGATTGTTACAGGAAAGATGATGAATTACCTCCATCTCATGCGGCTACCTATAT  
GGCCTTGTCTGACAACTTTAAAGGTCAATGGTGATCTTGCTGTTTCAAGTTGGCTTTAAAGGTG  
TGTGTAAGTATGAGCATGTTATTTCTTTTATGGGCTTCAGGTTTGATATTAATGTGCCTGAAC  
AGCATAGTCTTTTCTGTACCAGGAATTTTGCAATGCGCCACGTGCGTGGTTGGCTTGGTATG  
GATGTAGAAGGTGCCACGTTACAGGTGAAAATGTAGGTACTAATGTACCATTACAAGTAG  
GCTTCTCTAATGGTGTGATTTTGTGTGTTTCAACCGGAAGGTTGTGTTGTCACTGAGACAGGC  
AGCAGGATCGTACCTGTTAGAGCTCGTGCTCCGCCAGGTGAACAGTTCACACATTTGGTCC

CCCTGCTTCGTAAGGGACAACCGTGGGCTGTGGTTCGTAAACGCATTGTTTCAGATGTGTTGC  
GATTACTTGGTGAACCTATCAGACATATTAATCTTTGTTTTGTGGGCTGGTGGTTTGGAGTTG  
ACTACCATGAGATATTTTGTAAAAATTGGACCAAGCAAAGTTTGTGAGTGCGGCAAGGTGG  
CCACTTGTTACAATAGTGTGACTCATGCATACTACTGTTTCAAGCATGCCTTAGGGTGTGAT  
TATTTGTACAATCCTTATGTTATTGACATTCAGCAGTGGGATTATACAGGTTCACTTAGCCAT  
AATCATCATGAGCATTGTAATGTACATCGCAATGAGCATGTTGCATCTGGTGATGCTATTAT  
GACTCGTTGTCTTGCTGTGTATGATTGCTTCGTCAAGAACGTTGATTGGTCCATTACTTACCC  
ATTCATTGCTAATGAGCATGCCATTAATAAGAGTGGTAGAGTTGTGCAATCTATGGTTGTCA  
AAACAGACCATGAGTTATATAATCCTAAAGTAATTCATGATATTGGTAATCCTAAAGGTAT  
TAGGTGTGCAGTTACTGATGCACACTGGTTTTGCTATGATAAGCAGCCCCCTCAATTCCAATG  
TCAAGTTGCTTGAGTATGATTATATAACTCATGGTCAAATGGATGGGTTATGCCTATTTTGG  
AATTGCAATGTTGACATGTATCCTGAATTTTCTATTGTGTGCCGTTTTGACACTCGTTGTAGG  
TCAAATCTCAACTTAGAAGGTGTTAACGGAGGTTCACTTTATGTCAACAATCATGCATTTTT  
TACACCTGCATTTGATAAGCGTGCAATGGCTAAACTTAAGCCTATGCCCTTCTTTTTCTATGA  
TGACACGCCTTGCGATCGTGTTTCATGACCAGATAAATTATGTACCACTGCGTGCTAGTACTT  
GTATTACAAAGTGTAATATTGGTGGTGCTGTTTGCAGTAAGCATGCCAATATGTTTCATGCC  
TATGTTAATGCATATAATACTTTCACGCAGGCTGGTTTTACTATTGGGTTCTGTAACTTTT  
GATTTGTTTAAACCTTTGGCAAACATTTGTGCAAACTAACTTGCAAGGCTTGGAGAACATAGC  
GTTTAATGTCCTCAAGAAAGGGTCTTTTGTGGTGTAGAGGGTGAACCTACCGGTTGCTATCG  
TTAATGACCGTGTGCTGGTACGTGATGGCACCGTGGATAATTTGATTTTTACTAATAAAACC  
TCATTACCTACTAATGTTGCTTTCGAGCTTACGCCAAACGTAAAATGGGTTTGACACCACC  
TCTTGCTGTTCTCAGGAATCTCGGTGTTGTTAGTACCTATAAGTTTGTGTTATGGGATTATGA  
GGCAGAAAGACCATTTACTACTTTTACTAAAAATGTTTGCAGTTACACAGACTTTGACGAG  
GATGTGTGCACTTGCTTTGATAATAGCATTTCAGGGTTCGTTTGAACGCTTTTCAATGGCTAA  
CAATGCAGTGCTTATTTCCACATCTGCTGTTAAGAAGCTTACTTGTATTAAGCTTAACTATG  
GTTTGCTTAATGGTGTGGCTGTTTCTAAGACTGGTGACAAGCCTGTTACATGGTATATCTATG  
TCCGTAAAAATGGTCAATTTGTTGACCAATTTGACGGATATTTTACTCAGGGGCGTACTACT  
ATTGATTTCTTACCTCGTAGTGTTATGGAGGAAGACTTTTTAAACCTTGATATGGGTTTGT  
ATTAGTAAGTACGGTCTTGAGGACTATGCTTTTGAGCATGTCGTGTATGGTGACGTGTCTGG  
TACTACACTTGGTGGACTACATTTATTAATTTCTCAAGTACGCCTTGGAATAATGGGTGTCT  
TGAAAGTGGATGAGTTCACACATAGTGAGGATAGTACATTGAAGTCCTGTACAGTCACCTA  
TTCTAATGATCCTAGTAGTAAAATGGTTTGTACCTATATGGATTGTTGCTAGATGATTTTGT  
TACCATTTTAAAATCTTTGGATTGTTGGGTGTAATTTCTAGAGTTCATGAAGTTGTAGTCGATTG  
TAAGGTTTGGCGTTGGATGTTGTGGTGTAAAGGACCACAAAGTTCAAACGTTCTACCCACAG  
TTGCAGTCGTCAGAATGGAAATGTGGTTATTCATGCCCTCACTGTATAAAATACAGCGTAT  
GTGTCYTGAGCCCTGTAATTTGTACAATTATGGTGCTAGTCTTAAGCTACCTGAAGGTATCA  
TGTTTAAACGTGGTCAAATACACTCAGTTATGTCAATATTTGAATAGTACTACTATGTGTGTA  
CCGCATAATATGCGTGTAATCTTGGTGCTGGCTCAGATAAAGGAGTCGCACCTGGTA  
CTGCTGTATTGCGTCGTTGGTTACCCAGTGATGCTATTATTGTTGACAATGATGTTAATGACT  
ATGTTAGTGATGCAGATTTCACTGTAAACAGGGGATTGCGCCACTTTGTACTTACAGGATAA  
GTTGCACTTAGTGGTTTCAGACATGTATGATGGCCGTATTAAACAGTATGATGGTGTTAATG  
TTTCAAAGGATGGCTTCTTTCTTACATCAATGGTGTGATATCAGAGAAGCTTTCCCTAGGT  
GGTACAGTTGCCATTAAGATTACTGAGTATAGCTGGAATAAGCGGCTGTATGAGTTGATAC  
AAAAGTTTGAATTTTGGACGTTGTTTTGTACTAGTGTGAATACATCATCGTCTGAAGCTTTTC  
TAATTGGTGTCAACTATCTTGGCGACTACGCTACTCAGCCCATTATGGATGGCAATACTATG  
CACGCTAATTATGTGTTTTGGCGTAATTTCTACAATTATGTCCATGTCATATAATAGTGTGCTT  
GATCTAGCAAAGTTTAAATTGTAGACATAAAGCTACGGTTGTTATTTCACTTAAAGAAAGTG  
ATTTGAATGATGTTGTGGTAGGCCTTATAAAGAATGGAAAGTTGTTGGTTAGAAAGAGTGG  
TGTCATTTGTGACTATGGTAACCATTTAGTTTCAACTAAATAA

>SUOHC2004

GTGTTGTTTGTGGTTCTCAAACCTGTACTGCGTTGTGGTGATTGTCTTAGACGACCTATGTTGT  
GCACTAAGTGTGCGTATGACCATGTTGTCACCACGAATCATAAATTCATTCTGGCTATAACA

CCTTACGTTTGTAAATGCTTCTGGTTGCACCGTTAATGATGTGACTAAGTTGTATTTAGGAGGT  
 CTGAGTTACTGGTGTATAGACCATAAACCTACGCTGTCACTGCCACTTTGTAGTGCAGGTAA  
 TGTTTTTGGTTTGTATAAAAACTCTGCTACTGGTTCACCGGATGTAGAGGTTTTTAATACACT  
 TGCCACGTCAGATTGGACTGACGTTAAAGATTACAAGCTGGCTAATGAATGCAAGGATTCT  
 CTTAGGCTTTTTGCGGCTGAGACTGTAAAGCCAAAGAAGAGAGTGTAAATCCTCTTATGC  
 TTGTGCTACACTTAAAGAAGTTGTTGGGCCACGTGAGTTGATTCTTAGCTGGGAGTGTGGAA  
 AAATTAACCGCCACTTAACCGTAATTCAGTGTTCACGTGTTCCAGATTTCTAAAGACTCT  
 AAGTTCCAGGTTGGAGAGTTTACGTTTGAAAAATTGGATTACGGTTCTGATGCTGTGTGCTA  
 CAAGTCTACCACCACAGTCAAATTAGTGCCTGGTATGATTTTTGTTCTCACATCACACAATG  
 TACAGCCGCTTAGGGCTCCCACTATTGCTAATCAAGAACGCTATGCTTCAATTTATAAGCTG  
 CACCCTACTTTTAATATTAGTGATGCTTATGCCAATTTGGTGCCGTAACCAATGATTGG  
 CAGACAACGAATCACTACTATTCAAGGCCACCGGGAAGTGGCAAGTCTCATTGTGT  
 >SUOHC1001  
 AGTGTGATACGAGTTATTTAAACGAGCACGGGGCTCTAGTGCAGCTCGACTAGAGCCCTG  
 TAATGGAAGTACACGGATCGTGTAGTCCGTGCTTTTGACATTTACAATAAGGATGTTGCGT  
 GTATTGGCAAGTTTCTTAAGGTCAATTGTGTCCGTTTTAAGAATCTTGACAAGCATGATGCC  
 TTCTTTGTTGTAAAACGTTGTACGAAGTCTGTATGGAACACGAGCAGTCCATATATGACAA  
 GCTTCACAGTTGTGGTGCAGTTGCAGTTCATGATTTTTTCTTGTTGGAAGATGGCCGTTCACT  
 TTTTGGTAATATTAGCAGGCAAAACCTGACTAAGTATACAATGATGGACTTGTGTTATGCTT  
 TGAGAAATTTTGATGAGCGTAATTGTGAAACACTTAAAGAAATTCTTGTCCTTACTGGTTGC  
 TGTGACTATTCATATTTTGAAAATAAGGATTGGTACGACCCAGTTGAAAATGAGGACATTC  
 ATAAAGTTTATGCACACCTTGGAAGTGTGTCTCTAATGCATTGCTTAAGTGCCTTAAGCTTT  
 GCGATGCGATGGTAGAGGCAGGTGTAGTGGGTGTGTTAACACTTGATAACCAAGACCTTAA  
 TGGTGATTTTTTATGATTTTGGTGACTTTGCTACAACAATACCTAAAATGGGTGTACCATTATG  
 TACCTCTTATTACTCTTATATGATGCCTGTAATGGGTATGACCAATTGTCTTGCATCTGAGTG  
 TTTTATTAAGAGTGACATTTTTTGGTAGTGATTTTAAGACCTATGATTTGCTTGAGTACGACTT  
 TACAGAGCACAAAGAGGCTTTGTTTCGTAAGTACTTCAAGTATTGGGGTCAGGATTACCAC  
 CCTAATTGTGCTGATTGTACGACGAGCTTTGTATTGTTCAATTGTGCGAATTTTAATACGTTG  
 TTCGCTACGACTATTCCTAATACGGCTTTTGGTCCTCTGTGTCGCAAAGTGTTTGTTGATGGT  
 GTGCCACTTGTTACTACAGCTGGCTACCATTTCAGCAGTTGGGCCTTGTTTGGAATAAGGA  
 TATAAATACTCACTCTACTCGTTTGAGTGTAATGAGTTGTTACAGTTTGTACAGACCCTG  
 CACTTTTGATAGCATCATCACCAGCCCTTGTTGGATCAGCGTACTGTTTGTTCAGTCGCTG  
 CCTTGAGTACTGGTATGACAAATCAGACAGTTAAGCCAGGCCACTTTAATAAAGAGTTCTA  
 CGACTTTTTGAGATCGCAAGGATTTTTTGAAGAAGGCTCTGAATTAACCTTTAAAGCATTCT  
 TCTTTGCACAGAAGGGTGATGCTGCTGTCAAAGATTTTGACTACTATCGTTATAATAGACCA  
 ACTATGCTAGACATTTGTCAGGCTAGAGTCACCTATAAAATAGTGCAGCGTTATTTTGAGTG  
 CTATGAGGGTGGCTGTATTGCCGCTAAGGATGTTGTTGTTACTAACCTCAATAAAAGTGCAG  
 GTTACCCACTTAATAAATTTGGTAAAGCTGGTTTGATTATGAGTCTCTTAGTTATGAGGAA  
 CAAGATGCACTATACGCTCTTACAAAGCGTAATGTGTTACCTACTATGACACAGCTTAACCT  
 TAAATATGCAATCAGTGGTAAAGAACGTGCTAGGACTGTTGGTGGTGTTCATTGTTGTCTA  
 CTATGACTACTAGACAGTTTCATCAGAAACACCTTAAGTCCATTGTTAATACACGTAATGCA  
 TCTGTTGTCATTGGTACCACAAAATTTTATGGTGGTTGGGACAACATGCTTAAGAACCTTAT  
 TGATGGTGTGACAATGCGTGCCTTATGGGTGGGATTACCCTAAGTGTGATCGTGCACCTTC  
 CTAATATGATTTCGCATGATTTCTGCCATGATTTTGGGTTCGAAGCATGTTACTTGCTGTGATT  
 CTTCTGATAAATATTACCGTCTCTGTAATGAGCTCGCTCAAGTGTTGACAGAAGTTGTATAT  
 TCTAATGGTGGGTTTTATCTCAAGCCTGGTGGTACCCTTCTGGCGATGCTACAACGGCTTA  
 TGCGAACTCTGTGTTAATATTTTCAAGCTGTTAGCGCCAATATTAACAGGTTGCTTAGCAT  
 TGATAGCAATGTGTGTAATAATATTGGTGTTAAGAGTTTGCAGCGTAAGCTATATGATTGTT  
 GTTATAGATCTTCTTCAGTAGATGATTCTTTTGTAGACAGTTATTATTGCTACTTGCGGAAAC  
 ATTTTTCTATGATGATTTTGTGAGATGACGGTGTGTGTGTTATAATAAAGATTATGCTGATT  
 TGGGTATGTGGCAGATATTAATGCCTTTAAAGCTACCCTATATTATCAGAATAATGTCTTT  
 ATGAGTACTGCTAAATGCTGGGTGGAGCCAGACATTAGCAAAGGTCCTCATGAGTTCTGTT

CACAGCATACTATGCAGATTGTAGATTCTGACGGCAAGTATTATTTGCCATACCCAGACCC  
ATCTAGAATATTGTCTGCTGGTGTATTTGTCGATGATGTTGTTAAGACTGACGCTGTGATATT  
GTTGGAGCGCTACGTCTCATTGGCAATCGACGCATATCCTTTGTCTAAACATCATAATCCTG  
AATATAGAAAAGTGTTTTATACGCTTCTAGATTGGGTAAAGCATCTACACAACACACTTAAT  
CAGGGCGTGCTTGAGTCTTTCTCCGTTACATTGCTTGAGGATGTATCCTCTAAGTTTTGGGAT  
GAGAGTTTTTATGCTAGTTTGTATGAAAAGTCTACAGCACTTCAAGCCGCAGGCCTATGTGT  
TGTTTGTGGTTCTCAAACGTACTGCGTTGTGGTGATTGTCTTAGACGACCTATGTTGTGCAC  
TAAGTGTGCGTATGACCATGTTGTCACCACGAATCATAAATTCATTCTGGCTATAACACCTT  
ACGTTTGTAAATGCTTCTGGTTGCACCGTTAATGATGTGACTAAGTTGTATTTAGGAGGTCTG  
AGTTACTGGTGTATAGACCATAAACCTACGCTGTCACTGCCACTTTGTAGTGCAGGTAATGT  
TTTTGGTTTGTATAAAAACCTCTGCTACTGGTTCACCGGATGTAGAGGTTTTTAATACACTTGC  
CACGTCAGATTGGACTGACGTTAAAGATTACAAGCTGGCTAATGAATGCAAGGATTCTCTT  
AGGCTTTTTGCGGCTGAGACTGTTAAAGCCAAAGAAGAGAGTGTTAAATCCTCTTATGCTTG  
TGCTACACTTAAAGAAGTTGTTGGGCCACGTGAGTTGATTCTTAGCTGGGAGTGCGGAAAA  
ATTAAACCGCCACTTAACCGTAATTCAGTGTTTACGTGTTTCCAGATTTCTAAAGACTCTAA  
GTTCCAGGTTGGAGAGTTTACGTTTAAAAAATTGATTACGGTTCTGATGCTGTGTGCTACA  
AGTCTACCACCACAGTCAAATTAGTGCCTGGTATGATTTTTGTTCTCACATCACACAATGTA  
CAGCCGCTTAGGGCTCCCACTATTGCTAATCAAGAACGCTATGCTTCAATTTATAAACTGCA  
CCCTACTTTTAATATTAGTGATGCTTATGCCAATTTGGTGCCGTACTACCAAATGATTGGCA  
GACAACGAATCACTACTATTCAAGGCCACCGGGAAGTGGCAAGTCTCATTGTGTTATAGG  
TCTGGGTCTTTATTACCCAGGTGCTAGGATGGTTTTTGGGCTTGCTCTCATGCAGCCGTAGA  
TTCACTTTGTGTCAAGGCTGCCACTGCTTATAGTGTAGACAAATGCACTCGTATTATCCCTG  
CCCGTGCTAGGGTTGAGTGTTATAGTGGGTTTAAAGGTAAATAACACTCAGGCACAGTACAT  
CTTTTCAACAGTCAACGCACTCCCTGAGTGTAATGTTGACATAGTTGTTATAGATGAAGTGT  
CTATGTGTACTAATTATGACCTGTCCGTTATTAATCAGCGGTTGTCTTATAAACATATTGTTT  
ATGTGGGTGACCCACAGCAATTACCAGCGCCACGTACCATGATCACTAAAGGCGTTCTCGA  
ACCTAAGGACTATAATGTTGTAACCTCAGAGGATGTGTGCTGTTGGGCCAGATGTCTTCTTGC  
ATAAATGTTACAGATGTCCTGCGGAGATTGTTAAAACAGTCTCAGAGTTGGTTTATGAGAA  
TAAGTTTGTACCTGTTTCATGCTGATAGCAAACAGTGCTTTAAACTGTTTTGTAAGGGTAATG  
TTCAGGTTGACAATGGTTCTAGTATTAACAGAAAGCAATTGGATATCGTTAAGATGTTCCCT  
GCTAAGAATCCACGTTGGTCTAAAGCTGTGTTTATCTCACCTTATAATAGTCAAAATTATGT  
GGCTAGTAGGGTTTTGGGTTTGCAGATTCAGACTGTTGATTCCCTCTCAAGGTAGTGAATATG  
ACTATGTCATATACACACAGACGTCAGACACAGCACATGCTTGCAATGTTAATAGATTTAA  
TGTTGCAATTACAAGAGCCAAGAAGGGTATTCTTTGTGTTATGTGTGATCGGGATTTGTTTG  
ATGCTCTGAAATTTTTCGAGATCAAGCTTTCTGACTTGCAGGCTAGTGGTGATGGCTGTGGT  
CTTTTTAAAGATTGTTACAGGAAAGATGATGAATTACCTCCATCTCATGCAGCTACCTATAT  
GGCCTTGTCTGACAACTTTAAAGGTCAATGGTGATCTTGCTGTGCAGATTGGCTTTAAAGGTG  
TGTGTAAGTATGAGCATGTTATTTCTTTTATGGGCTTCAGGTTTGACATTAATGTGCCTGAAC  
AGCATAGTCTTTTCTGTACCAGGAATTTGCAATGCGCCATGTGCGTGTTGGCTTGGTATG  
GATGTAGAAGGTGCCCATGTTACAGGTGAAAATGTAGGTACTAATGTACCATTACAAGTAG  
GCTTCTCTAATGGTGTTGATTTTGTGTTCCAACCAGAAGGTTGTGTTGTCACTGAGACAGGC  
AGCAGGATCGTACCTGTTAGAGCTCGTGCTCCGCCAGGTGAACAGTTCACACATTTGGTCC  
CCCTGCTTCGTAAGGGACAACCATGGGCTGTGGTTTCGTAAACGCATTGTTTCAAGATGTGTTGC  
GATTACTTGGTGAACCTATCAGACATATTAATCTTTGTTTTGTGGGCTGGTGGTTTGGAGTTG  
ACTACCATGAGATATTTTGTAAAATTGGACCAATCAAAGTTTGTGAGTGCGGCAAAGTGG  
CCACTTGTTACAATAGTGTGACTCTTGCTACTATTGTTTCAAGCATGCCTGAGGGTGTGATT  
ATTTGTACAATCCTTATGTTATTGACATTCAGCAGTGGGATTATACAGGTTCACT

>SUOHC1004

CAGTTTTACAGTTTGTACAACCTTCTTGTGTGAATAGCATTCTTACATCATTACACAGAATT  
ATTGTGCTATGTATGTATATGCTTCTTGTATTTTATGGCCACTCGCAATATGCGTTATGCTTG  
GATTTGGCATAGTGGCTTTGTGCTTGCTATTTTCACTGGCACCATGGTGGCTTATTGTTTG  
GTATGTCTGTGCTACATGTGTTGGGTTGATTCCTAGTCTTATGAACTTAAGGTTTCTACGCA



GCTTTTGGAGGGAGACAAGTTTGTCTGGCACTTTTGGAGAGTGCTGCTGCAGGTACTTTTGTGA  
TTGACATGCATTCTTATCAGCGTCTGGTCAATAGTATTGCACCGGAGAAGCTGAAACAGTA  
TGCTGCCAGTTACAATCGTTATAAGTATTATAGTGGTAGTGCTAGTGAGGCTGACTACCGTC  
TTGCTTGTTTCGCTCACCTTGCAAAGGCTATGTTGGACTATGGTACCAACCATCAAGACATG  
CTCTACACTCCTCCCACAGTTTCGTACAATTCTACATTGCAGTCTGGTCTGCGAAAGATGGC  
TCAACCATCTGGTGTTGTTGAAAAATGTGTGGTTTCGTGTGAGTTATGGTAACATGACATTGA  
ATGGTGTTTGGCTTGGTGACACAGTTATTTGTCTAGACATGTTATTGCGTCATCAACCACTT  
CTACCATTGATTATGAACATGAGGCTTCTATTATGCGTCTTCATAATTTTTCTATTGCTGTTG  
GTAATGTCTTTTTGGGTGTTGTAGGTGTTTCTGTTAGAGGTTGTAATCTTCATATTAAGGTTA  
ACCAATCTAATGTTAACACACCCCAATTATAGCTTTAAACCTTTGAAGGCTGGTGATTCTTTC  
AACATTTTGGCTTGTTATGATGGTGACCTGCTGGTGTTTATGGTGTGACACTGCGCACAAA  
TAACACTGTGCGTGTTTCATTTATCAATGGAGCTTGTGGTTCACCGGGTTACAATATTGTTG  
GAGGTATAGTTGAGTTTTGTTACCTTCATCAGCTTGAACCTGGCAGTGGTGTGATGTTGGT  
CTAATCTTGAAGGTGTTATGTATGGTGGTTTTGAGGATCAACCTACATTGCAAATTGAAGGC  
GCTAGTAATTTAGTTACTGTAAATGTTATTTCTTTACGGTGCACCTTTGAATGGTGTTA  
CATGGTGGCTTACAAGTGAACGTGTCACCATAGATGCTTATAATGAGTGGGCTCAACAAAA  
TGGTTTTACACAGGTAGTTCTGTGGATTGTTTTACCATTCTTGCAGCCAAGACTGGTGTAGA  
CGTACAACGTATTTTAGCGGCTGTACAGCGTTTGCACAAGGGTTTTGGTGGTAAGGCTATCC  
TTGGATTCACTTCTCTTACAGATGAGTTCACCACTGCTGAGGTCATACAGCAAATGTATGGT  
GTCAGTCTACAGAGTGGCAAGGTTTCCAGTACTTTCAAGAATTTGTTTCTTGTGTTGTTACTTTC  
TTTGTTATGCTGTGGTCTGAGTTGATGATGTTACACCATTTTTCTGGGTAGTCCCGGATTT  
GTCACCTCAATTTTTGCTATGCTCGTTTTGCTGTCAATTATGTTTACAGGTTTTATTAAACATA  
AAGTTTTGTACCTTTATACATTTTTGATTCCAGCAGTTATTGTGACGTCTTGTGCAATTTTCT  
TGTTGAGCTTGCAATTAATTCTTGGCTTGCATCTGTTCTTGATTATCATGCCTCTATTATGAGT  
GTTGATATTACAGGTGTGATTAATGTAGTTATTTGTGCTATTGTGACTATATTGCACACGTAC  
AGGTTTGCCAAGGCTGGTTTTGTGACTTATGTTACATATTTTCTGTCTGTTGTTTGTGTTATTT  
ATAATTGGTGGTTTCATGGTGATCTGCTGAGTCTGTTTATGATGTTGCTTCTCAATGTGTCAG  
ATAGCTGGTATGTTGGTGCTATTGCATACAGAATATCATTACTTGCAGCCACACAATTCCCT  
ATGTTGGAACCTGTTGTTGGTAAGGCCAAGGTTGTGATTTTTATTATGTTGCAATTGGTTTTT  
TGTGCTGTATGTATTATGGTGTCTGTATTGGATTAAACAGATTCTGTAAGTTGACACTTGGTG  
TATATGACTTTAAAGTCAGTGCTAATGAGTTTAAAGTATATGGTTGCTAACGGGTTACGTGCT  
CCTAGAGGTGTGTTTGACTCAATGCTTCTGTCTATGAAACTTGTGGTATTGGTGGTGATAA  
AGTTATAAAAGTTTCCACGGTACAATCCAACTGACAGATATTAAGTGCATAATGTTGTTT  
TGCTTGGCTGTTTGTCTAGTATGAACATTGCAGCTAATACTAAAGAATGGGCTCATTGTGTC  
GAATTGCACAACAAGATTAATCTTTGTGATGATCCTGAAAAGGCACAAGAAATGCTTCTTG  
CATTGCTAGCTTTCTTTATTAGCAAGCAAAAAGATTTTGGCATTGATGATTTGATTGATTCAT  
ACTTTGACAGTTCTAGTGTACTGCAGAGTGTTGCGTCTACATTCGTCAATATGCCTTCTTACA  
TCGCTTATGAAAGTGCGCGGCAAAGTTATGAGGATGCTGTTAATAATGGTTCCTCTCCACAG  
CTCATTAAAGCAGCTTAAGCGTGCTATGAATATTGCTAAAGCTGAGTTTGACCATGAGTCTTC  
GGTTCAAAAGAAGATTAATCGCATGGCCGAACAAGCTGCTGCTCAGATGTTCAAGGAAGC  
ACGTGCTGTTAATAGAAAGTCCAAGATTGTTAGTGCTATGCACTCTTTGCTTTTTAGCATGCT  
TCGTGCTTGGACATGTCTAGTGTGGACACTATTCTTAGTCTTGCAAAGATGGTATAGTTC  
CTCTGTCTGGTATTCCCGCCACTTGTGCTACTAAACTTTCTATTGTTAGCAGTGATTTTACGT  
CATTTGCTAAGATTGTTAAAGATGGTGTGTGCACTATGCTGGTGTGGTGTGGTTCGATTGCT  
GAAATCACTGATGCTGATGGTAAGATCGTACATCTTAAGGAGGTTGTCGAAGAGAACACA  
GATTCATTACATGGCCACTCTTTGTTAGTTGCGTGCGTGTTGTGAAGCTTCAGAATAATGA  
GATTATTCCTGGTAAGCTTAAACAGCGTGTGTAAGGCAGAGGGTGATGGTTTCAGTGTTG  
AAGGTAAAGCACTCTTTAATAATGAGGGTGGTAAACCTTTTATGTACGCTTTTGTCTGCTGAC  
AAACCAGATTTGAAATATGTTAAGTGGGAATTTGATGGTGGTTGTAACACTATTGAACTTGA  
GCCACCTTGTAGGTTTGTGTTGAACTGCAAATGGCACTGTTATAAAGTACTTGTATTTTGT  
GCGTAATCTAAACACATTGCGCAGGGGTGCAGTTTTGGGCTTTATTGGTGCTACAGTGCGTT  
TGCAAGCCGGTAAACAAACAGAACTTGCTTCTAATTCGGCATTGCTTACTATGTGTGCTTTT

GCTGTTGATCCTGCCAAGACGTATATTGACGCTGTAAAGAAGGGTGTAAACCTGTCGGGA  
ATTGCGTCAAGATGTTGTCAAATGGTTCAGGTACTGGCCAAGCTATTACTGTTGGTGTGAA  
GCTAATTCTAATCAAGATTCTTATGGTGGCGCTTCTGTCTGTTTGTATTGCCGTGCACATGTT  
GAACATCCTACGATGGATGGTGCCTGTCGTTACAAAGGCAAGTATGTTCAAGTCCCCTTG  
GTAATGCGGATCCTATACGGTTCGTGTTAGAAAATGAGCCATGTAAAGTTTGTATGTGCTGG  
TTGAATAATGGTTGCACTTGTGATAGAACTTCTATTCAGAGTGTGATACGAGTTATTTAAA  
CGAGCACGGGGCTCTAGTGCAGCTCGACTAGAGCCCTGTAATGGAAGTACACGGATCGT  
GTAGTCCGTGCTTTTGACATTTACAATAAGGATGTTGCGTGTATTGGCAAGTTTCTTAAGGTC  
AATTGTGTCCGTTTTAAGAATCTTGACAAGCATGATGCCTTCTTTGTTGTAACGTTGTACG  
AAGTCTGTCATGGAACACGAGCAGTCCATATATGACAAGCTTCACAGTTGTGGTGCAGTTG  
CAGTTCATGATTTTTTCTTGTGGAAAGATGGCCGTTTCTTGTGTAATATTAGCAGGCAA  
AACCTGACTAAGTATACAATGATGGACTTGTGTTATGCTTTGAGAAATTTTGATGAGCGTAA  
TTGTGAAACACTTAAAGAAATCTTGTCTTACTGGTTGCTGTGACTATTCATATTTGAAAA  
TAAGGATTGGTACGACCCAGTTGAAAATGAGGACATTCATAAAGTTTATGCACACCTTGGA  
ACTGTTGTCTCTAATGCATTGCTTAAGTGCGTTAAGCTTTGCGATGCGATGGTAGAGGCAGG  
TGAGTGGGTGTGTTAACACTTGATAACCAAGACCTTAATGGTGATTTTTATGATTTTGGTG  
ACTTTGCTACAACAATACCTAAAATGGGTGTACCATTATGTACCTCTTATTACTCTTATATGA  
TGCCTGTAATGGGTATGACCAATTGTCTTGCATCTGAGTGTGTTTATTAAGAGTGACATTTTGT  
GTAGTGATTTTAAGACCTATGATTTGCTTGAGTACGACTTTACAGAGCACAAAGAGGCTTTG  
TTTCGTAAGTACTTCAAGTATTGGGGTACAGGATTACCACCCTAATTGTGCTGATTGTCACGA  
CGAGCTTTGTATTGTTTATTGTGCGAATTTAATACGTTGTTGCTACGACTATTCCTAATAC  
GGCTTTTGGTCTCTGTGTCGCAAAGTGTTTGTGATGGTGTGCCACTTGTTACTACAGCTGG  
CTACCATTTCAGCAGTTGGGCCTTGTGTTGGAATAAGGATATAAATACTCACTCTACTCGTT  
TGAGTGTAATGAGTTGTTACAGTTTGTACAGACCCTGCACTTTTGATAGCATCATCACCA  
GCCCTTGTGGATCAGCGTACTGTTTGTGTTTTCAGTCGCTGCCTTGAGTACTGGTATGACAAAT  
CAGACAGTTAAGCCAGGCCACTTTAATAAAGAGTTCTACGACTTTTTGAGATCGCAAGGAT  
TTTTTGAAGAAGGCTCTGAATTAACTTTAAAGCATTCTTCTTTGCACAGAAGGGTGATGCT  
GCTGTCAAAGATTTTGACTACTATCGTTATAATAGACCAACTATGCTAGACATTTGTCAGGC  
TAGAGTCACTTATAAAATAGTGCAGCGTTATTTTGTGCTATGAGGGTGGCTGTATTGCCG  
CTAAGGATGTTGTTGTTACTAACCTCAATAAAAGTGAGGTTACCCACTTAATAAATTTGGT  
AAAGCTGGTTTGTATTATGAGTCTCTTAGTTATGAGGAACAAGATGCACTATACGCTCTTAC  
AAAGCGTAATGTGTTACCTACTATGACACAGCTTAACCTTAAATATGCAATCAGTGGTAAA  
GAACGTGCTAGGACTGTTGGTGGTGTTCATTGTTGTCTACTATGACTACTAGACAGTTTCAT  
CAGAAACACCTTAAGTCCATTGTTAATACACGTAATGCATCTGTTGTCATTGGTACCACAAA  
ATTTTATGGTGGTTGGGACAACATGCTTAAGAACCCTTATTGATGGTGTGACAATGCGTGCC  
TTATGGGTTGGGATTACCCTAAGTGTGATCGTGCACCTTCTAATATGATTTCGCATGATTTCTG  
CCATGATTTTGGGTTGCAAGCATGTTACTTGTGCTGATTCTTCTGATAAATATTACCGTCTCT  
GTAATGAGCTCGCTCAAGTGTGACAGAAGTTGTATATTCTAATGGTGGGTTTTATCTCAAG  
CCTGGTGGTACCCTTCTGGCGATGCTACAACGGCTTATGCGAACTCTGTGTTAATATTTTT  
CAAGCTGTTAGCGCCAATATTAACAGGTTGCTTAGCATTGATAGCAATGTGTGTAATAATAT  
TGGTGTTAAGAGTTTGCAGCGTAAGCTATATGATTGTTGTTATAGATCTTCTTCAGTAGATG  
ATTCTTTTGTAGACAGTTATTATTGCTACTTGCAGGAAACATTTTTCTATGATGATTTTGTGAG  
ATGACGGTGTGTTGTTGTTAATAAAGATTATGCTGATTTGGGTTATGTGGCAGATATTAAT  
GCCTTTAAAGCTACCCTATATTATCAGAATAATGTCTTTATGAGTACTGCTAAATGCTGGGT  
GGAGCCAGACATTAGCAAAGGTCCTCATGAGTTCTGTTACAGCATACTATGCAGATTGTA  
GATTCTGACGGCAAGTATTATTTGCCATACCCAGACCCATCTAGAATATTGTCTGCTGGTGT  
ATTTGTGATGATGTTGTTAAGACTGACGCTGTGATATTGTTGGAGCGCTACGTCTCATTTGG  
CAATCGACGCATATCCTTTGTCTAAACATCATAATCCTGAATATAGAAAAGTGTGTTTATACG  
CTTCTAGATTGGGTTAAGCATCTACACAACACACTTAATCAGGGCGTGCTTGAGTCTTTCTC  
CGTTACATTGCTTGAGGATGTATCCTCTAAGTTTGGGATGAGAGTTTTATGCTAGTTTGTGTA  
TGAAAAGTCTACAGCACTTCAAGCCGAGGCCTATGTGTTGTTGTGGTCTCAAACGTGTAC  
TGCGTTGTGGTGATTGTCTTAGACGACCTATGTTGTGCACTAAGTGTGCGTATGACCATGTT

GTCACCACGAATCATAAATTCATTCTGGCTATAACACCTTACGTTTGTAAATGCTTCTGGTTGC  
 ACCGTTAATGATGTGACTAAGTTGTATTTAGGAGGTCTGAGTTACTGGTGTATAGACCATAA  
 ACCTACGCTGTCACTGCCACTTTGTAGTGCAGGTAATGTTTTGGTTTGTATAAAAACTCTGC  
 TACTGGTTCACCGGATGTAGAGGTTTTTAATACTTGGCACGTCAGATTGGACTGACGTTA  
 AAGATTACAAGCTGGCTAATGAATGCAAGGATTCTCTTAGGCTTTTTGCGGCTGAGACTGTT  
 AAAGCCAAAGAAGAGAGTGTTAAATCCTCTTATGCTTGTGCTACACTTAAAGAAGTTGTTG  
 GGCCACGTGAGTTGATTCTTAGCTGGGAGTGCGGAAAAATTAAACCGCCACTTAACCGTAA  
 TTCAGTGTTCACGTGTTCCAGATTTCTAAAGACTCTAAGTTCCAGGTTGGAGAGTTTACGTT  
 TGAAAAATTGGATTACGGTTCTGATGCTGTGTGCTACAAGTCTACCACCACAGTCAAATTA  
 GTGCCTGGTATGATTTTTGTTCTCACATCACACAATGTACAGCCGCTTAGGGCTCCCACTATT  
 GCTAATCAAGAACGCTATGCTTCAATTTATAAACTGCACCCTACTTTTAATATTAGTGATGC  
 TTATGCCAATTTGGTGCCGTACTACCAAATGATTGGCAGACAACGAATCACTACTATTCAA  
 GGCCACCGGGAAGTGGCAAGTCTCATTGTGTTATAGGTCTGGGTCTTTATTACCCAGGTGC  
 TAGGATGGTTTTTGCGGCTTGCTCTCATGCAGCCGTAGATTCACTTTGTGTCAAGGCTGCCA  
 CTGCTTATAGTGTAGACAAATGCACTCGTATTATCCCTGCCCCGTGCTAGGGTTGAGTGTTAT  
 AGTGGGTTTAAAGGTAAATAACACTCAGGCACAGTACATCTTTTCAACAGTCAACGCACTCC  
 CTGAGTGTAAATGTTGACATAGTTGTTATAGATGAAGTGTCTATGTGTACTAATTATGACCTG  
 TCCGTTATTAATCAGCGGTTGTCTTATAAACATATTGTTTATGTGGGTGACCCACAGCAATT  
 ACCAGCGCCACGTACCATGATCACTAAAGGCGTTCTCGAACCTAAGGACTATAATGTTGTA  
 ACTCAGAGGATGTGTGCTGTTGGGCCAGATGTCTTCTTGCATAAATGTTACAGATGTCCTGC  
 GGAGATTGTTAAACAGTCTCAGAGTTGGTTTATGAGAATAAGTTTGTACCTGTTTCATGCTG  
 ATAGCAAACAGTGCTTTAAACTGTTTTGTAAGGGTAATGTTTCAGGTTGACAATGGTTCTAGT  
 ATTAACAGAAAGCAATTGGATATCGTTAAGATGTTCCCTTGCTAAGAATCCACGTTGGTCTA  
 AAGCTGTGTTTATCTCACCTTATAATAGTCAAAATTATGTGGCTAGTAGGGTTTTGGGTTTGC  
 AGATTCAGACTGTTGATTCTCTCAAGGTAGTGAATATGACTATGTCATATACACACAGAC  
 GTCAGACACAGCACATGCTTGCAATGTTAATAGATTTAATGTTGCAATTACAAGAGCCAAG  
 AAGGGTATTCTTTGTGTTATGTGTGATCGGGATTGTTTGATGCTCTGAAATTTTCGAGATC  
 AAGCTTTCTGACTTGCAGGCTAGTGGTGATGGCTGTGGTCTTTTTAAAGATTGTTACAGGAA  
 AGATGATGAATTACCTCCATCTCATGCAGCTACCTATATGGCCTTGCTGACAACTTTAAGG  
 TCAATGGTGATCTTGCTGTGCAGATTGGCTTTAAAGGTGTGTGTAAGTATGAGCATGTTATTT  
 CTTTTATGGGCTTCAGGTTTGACATTAATGTGCCTGAACAGCATAGTCTTTTCTGTACCAGGA  
 ATTTTGCAATGCGCCATGTGCGTGGTTGGCTTGGTATGGATGTAGAAGGTGCCCATGTTACA  
 GGTGAAAATGTAGGTACTAATGTACCATTACAAGTAGGCTTCTCTAATGGTGTGATTTTGT  
 TGTCCAACCAGAAGGTTGTGTTGTCACTGAGACAGGCAGCAGGATCGTACCTGTTAGAGCT  
 CGTGCTCCGCCAGGTGAACAGTTCACACATTTGGTCCCCCTGCTTCGTAAGGGACAACCAT  
 GGGCTGTGGTTCGTAAACGCATTGTTTCAGATGTGTTGCGATTACTTGGTGAACCTATCAGAC  
 ATATTAATCTTTGTTTTGTGGGCTGGTGGTTTGGAGTTGACTACCATGAGATATTTTGTTAAA  
 ATTGACCAATCAAAGTTTGTGAGTGCGGCAAAGTGGCCACTTGTTACAATAGTGTGACTC  
 ATGCATACTATTGTTTCAAGCATGCCTTAGGGTGTGATTATTTGTACAATCCTTATGTTATTG  
 ACATTCAGCAGTGGGATTATACAGGTTCACTTAGCCATAATCATCATGAGCATTGTAATGTA  
 CATCGCAATGAGCATGTTGCATCAGGTGATGCTATTATGACTCGTTGTCTTGCTGTGTATGAT  
 TGCTTCGTCAAGAACGTTGATTGGTCCATTACTTACCCATTCAATGCTAATGAACATGCCATT  
 AATAAGAGTGGTAGAGTTGTGCAATCTATGGTTGTCAAATCAGCTATAAAGTTATATAATC  
 CTAAGTAATTCATGATATTGGTAATCCTAAAGGTATTAGGTGTGCAGTTACTGATGCACAC  
 TGGTTTTGCTATGATAAGCAGCCCCCTCAATCCAATGTCAAGTTGCTTGAGTATGATTATAT  
 AACTCATGGTCAGATGGATGGGTTATGCCTATTTTGGAATTGCAATGTTGATATGTATCCTG  
 AATTTTCTATTGTGTGCCGTTTTGACACTCGTTGTAGGTCAAATCTCAACTAGAAGGTGTTA  
 ATGGAGGTTCACTTATGTCAACAACCATGCATTTTTTACACCTGCATTTGATAAGCGTGCA  
 ATGGCTAAACTTAAGCCTATGCCCTTCTTTTTCTATGATGACACGCCTTGCGATCGTGTTTCAT  
 GATCAAATAAATTATGTACCACTGCGTGCTAGTACTTGATTACAAAGTGTAATATTGGTGG  
 TGCTGTTTGCAGTAAGCATGCCAATATGTTTCATGCCTATGTTAATGCATATAATACTTTCAC  
 GCAGGCTGGTTTTACTATTTGGGTCCCTGTAACCTTTTGATTGTTC AACCTTTGGCAAACATT

TGTCGAAACTAATTTGCAAGGCTTGGAGAACATAGCGTTTAATGTCCTCAAGAAAGGGTCT  
TTTGTGGTGTAGAGGGTGAACCTACCGGTTGCTATCGTTAATGACCGTGTGCTGGTACGTGA  
TGGCACCGTGGATAATTTGATTTTTACTAATAAAACCTCATTACCTACTAATGTTGCTTTTGA  
GCTTTACGCCAAACGTAAAATGGGTTTGACACCACCTCTTGCTGTTCTCAGGAATCTCGGTG  
TTGTTAGTACCTATAAGTTTGTGTTATGGGATTATGAGGCAGAAAGACCATTACTACTTTTA  
CTAAAAATGTTTGCAGTTACACAGACTTTGATGAGGATGTGTGCACTTGCTTTGATAATAGC  
ATTCAGGGTTCGTTTGAACGCTTTTCAATGGCAAACAATGCAGTGCTTATTTCCACATCTGC  
TGTTAAGAAGCTTACTTGTATTAAGCTTAACCTATGGTTTGCTTAATGGTGTGGCTGTTTCTAA  
GACTGGTGACAAGCCTGTTACATGGTATATCTATGTCCGTAAAAATGGTCAATTTGTTGACC  
AATTTGACGGATAATTTACTCAGGGGCGTACTACTATTGATTTCTTACCTCGTAGTGTTATGG  
AGGAAGACTTTTTAAACCTTGATATGGGTTTGTATTAGTAAGTATGGTCTTGAAGACTAT  
GCTTTTGAGCATGTTGTGTATGGTGACGTGTCTGGTACTACACTTGGTGGACTACATTTATTA  
ATTTCTCAAGTACGCCTTGGAAAAATGGGTGTCTTGAAAGTGGATGAGTTCACACATAGTG  
AGGATAGTACATTGAAGTCCTGTACAGTCACCTATTCTAATGATCCTAGTAGTAAATGGTT  
TGTACCTATATGGATTTGTTGCTAGATGATTTTGTACCATTTTAAAAATCTTTGGATTTGGGTG  
TAATTTCCAGAGTTCATGAAGTTGTAGTCGATTGTAAGGTTTGGCGTTGGATGTTGTGGTGT  
AAGGACCACAAAGTTCAAACGTTCTACCCACAGTTGCAGTCGTCAGAATGGAAATGTGGCT  
ATTCCATGCCCTCACTGTATAAAATACAGCGTATGTGTCTTGAGCCCTGTAATTTGTACAAT  
TATGGTGCTAGTCTTAAGCTACCTGAAGGTATCATGTTTAAACGTGGTCAAATACACTCAGTT  
ATGTCAATATTTGAATAGTACTACTATGTGTGTACCGCATAATATGCGTGTACTACATCTTG  
GTGCTGGCTCAGATAAAGGAGTCGCACCTGGTACTGCTGTATTGCGTCGTTGGTTACCCAGT  
GATGCTATTATTGTTGACAATGATGTTAATGACTATGTTAGTGATGCAGATTTCAAGTGAAC  
AGGGGATTGCGCCACTTTGTACTTACAGGATAAGTTCGACTTAGTGGTTTCAGACATGTATG  
ATGGCCGTATTAAACAGTGTGATGGTGTAAACGTTTCAAAGGATGGCTTCTTCCCTTACATC  
AATGGTGTGATATCAGAGAAGCTTTCCCTAGGTGGTACAGTTGCCATTAAGATTACTGAGT  
ATAGCTGGAATAAGCGGCTGTATGAGTTGATACAAAAGTTTGAATTTTGGACGTTGTTTTGT  
ACTAGTGTGAATACATCATCGTCTGAAGCTTTTCTAATTGGTGTCAACTATCTTGGCGACTA  
CGCCACTCAACTCATTGTGGATGGTAATACTATGCACGCTAATTATGTGTTTTGGCGTAATT  
CTACAATTATGTCCATGTCATATAATAGTGTGCTTGATCTAGCAAAGTTTAATTGTAGACAT  
AAAGCTACGGTTGTTATTTCACTTAAAGAAAGTGATTTGAATGATGTTGTGGTAGGCCTTAT  
AAAGAATGGAAAGTTGTTGGTTAGAAAGAGTGGTGTCAATTTGTGACTATGGTAACCATTTA  
GTTTCAACTAAATAA

>SUOHC1005-ON893138

ATGCTGGAACCATAGAGCGTGGGCACTATACAGTGTTTCGATGATGACACTGGACGTGTCCA  
TGATGGCAGTGATTTTGCACCCGGAGACCTTTCCACCATGGCCGTTACTTCGCTCGTTGTGC  
GTAATCGTGCATTTTTGGACCCGGTTGCTCGCGTCGAGCGTAAAGCTACTGAATTTGTGCAG  
ACATTAGATGCAGCTTCTGATCAATTCCTTGCCTTTGGTGATGTTGTGTGCGGGAATGTTATT  
ACAGTGCTTTTGTGGCTTTTTAGTATGCTTAGTATAGTTTTTAAGGCCTTTAAGAGTAAAGAT  
TAAAAGTTTTTGTCTTAGCCCTGAGAGAACTGGTGTTATACTAAGTCGTAGTTTACGCTAT  
AATTTTAAAGCTTGTAAGCACGTTTTTAAAGCTTAAAGATGCGTTGGGTCACATTGTTTTTCAA  
TTTTTAGTTCTGCTGTACACATTGTATGCAGTAGGTTTCTTGTGTGTACGGTTTGGTCCTGTTA  
ACGGTTATGTCTGTGGTGACTACGTTTGGGTTATGCAGAATCAAACCTCGATAAGAATTCA  
TATTGCAATTCTCCGCTGTGTAAAGTGTGCTTGTATGGCTACCAGGAATTGAGTGACTTTCCT  
CATACTAACACTGTTTGGGAGCATATTAAAGACCCACTTATTGGGAATGTTATGCCCTTGCT  
TACTTAGTCTTTCTAGCAATTTTTGGTGGTCTTCCGATGAGAATTATTGTGTGCTATTTTGT  
GCACAGTATGTAAACTTTTTTGGTAGCAAATTTGGTGTTCAGACAATGTTTGGCTTCTACA  
GGTCATTCCATTCTCAGTGTTTGGTGATGAAATTGTGGTTTGTTCATTGTTTTTAAAGCACTT  
TGCTTTTTGCGACATGTCCTCTTAGGCTGTGATAAAGCTTCTGTGTTGCTTGTGTAAAAGT  
GCGCGTCTTCGTCGTGTACCTATGCAGACTATTGTGAATGGAGCTTCAAATCATTTTATGTT  
ATGGCTAATGGCGGTAAGAGTTTTTGTAAAGACATAACTTCTTCTGTCTTAGTTGTGACTCT  
TATGGTCTGGTAATACTTTTATTAATGAGGTAATTGCCAAGGAAGTGCCAATGTGACTAA  
AACTAATGTTCAACCTACCGGTACAGCTTGTGTAGACATTGATAAGGTTGAGTTTTCTAATG

GGTTTTACTATTTGTATAGTGGTGAGACATTTTGGAAATACAATTTTGACATTACTGAAGCT  
AAATATAGCTGTAAAGATGTCCTTAAGAATTGTAACATTGTGTCTGATTTTATTGTTTACAAT  
AATGTTGGTAGTAATGTGACACAGGTTTCGTAATGCTTGTGTTTACTTATCTCAACTTTTGTGT  
AAACCTATTAACTTGTAGACTCAGCTCTCCTTGCCACGTTGAACGTAGACTTTAATGGTGC  
TCTGCATGCAGCTTTTGTGGAAGTGCTTAATGACAGTTTTTCTAAGGACTTGTCTGGGTTGCAC  
TACTATGGCTGAGTGTAAGCAGGCACTAGGTATTGATGTTAGTGATGATGATTTTGTTAATG  
CTGTTAGTAACGCACACCGTTTTAACGTGTTGCTTACAGATGTTTCATTTAACAATTTTGTCA  
CATCCTATGCCAAACCAGAGGAGAAGTTGTCTACTCATGATCTTGCGACTTGTATGCGTGCT  
GGTGCTAAGGTTGTCAATCATAATGTTCTCGTAAAAGAGAATATGCCTGTTGTGTGGGCTGC  
TAGAGAATTTAACTTTTTATCTGAAGAATGTCGTAAGTATTTGATTAAGACGTCAAAAAGCTA  
AGGGCGTCAATTTTCATGCTTACATTTAACGACAATAAGATGCAAACACACGTCCCCGTTGT  
TAGCATTATAGCTAAGCAAGGGGCTGGTGTTTTGCCCACTTGTTACAAATTTTGTGGTGGTT  
GTGTTTCTTTGTTGTTGTTGTGTTCTTTAGTACTGGTTTATTGTCCTTTGAGCAACAGGTTACT  
AGTGAGACTGATTTTGACTIONTAAAGTACATTGAGAATGGTGTGCTTAAAGTGTTCACAGAATC  
CTTGATTGTGTGCATAATGCTTCGACAATTTTGTTACATGGCATGACGCAAAATTCGGTT  
CGGTGCCAAGGGTTGATGCCAGGTGTCCTATTGTCGTAGGTGTATCTGATGATGTGCGTATG  
ATTCTGGTATTGCCGCTGGTGTAAAGCTCGTTGGTAAGACATTGGTTTTTGCACTTCAATCT  
GTGTTTGGTGATTCTGGTTTATGTTATGACCTTAATGGTTTGACAACCACTGCTAGTTGTGTTT  
TTAATTCGGCTTGTACTATTCTTAGTGGCGTTGGAGGTAAACACACCTATTGTTACAAGGAT  
GGTCTTGTGTCTGATTCAAAGTTGTATTCTGATATCTTGCCCTAATAGTCATTATAAACTTGAA  
GATGGCAATTATATTAAATTGCCAGAAGTCTTGACTAGGGGTTTGGCTTCAGAACAATTCG  
CACCATTGAAACCACATATTGCCGTATGGGTCAGTGTATTGATTCTAGAGCTGGTGTGTGTT  
TTGGTGTAGACCGTTTCTTTGTATACAGTGCTGAAACTGGTCCAGATTTTATCTGTGGTACAG  
GCCTCATTTCACTGTTGTATAATATCTTTAACATTTTTTCAGGTTCTTTCAGTGTGATGGCTTT  
GTCTGGTCAAATCATTTTTAATTTAGTTGTAGCAACTTTAGTGGTGTTAGCTGTTTTATGGTT  
ACCAAATTCAAACGTGTCTTTGGTGACCTTTCTTTTGCACTTTTACAGTTTGTACAACCTTCT  
TGTGTGAATAGCATTCTTACATCATTACACAGAATTATTGTGCTATGTATGTATATGCTTTC  
TTGTATTTTATGGCCACTCGCAATATGCGTTATGCTTGGATTGGCATAAGTGGCTTTGTGCTT  
GCCTATTTCACTGGCACCATGGTGGCTTATTGTTTGGTATGTCTGTGCTACATGTGTTGGG  
TTGATTCTAGTCTTATGAACTTAAGGTTTCTACGCAGCTTTTTGAGGGAGACAAGTTTGTG  
GGCACTTTTGAGAGTGCTGCTGCAGGTACTTTTGTGATTGACATGCATTCTTATCAGCGTCTG  
GTCAATAGTATTGCACCGGAGAAGCTGAAACAGTATGCTGCCAGTTACAATCGTTATAAGT  
ACTATAGTGGTAGTGCTAGTGAGGCTGACTACCGTCTTGCTTGTTCGCTCACCTTGCAAAG  
GCTATGTTGGACTATGGTACCAACCATCAAGACATGCTCTACACTCCTCCACAGTTTCGTA  
CAATTCTACATTGCAGTCTGGTCTGCGAAAGATGGCTCAACCATCTGGTGTGTTGAAAAAT  
GTGTGGTTCGTGTGAGTTATGGTAACATGACATTGAATGGTGTGTTGGCTTGGTGACACAGTT  
ATTTGTCCTAGACATGTTATTGCGTCATCAACCACTTCTACCATTGATTATGAACATGAGGC  
TTCTATTATGCGTCTTCATAATTTTTCTATTGCTGTTGGTAATGTCTTTTGGGTGTTGTAGGT  
GTTTCTGTTAGAGGTTGTAATCTTCATATTAAGGTTAACCAATCTAATGTTAACACACCCAA  
TTATAGCTTTAAACTTTGAAGGCTGGTGATTCTTTCAACATTTTGGCTTGTATGATGGTGT  
ACCTGCTGGTGTATATGGTGTGACACTGCGCACAATAAACACTGTGCGTGGTTCATTTATCA  
ATGGAGCTTGTGGTTCACCGGGTTACAATATTGTTGGAGGTATAGTTGAGTTTTGTTACCTTC  
ATCAGCTTGAACCTGGCAGTGGTTGTCATGTTGGTTCTAATCTTGAAGGTGTTATGTATGGTG  
GTTTTGAGGATCAACCTACATTGCAAATTGAAGGCGCTAGTAATTTAGTTACTGTAAATGTT  
ATTTGTTTTCTTTACGGTGCACCTTTGAATGGTGTACATGGTGGCTTACAAGTGAACGTGTC  
ACCATAGATGCTTATAATGAGTGGGCTCAACAAAATGGTTTTACACAGGTTAGTTCTGTGG  
ATTGTTTTACCATCTTGCAGCCAAGACTGGTGTAGACGTACAACGTATTTTAGCGGCTGTA  
CAGCGTTTGCACAAGGGTTTTGGTGGTAAGGCTATCCTTGGATTCACTTCTTACAGATGA  
GTTCAACCACTGCTGAGGTCATACAGCAAATGTATGGTGTGAGTCTACAGAGTGGCAAGGTT  
TCCAGTACTTTCAAGAATTTGTTTCTTGTGGTACTTTCTTTGTTATGCTGTGGTCTGAGTTGA  
TGATGTTACACCAATTTTTCTGGGTTAGTCCCGGATTTGTCACTCCAATTTTTGCTATGCTCGT  
TTTGCTGTCAATTATGTTTACAGGTTTTATTAAACATAAAGTTTTGTACCTTTATACATTTTTG

ATTCCAGCAGTTATTGTGACGTCTTGTTGCAATTTTCTTGTTGAGCTTGCAATTAATTCTTGGC  
TTGCATCTGTTCTTGATTATCATGCCTCTATTATGAGTGTTGATATTACAGGGTGTGATTAATG  
TAGTTATTTGTGCTATTGTGACTAATTGCACACGTACAGGTTTGCCAAGGCTGGTTTTGTGA  
CTTATGTTACATAATTTCTGTCGTTGTTTGTGGTATTTTATAATTGGTGGTTTCATGGTGATCT  
GCTGAGTCTGTTTATGATGTTGCTTCTCAATGTGTGATAGCTGGTATGTTGGTGCTATTGC  
ATACAGAATATCATTACTTGCAGCCACACAATCCCTATGTTGGAACCTGTTGTTGGTAAGG  
CCAAGGTTGTGATTTTTATTATGTTGCAATTGGTTTTTGTGCTGTATGTATTATGGTGTCT  
GTATTGGATTAACAGATTCTGTAAGTTGACACTTGGTGTATATGACTTTAAAGTCAGTGCTA  
ATGAGTTTAAAGTATATGGTTGCTAACGGGTTACGTGCTCCTAGAGGTGTGTTGACTCAATG  
CTTCTGTCTATGAACTTGTTGGTATTGGTGGTGATAAAGTTATAAAAGTTTCCACGGTACA  
ATCCAAACTGACAGATATTAAGTGCATAATGTTGTTTTGCTTGGCTGTTTGTCTAGTATGA  
ACATTGCAGCTAATACTAAAGAATGGGCTCATTGTGTGCAATTGCACAACAAGATTAATCT  
TTGTGATGATCCTGAAAAGGCACAAGAAATGCTTCTTGCAATTGCTAGCTTTCTTTATTAGCA  
AGCAAAAAGATTTTGGCATTGATGATTTGATTGATTACACTTTGACAGTTCTAGTGTACTG  
CAGAGTGTGCGTCTACATTCGTCAATATGCCTTCTTACATCGCTTATGAAAGTGCGCGGCA  
AAGTTATGAGGATGCTGTTAATAATGGTTCCTCTCCACAGCTCATTAAAGCAGCTTAAGCGTG  
CTATGAATATTGCTAAAGCTGAGTTTGACCATGAGTCTTCGGTTCAAAGAAGATTAATCGC  
ATGGCCGAACAAGCTGCTGCTCAGATGTTCAAGGAAGCACGTGCTGTTAATAGAAAGTCCA  
AGATTATTAGTGTATGCACTCTTTGCTTTTTAGCATGCTTCGTCGCTTGGACATGTCTAGTG  
TGGACACTATTCTTAGTCTTGCAAAAGATGGTATAGTTCCTCTGTGCGGTGATTCCCGCCACTT  
GTGCTACTAACTTTCTATTGTTAGCAGTGATTTACGTCAATTGCTAAGATTGTTAAAGATG  
GTTGTGTGCACTATGCTGGTGTGGTGTGGTCGATTGCTGAAATCACTGATGCTGATGGTAAG  
ATCGTACATCTTAAGGAGGTTGTGCAAGAGAACACAGATTCATTACATGGCCACTCTTTGT  
TAGTTGCGTGCGTGTGTGAAGCTTCAGAATAATGAGATTATTCCTGGTAAGCTTAAACAGC  
GTGTTGTAAAGGCAGAGGGTGATGGTTTCAGTGTTGAAGGTAAAGCACTCTTAATAATGA  
GGGTGGTAAACTTTTTATGTACGCTTTTGTGCTGACAAACCAGATTTGAAATATGTTAAGT  
GGGAATTTGATGGTGGTTGTAACACTATTGAACTTGAGCCACCTTGTAAGGTTTGCTGTTGAA  
ACTGCAAATGGCACTGTTATAAAGTACTTGTATTTTGTGCGTAATCTAAACACATTGCGCAG  
GGGTGCAGTTTTGGGCTTTATTGGTGCTACAGTGCGTTTGCAAGCCGGTAAACAAACAGAA  
CTTGCTTCTAATTCGGCATTGCTTACTATGTGTGCTTTTGCTGTTGATCCTGCCAAGACGTAT  
ATTGACGCTGTTAAGAAGGGTGTTAAACCTGTGCGGAATTGCGTCAAGATGTTGTCAAATG  
GTTCAGGTACTGGCCAAGCTATTACTGTTGGTGTGTAAGCTAATTCTAATCAAGATTCTTAT  
GGTGGCGCTTCTGTCTGTTTGTATTGCCGTGCACATGTTGAACATCCTACGATGGATGGTGC  
GTGTCGTTACAAAGGCAAGTATGTTCAAGTCCCACTTGGTAATGCGGATCCTATACGGTTCT  
GTTTAGAAAATGAGCCATGTAAAGTTTGTATGTGCTGGTTGAATAATGGTTGCACTTGTGAT  
AGAACTTCTATTACAGAGTGTGATACGAGTTATTTAAACGAGCACGGGGCTCTAGTGCAGC  
TCGACTAGAGCCCTGTAATGGAAGTACACGGATCGTGTAGTCCGTGCTTTTGACATTTACA  
ATAAGGATGTTGCGTGTATTGGCAAGTTTCTTAAGGTCAATTGTGTCCGTTTTAAGAATCTTG  
ACAAGCATGATGCCTTCTTTGTTGTAAACGTTGTACGAAGTCTGTGATGGAACACGAGCA  
GTCCATATATGACAAGCTTCACAGTTGTGGTGCAGTTGCAGTTGATGTTTTTCTTGTGGAA  
AGATGGCCGTTCAAGTTTTTGGTAATATTAGCAGGCAAAACCTGACTAAGTATACAATGATG  
GACTTGTGTTATGCTTTGAGAAATTTTGTGATGAGCGTAATTGTGAAACACTTAAAGAAATTCT  
TGTCTTACTGGTTGCTGTGACTATTTCATATTTTGAATAAAGGATTGGTACGACCCAGTTG  
AAAATGAGGACATTCATAAAGTTTATGCACACCTTGAAGTGTGCTCTAATGCATTGCTT  
AAGTGCGTTAAGCTTTGCGATGCGATGGTAGAGGCAGGTGTAGTGGGTGTGTTAACACTTG  
ATAACCAAGACCTTAATGGTGATTTTTATGATTTTGGTGACTTTGCTACACAATACCTAAA  
ATGGGTGTACCATATGTACCTCTTATTACTCTTATATGATGCCTGTAATGGGTATGACCAAT  
TGTCTTGCACTCTGAGTGTTTTATTAAGAGTGACATTTTGGTAGTGATTTTAAGACCTATGAT  
TTGCTTGAGTACGACTTTACAGAGCACAAAGAGGCTTTGTTTCGTAAGTACTTCAAGTATTG  
GGGTCAGGATTACCACCCTAATTGTGCTGATTGTCACGACGAGCTTTGTATTGTTCAATTGTG  
CGAATTTTAATACGTTGTTGCTACGACTATTCCTAATACGGCTTTTGGTCTCTGTGTGCGCA  
AAGTGTGTTGTTGATGGTGTGCCACTTGTTACTACAGCTGGCTACCATTTCAGCAGTTGGGC

CTTGTTTGAATAAGGATATAAATACTCACTCTACTCGTTTGAGTGTAATGAGTTGTTACA  
 GTTTGTCACAGACCCCTGCACTTTTGATAGCATCATCACCAGCCCTTGTGGATCAGCGTACTG  
 TTTGTTTTTCAGTCGCTGCCTTGAGTACTGGTATGACAAATCAGACAGTTAAGCCAGGCCAC  
 TTTAATAAAGAGTTCTACGACTTTTTGAGATCGCAAGGATTTTTGAAGAAGGCTCTGAATT  
 AACTTTAAAGCATTTCTTCTTTGCACAGAAGGGTGATGCTGCTGTCAAAGATTTTGACTACT  
 ATCGTTATAATAGACCAACTATGCTAGACATTTGTCAGGCTAGAGTCACTTATAAAATAGT  
 GCAGCGTTATTTTGAGTGCTATGAGGGTGGCTGTATTGCCGCTAAGGATGTTGTTGTTACTA  
 ACCTCAATAAAAGTGCAGGTTACCCACTTAATAAATTTGGTAAAGCTGGTTTGTATTATGAG  
 TCTCTTAGTTATGAGGAACAAGATGCACTATACGCTCTTACAAAGCGTAATGTGTTACCTAC  
 TATGACACAGCTTAACCTTAAATATGCAATCAGTGGTAAAGAACGTGCTAGGACTGTTGGT  
 GGTGTTTCATTGTTGTCTACTATGACTACTAGACAGTTTCATCAGAAACACCTTAAGTCCATT  
 GTTAATACACGTAATGCATCTGTTGTCATTGGTACCACAAAATTTTATGGTGGTTGGGACAA  
 CATGCTTAAGAACCTTATTGATGGTGTGACAATGCGTGCCTTATGGGTTGGGATTACCCTA  
 AGTGTGATCGTGCACCTTCTAATATGATTTCGCATGATTTCTGCCATGATTTTGGGTTTCAAGC  
 ATGTTACTTGCTGTGATTCTTCTGATAAAATATTACCGTCTCTGTAATGAGCTCGCTCAAGTGT  
 TGACAGAAGTTGTATATTCTAATGGTGGGTTTTATCTCAAGCCTGGTGGTACCCTTCTGGC  
 GATGCTACAACGGCTTATGCGAACTCTGTGTTTAAATTTTTCAAGCTGTTAGCGCCAATATT  
 AACAGGTTGCTTAGCATTGATAGCAATGTGTGTAATAATATTGGTGTAAAGAGTTTGCAGCG  
 TAAGCTATATGATTGTTGTTATAGATCTTCTTCAGTAGATGATTCTTTTGTAGACAGTTATTA  
 TTGCTACTTGCGGAAACATTTTTCTATGATGATTTTGTGATGACGGTGTGTTGTGTTATAA  
 TAAAGATTATGCTGATTTGGGTTATGTGGCAGATATTAATGCCTTTAAAGCTACCCTATATT  
 ATCAGAATAATGTCTTTATGAGTACTGCTAAATGCTGGGTGGAGCCAGACATTAGCAAAGG  
 TCCTCATGAGTTCTGTTACAGCATACTATGCAGATTGTAGATTCTGACGGCAAGTATTATTT  
 GCCATACCCAGACCCATCTAGAATATTGTCTGCTGGTGTATTTGTGATGATGTTGTTAAGA  
 CTGACGCTGTGATATTGTTGGAGCGCTACGTCTCATTGGCAATCGACGCATATCCTTTGTCT  
 AAACATCATAATCCTGAATATAGAAAAGTGTTTTATACGCTTCTAGATTGGGTTAAGCATCT  
 ACACAACACACTTAATCAGGGCGTGCTTGAGTCTTTCTCCGTTACATTGCTTGAGGATGTAT  
 CCTCTAAGTTTGGGATGAGAGTTTTTATGCTAGTTTGTATGAAAAGTCTACAGCACTTCAA  
 GCCGCAGGCCTATGTGTTGTTTGTGGTCTCAAACCTGACTGCGTTGTGGTGATTGTCTTAGA  
 CGACCTATGTTGTGCTAAGTGTGCGTATGACCATGTTGTCACCACGAATCATAAATTCAT  
 TCTGGCTATAACACCTTACGTTTGTAAATGCTTCTGGTTGCACCGTTAATGATGTGACTAAGTT  
 GTATTTAGGAGGTCTGAGTTACTGGTGTATAGACCATAAACCTACGCTGTCCTGCCCCTTT  
 GTAGTGCAGGTAATGTTTTTGGTTTGTATAAAAACCTCTGCTACTGGTTCACCGGATGTAGAG  
 GTTTTTAATACACTTGCCACGTCAGATTGGACTGACGTTAAAGATTACAAGCTGGCTAATGA  
 ATGCAAGGATTCTCTTAGGCTTTTTGCGGCTGAGACTGTTAAAGCCAAAGAAGAGAGTGTT  
 AAATCCTCTTATGCTTGTGCTACACTTAAAGAAGTTGTTGGGCCACGTGAGTTGATTCTTAG  
 CTGGGAGTGCGGAAAAATTAAACCGCCACTTAACCGTAATTCAGTGTTTACGTGTTTCCAG  
 ATTTCTAAAGACTCTAAGTTCAGGTTGGAGAGTTACGTTTGAAAAATTGGATTACGGTTC  
 TGATGCTGTGTGCTACAAGTCTACCACCACAGTCAAATTAGTGCTGGTATGATTTTTGTCT  
 CACATCACACAATGTACAGCCGCTTAGGGCTCCCACTATTGCTAATCAAGAACGCTATGCT  
 TCAATTTATAAACTGCACCCTACTTTTAAATATTAGTGATGCTTATGCCAATTTGGTGGCGTAC  
 TACCAAATGATTGGCAGACAACGAATCACTACTATTCAAGGCCACCGGGAAGTGGCAAG  
 TCTCATTGTGTTATAGGTCTGGGTCTTTATTACCCAGGTGCTAGGATGGTTTTTTCGGGCTTGC  
 TCTCATGCAGCCGTAGATTCACTTTGTGTCAAGGCTGCCACTGCTTATAGTGTAGACAAATG  
 CACTCGTATTATCCCTGCCCCGTGCTAGGGTTGAGTGTTATAGTGGGTTTAAAGTAAATAACA  
 CTCAGGCACAGTACATCTTTCAACAGTCAACGCACTCCCTGAGTGTAATGTTGACATAGTT  
 GTTATAGATGAAGTGTCTATGTGTAATAATTGACCTGTCCGTTATTAATCAGCGGTTGTCT  
 TATAAACATATTGTTTATGTGGGTGACCCACAGCAATTACCAGCGCCACGTACCATGATCA  
 CTAAAGGCGTTCTCGAACCTAAGGACTATAATGTTGTAACCTCAGAGGATGTGTGCTGTGG  
 GCCAGATGTCTTCTTGATAAATGTTACAGATGTCCTGCGGAGATTGTTAAAACAGTCTCAG  
 AGTTGGTTTATGAGAATAAGTTTGTACCTGTTTCATGCTGATAGCAAACAGTGCTTTAAACTG  
 TTTTGTAAGGGTAATGTTTCAGGTTGACAATGGTTCTAGTATTAACAGAAAGCAATTGGATAT

CGTTAAGATGTTCTTGCTAAGAATCCACGTTGGTCTAAAGCTGTGTTTATCTCACCTTATAA  
TAGTCAAAATTATGTGGCTAGTAGGGTTTTGGGTTTGCAGATTCAGACTGTTGATTCTCTCA  
AGGTAGTGAATATGACTATGTCATATACACACAGACGTCAGACACAGCACATGCTTGCAAT  
GTTAATAGATTTAATGTTGCAATTACAAGAGCCAAGAAGGGTATTCTTTGTGTTATGTGTGA  
TCGGGATTTGTTTGATGCTCTGAAATTTTTCGAGATCAAGCTTTCTGACTTGCAGGCTAGTGG  
TGATGGCTGTGGTCTTTTTAAAGATTGTTACAGGAAAAGATGATGAATTACCTCCATCTCATG  
CAGCTACCTATATGGCCTTGCTGACAACCTTAAAGGTCAATGGTGATCTTGCTGTGCAGATT  
GGCTTTAAAGGTGTGTGTAAGTATGAGCATGTTATTTCTTTTATGGGCTTCAGGTTTGACATT  
AATGTGCCTGAACAGCATAGTCTTTTCTGTACCAGGAATTTTGCAATGCGCCATGTGCGTGG  
TTGGCTTGGTATGGATGTAGAAGGTGCCCATGTTACAGGTGAAAATGTAGGTACTAATGTA  
CCATTACAAGTAGGCTTCTCTAATGGTGTGATTTTGTGTCCAACCAGAAGGTTGTGTTGTC  
ACTGAGACAGGCAGCAGGATCGTACCTGTTAGAGCTCGTGCTCCGCCAGGTGAACAGTTCA  
CACATTTGGTCCCCCTGCTTCGTAAAGGGACAACCATGGGCTGTGGTTCGTAAACGCATTGTT  
CAGATGTGTTGCGATTACTTGGTGAACCTATCAGACATATTAATCTTTGTTTTGTGGGCTGGT  
GGTTTGGAGTTGACTACCATGAGATATTTTGTAAAAATTGGACCAATCAAAGTTTGTGAGTG  
CGGCAAAGTGGCCACTTGTTACAATAGTGTGACTCATGCATACTATTGTTTCAAGCATGCCT  
TAGGGTGTGATTATTTGTACAATCCTTATGTTATTGACATTCAGCAGTGGGATTATACAGGTT  
CACTTAGCCATAATCATCATGAGCATTGTAATGTACATCGCAATGAGCATGTTGCATCAGGT  
GATGCTATTATGACTCGTTGTCTTGCTGTGTATGATTGCTTCGTCAAGAACGTTGATTGGTCC  
ATTACTTACCCATTCATTGCTAATGAACATGCCATTAATAAGAGTGGTAGAGTTGTACAATC  
TATGGTTGTCAAATCAGCTATAAAGTTATATAATCCTAAAGTAATTCATGATATTGGTAATC  
CTAAAGGTATTAGGTGTGCAGTTACTGATGCACACTGGTTTTGCTATGATAAGCAGCCCCCTC  
AATCCAATGTCAAGTTGCTTGAGTATGATTATATAACTCATGGTCAGATGGATGGGTTATG  
CCTATTTTGGAAATTGCAATGTTGACATGTATCCTGAATTTTCTATTGTGTGCCGTTTTGACAC  
TCGTTGTAGGTCAAATCTCAACTTAGAAGGTGTTAATGGAGGTTCACTTTATGTCAACAACC  
ATGCATTTTTTACACCTGCATTTGATAAGCGTGCAATGGCTAAACTTAAGCCTATGCCCTTCT  
TTTTCTATGATGACACGCCTTGCGATCGTGTTTCATGATCAAATAAATTATGTACCACTGCGT  
GCTAGTACTTGTATTACAAAGTGTAATATTGGTGGTGCTGTTTGCAGTAAGCATGCCAATAT  
GTTTCATGCCTATGTTAATGCATATAATACTTTCACGCAGGCTGGTTTTACTATTTGGGTTCC  
TGTAACTTTTGATTTGTTCAACCTTTGGCAAACATTTGTGAAACTAATTTGCAAGGCTTGA  
GAACATAGCGTTTAATGTCCTCAAGAAAGGGTCTTTTGTGTTGGTGTAGAGGGTGAACCTACCG  
GTTGCTATCGTTAATGACCGTGTGCTGGTACGTGATGGCACCGTGGATAAATTTGATTTTTACT  
AATAAAACCTCATTACCTACTAATGTTGCTTTTGAAGCTTTACGCCAAACGTAAAATGGGTTT  
GACACCACCTCTTGCTGTTCTCAGGAATCTCGGTGTTGTTAGTACCTATAAGTTTGTGTTATG  
GGATTATGAGGCAGAAAGACCATTTACTACTTTTACTAAAAATGTTTGCAGTTACACAGAC  
TTTGATGAGGATGTGTGCACTTGCTTTGATAAATAGCATTACAGGTTTCGTTTGAACGCTTTTCA  
ATGGCAAACAATGCAGTGCTTATTTCCACATCTGCTGTTAAGAAGCTTACTTGTATTAAGCT  
TAACTATGGTTTGTCTAATGGTGTGGCTGTTTCTAAGACTGGTGACAAGCCTGTTACATGGT  
ATATCTATGTCCGTAAAAATGGTCAATTTGTTGACCAATTTGACGGATATTTTACTCAGGGG  
CGTACTACTATTGATTTCTTACCTCGTAGTGTTATGGAGGAAGACTTTTTAAACCTTGATATG  
GGTTTGTATTATTAGTAAGTATGGTCTTGAAGACTATGCTTTTGAAGCATGTTGTGTATGGTGAC  
GTGTCTGGTACTACACTTGGTGGACTACATTTATTAATTTCTCAAGTACGCCTTGAAAAAT  
GGGTGTCTTGAAAGTGGATGAGTTCACACATAGTGAGGATAGTACATTGAAGTCCTGTACA  
GTCACCTATTCTAATGATCCTAGTAGTAAAATGGTTTGTACCTATATGGATTTGTTGCTAGAT  
GATTTTGTACCATTTTAAAATCTTTGGATTGGGTGTAATTTCCAGAGTTCATGAAGTTGTA  
GTCGATTGTAAGGTTTGGCGTTGGATGTTGTGGTGTAAAGGACCACAAAGTTCAAACGTTCTA  
CCCACAGTTGCAGTCGTCAGAAATGGAAATGTGGCTATTCCATGCCCTCACTGTATAAAATA  
CAGCGTATGTGCTTGAGCCCTGTAATTTGTACAATTATGGTGCTAGTCTTAAGCTACCTGA  
AGGTATCATGTTTAAACGTGGTCAAATACACTCAGTTATGTCAATATTTGAATAGTACTACTA  
TGTGTGTACCGCATAATATGCGTGTACTACATCTTGGTGTGGCTCAGATAAAGGAGTCGCA  
CCTGGTACTGCTGTATTGCGTCGTTGGTTACCCAGTGATGCTATTATTGTTGACAATGATGTT  
AATGACTATGTTAGTGATGCAGATTTCAGTGTAACAGGGGATTGCGCCACTTTGTACTTACA



>SUOHC1012

>SUOHC1013

25

GATCTGCTGAGTCTGTTTATGATGTTGCTTCTCAATGTGTCAGATAGCTGGTATGTTGGTGCT  
 ATTGCATACAGAATATCATTACTTGCAGCCACACAATTCCCTATGTTGGAACCTGTTGTTGG  
 TAAGGCCAAGGTTGTGATTTTTATTTATGTTGCAATTGGTTTTTTGTGCTGTATGTATTATGGT  
 GTTCTGTATTGGATTAACAGATTCTGTAAGTTGACACTTGGTGTATATGACTTTAAAGTCAGT  
 GCTAATGAGTTTAAAGTATATGGTTGCTAACGGGTACGTGCTCCTAGAGGTGTGTTTGACTC  
 AATGCTTCTGTCTATGAACTTGTGGTATTGGTGGTGATAAAGTTATAAAAGTTTCCACGG  
 TACAATCCAAACTGACAGATATCAAGTGCACTAATGTTGTTTTGCTTGGCTGTTTGTCTAGT  
 ATGAACATTGCAGCTAATACTAAAGAATGGGCTCATTGTGTGCAATTGCACAACAAGATTA  
 ATCTTTGTGATGATCCTGAAAAGGCACAAGAAATGCTTCTTGCAATTGCTAGCTTTTTTTATTA  
 GTAAGCAAAAAGATTTTGGCATTGATGATTTGATTGATTACACTTTGACAGTTCTAGTGTA  
 CTGCAGAGTGTTGCGTCTACATTCGTCAATATGCCTTCTTACATTGCTTATGAAAGTGCGCG  
 GCAAAGTTATGAGGATGCTGTTAATAATGGGTCCTCTCCACAGCTCATTAAAGCAGCTTAAG  
 CGTGCTATGAATATTGCTAAAGCTGAGTTTGACCATGAGTCTTCGGTTCAAAAGAAGATTA  
 ATCGCATGGCCGAACAAGCTGCTGCTCAGATGTTCAAGGAAGCACGTGCTGTTAATAGAAA  
 GTCCAAGATTATTAGTGCTATGCACTCTTTGCTTTTTAGCATGCTTCGTGCGTTGGACATGTC  
 TAGTGTAGACACTATTCTTAGTCTTGCAAAAGATGGTATAGTTCCTCTGTGCGGTGATCCCCG  
 CCACTTGTGCTACTAACTTTCTATTGTTAGCAGTGATTTTACGTCACTTTGCTAAGATTGTTA  
 AAGATGGTTGTGTGCACTATGCTGGTGTGGTGTGGTCGATTGCTGAAATCACTGATGCTGAT  
 GGTAAGATCGTACATCTTAAGGAGGTTGTGCAAGAGAACACAGATTCATTACATGGCCAC  
 TCTTTGTTAGTTGCGTGCGTGTTGTGAAGCTTCAGAATAATGAGATTATTCCTGGTAAGCTTA  
 AACAGCGTGTTGTAAAGGCAGAGGGTGATGGTTTCAGTGTTGAAGGTAAAGCACTCTTTAA  
 TAATGAGGGTGGTAAAACTTTTATGTACGCTTTTGTGCTGACAAACCAGATTTGAAATATG  
 TTAAGTGGAATTTGATGGTGGTTGTAACACTATTGAACCTTGAGCCACCTTGTAGGTTTGCT  
 GTTGAAACTGCAAATGGCACTGTTATAAAGTACTTGTATTTTGTGCGTAATCTAAATACATT  
 GCGCAGGGGTGCAGTTTGGGCTTTATTGGTGCTACAGTGCGTTTGCAAGCCGGTAAACAA  
 ACAGAACTTGCTTCTAATTCGGCATTGCTTACTATGTGTGCTTTTGTGTTGATCCTGCAAAG  
 ACGTATATTGACGCCGTTAAGAAGGGTGTTAAACCTGTTGGGAATTGCGTCAAGATGTTGTC  
 AAATGGTTCAGGTACTGGCCAAGCTATTACTGTTGGTGTGTAAGCTAATTCTAATCAAGATT  
 CTTATGGTGGCGCTTCTGTCTGTTTGTATTGCCGTGCACATGTTGAACATCCTACGATGGATG  
 GTGCGTGTCGTTACAAAGGCAAGTATGTTCAAGTCCCACTTGGTAATGCGGATCCTATACG  
 GTTCTGTTTAGAAAAATGAGCCATGTAAAGTTTGTATGTGCTGGTTGAATAATGGTTGCACTT  
 GTGATAGAACCTTCTATTACAGAGTGTCGACACGAGTTATTTAAACGAGCACGGGGCTCTAGT  
 GCAGCTCGACTAGAGCCCTGTAATGGAAGTACACGCGATCGTGTAGTCCGTGCTTTTGACA  
 TTTACAATAAGGATGTTGCGTGTATTGGCAAGTTTCTTAAGGTCAACTGTGTCCGTTTTAAG  
 AATCTTGACAAGCATGATGCTTTCTTTGTTGTAAACGTTGTACGAAGTCTGTCATGGAACA  
 CGAGCAGTCCATATATGACAAGCTTCACAGTTGTGGTGCAGTTGCAGTTCATGATTTTTTCTT  
 GTGGAAGATGGCCGTTCACTTTTTGGTAATATTAGCAGGCAAAACCTGACTAAGTATACA  
 ATGATGGACTTGTGTTATGCTTTGAGAAATTTGATGAGCGTAATTGCGAAACACTTAAAGA  
 AATCTTGTCTTACTGGTTGCTGTGACTATTCATATTTGAAAATAAGGATTGGTACGACCC  
 AGTTGAAAATGAGGACATTCATAAAGTTTATGCACACCTTGGAACCTGTTGTCTCTAATGCAT  
 TGCTTAAGTGTGTTAAGCTTTGCGATGCGATGGTAGAGGCAGGTGTAGTGGGTGTGTTAACA  
 CTTGATAACCAAGACCTTAATGGTGATTTTTATGATTTTGGTGACTTTGCTACAACAATACCT  
 AAAATGGGTGTACCATTATGTACCTCTTATTACTCTTATATGATGCCTGTAATGGGTATGAC  
 CAATTGTCTTGCACTGAGTGTTTTATTAAGAGTGACATTTTTGGTAGTGATTTAAGACCTA  
 TGATTTGCTTGAGTACGACTTTACAGAGCACAAAGAGGCTTTGTTTCGTAAGTACTTCAAGT  
 ATTGGGGTCAGGATTACCACCCTAATTGTGCTGATTGTACGACGAGCTTTGTATTGTTCACT  
 GTGCGAATTTTAATACGTTGTTGCCACGACTATTCCTAATACAGCTTTTGGTCCCTCTGTGTC  
 GCAAAGTGTTTGTTGATGGTGTGCCACTTGTTACTACAGCTGGCTACCATTTCAGCAGTTG  
 GGCCTTGTTTGGAATAAGGATATAAATACTCACTCTACTCGTTTGAGTGTAATGAGTTGTT  
 ACAGTTTGTACAGACCCTGCACTTTTGATAGCATCATCACCAGCCCTTGTTGGATCAGCGTA  
 CTGTTTGTTTTTTCACTGCGTGCCTTGAGTACTGGTATGACAAATCAGACAGTTAAGCCAGGC  
 CACTTTAATAAAGAGTTCTACGACTTTTTGAGATCGCAAGGATTTTTTTGAAGAAGGCTCTGA

ATTAACTTTAAAGCATTCTCTTTGCACAGAAGGGTGATGCTGCTGTCAAAGATTTTGACT  
 ACTATCGTTATAATAGACCAACTATGCTAGACATTTGTGAGGCTAGAGTCACTTATAAAATA  
 GTGCAGCGTTATTTTGAGTGCTATGAGGGTGGCTGTATTGCCGCTAAGGATGTTGTTGTACT  
 AACCTCAATAAAAGTGCAGGTTACCCACTTAATAAATTTGGTAAAGCTGGTTTGTATTATGA  
 GTCTCTTAGTTATGAGGAACAAGATGCACTATACGCTCTTACAAAGCGTAATGTGTTACCTA  
 CTATGACACAGCTTAACCTTAAATATGCAATCAGTGGTAAAGAACGTGCTAGGACTGTTGG  
 TGGTGTTCATTGTTGTCTACTATGACTACTAGACAGTTTCATCAGAAACACCTTAAGTCCAT  
 TGTTAATACACGTAATGCATCTGTTGTCATTGGTACCACAAAATTTTATGGTGGTTGGGACA  
 ACATGCTTAAGAACCTTATTGATGGTGGTGACAATGCGTGCCTTATGGGTTGGGATTACCCT  
 AAGTGTGATCGTGCCTCCCTAATATGATTCGCATGATTTCTGCCATGATTTTGGGTTTCGAA  
 GCATGTTACTTGCTGTGATTCTTCTGATAAATATTACCGTCTCTGTAATGAGCTCGCTCAAGT  
 GTTGACAGAAGTTGTATATTCTAATGGTGGGTTTTATCTCAAGCCTGGTGGTACCCTTCTG  
 GCGATGCTACAACGGCTTATGCGAACTCTGTGTTAATATTTTCAAGCTGTTAGCGCCAAT  
 ATTAACAGGTTGCTTAGCATTGATAGCAATGTGTGTAATAATATTGGTGTAAAGAGTTTGCA  
 GCGTAAGCTATATGATTGTTGTTACAGATCTTCTTCAGTAGATGATTCTTTTGTAGACAGTTA  
 TTATTGCTACTTGCGGAAACATTTTTCTATGATGATTTTGTGATGACGGTGTGTGTGTTA  
 TAATAAAGATTATGCTGATTGGGTTATGTGGCAGATATTAATGCCTTTAAAGCTACCCTAT  
 ATTATCAGAATAATGTCTTTATGAGTACTGCTAAATGCTGGGTGGAGCCAGACATTAGCAA  
 AGGTCCTCATGAGTTCTGTTACAGCATACTATGCAGATTGTAGATTCTGACGGCAAGTATT  
 ATTTGCCATACCCAGACCCATCTAGAATATTGTCTGCTGGTGTATTTGTGATGATGTTGTTA  
 AGACTGACGCTGTGATATTGTTGGAGCGCTACGTCTCATTGGCAATCGACGCATATCCTTTG  
 TCTAAACATCATAATCCTGAATATAGAAAAGTGTTTTATACACTTCTAGATTGGGTTAAGCA  
 TCTACACAACACACTTAATCAGGGCGTGCTTGAGTCTTTCTCCGTTACATTGCTTGAGGATG  
 TATCCTCTAAGTTTTGGGATGAGAGTTTTATGCTAGTTTGTATGAAAAGTCTACAGTACTTC  
 AAGCCGCAGGCCTATGTGTTGTTGTGGTTCTCAAACGTACTGCGTTGTGGTGATTGTCTTA  
 GACGACCTATGTTGTGCACTAAGTGTGCTTACGACCATGTTGTACCACGAATCATAAATTC  
 ATTCTGGCTATAACACCTTACGTTTGTAATGCTTCTGGTTGCACCGTTAATGATGTGACTAAG  
 TTGTATTTAGGAGGTCTGAGTACTGGTGTATAGACCATAAACCTACACTGTCACTACCCT  
 TTGTAGTGCAGGTAATGTTTTGTTTTGTATAAAAACCTCTGCTACAGGTTACCCGGATGTAG  
 AGGTTTTTAATACACTTGCCACGTGAGATTGGACTGACGTTAAAGATTACAAGCTGGCTAAT  
 GAATGCAAGGATTCTCTTAGGCTTTTTGCGGCTGAGACTGTTAAAGCCAAAGAAGAGAGTG  
 TAAATCCTCTTATGCTTGTGCTACACTTAAAGAAGTTGTTGGGCCACGTGAGTTGATTCTTA  
 GTTGGGAGTGCGGAAAAATTAAACCGCCACTTAACCGTAATTCAGTGTTCAGTGTTCAG  
 ATTTCTAAAGACTCTAAGTCCAGGTTGGAGAGTTTACGTTTGAAAAATTGGATTACGGTTC  
 TGATGCTGTGTTACAAGTCTACCACCACAGTTAAATTAGTGCCTGGTATGATTTTTGTCT  
 CACATCACACAATGTACAGCCGCTTAGGGCTCCCACTATTGCTAATCAAGAACGCTATGCT  
 TCAATTTATAAACTGCACCCTACTTTTAATATTAGTGATGCTTATGCCAATTTGGTGCCGTAC  
 TACCAATGATTGGCAGACAACGAATCACTACTATTCAAGGCCACCGGGAAGTGGCAAG  
 TCCATTGTGTTATAGGTCTGGGTCTTTATTACCCAGGTGCTAGGATGGTCTTTGCGGCTTGC  
 TCTCATGCAGCCGTAGATTCACTTTGTGTCAAGGCTGCCACTGCTTATAGTGTAGACAAATG  
 CACTCGTATTATCCCTGCCCCGTGCTAGGGTTGAGTGTATAGTGGGTTTAAAGGTAAATAACA  
 CTCAGGCACAGTACATCTTTCAACAGTCAACGCACTCCCTGAGTGTAAATGTTGACATAGTT  
 GTTATAGATGAAGTGTCTATGTGTACTAATTATGACCTGTCCGTTATTAACCAGCGGTTGTCT  
 TATAAACATATTGTTTATGTGGGTGACCCACAGCAATTACCAGCGCCACGTACCATGATCA  
 CTAAAGGCGTTCTCGAACCTAAGGACTATAATGTTGTAACCTCAGAGGATGTGTGCTGTTGG  
 GCCAGATGTCTTCTTGCTATAAATGTTACAGATGTCTGCTGAGATTGTTAAAACAGTCTCAG  
 AGTTGGTTTATGAGAATAAGTTTGTACCTGTTTATGCTGATAGCAAACAGTGTTTAACTG  
 TTTTGTAAAGGCAATGTTACAGTTGACAATGGTTCTAGTATTAACAGAAAGCAATTGGATAT  
 CGTCAAGATGTTCCCTGCTAAGAATCCACGTTGGTCTAAAGCTGTGTTTATCTCACCTTATA  
 ATAGTCAGAATTATGTGGCTAGTAGGGTTTTGGGTTTGCAGATTGAGTGTGACTCCTCT  
 CAAGGTAGTGAATATGACTATGTCATATACACACAGACGTCAGACACAGCACATGCTTGCA  
 ATGTTAATAGATTTAATGTTGCAATTACAAGAGCCAAGAAGGGTATTCTTTGTGTTATGTGT

GATCGGGAGTTGTTTGATGCTCTGAAATTTTTTCGAGATCAAGCTTTCTGACTTGCAGGCTAG  
TGGTGATGGCTGTGGTCTTTTTAAAGATTGTTACAGGAAAGATGATGAATTACCTCCATCTC  
ATGCGGCTACCTATATGGCCTTGCTGACAACCTTAAGGTCAATGGTGATCTTGCTGTTTCA  
ATTGGCTTTAAAGGTGTGTGTAAGTATGAGCATGTTATTTCTTTTATGGGCTTCAGGTTTGAT  
ATTAATGTGCCTGAACAGCATAGTCTTTTCTGTACCAGGAATTTTGCAATGCGCCACGTGCG  
TGGTTGGCTTGGTATGGATGTAGAAGGTGCCCACGTTACAGGTGAAAATGTAGGTAATAAT  
GTACCATTACAAGTAGGCTTCTCTAATGGTGTTGATTTTGTGTGTTCAACCGGAAGGTTGTGTT  
GTCCTGAGACAGGCAGCAGGATCGTACCTGTTAGAGCTCGTGCTCCGCCAGGTGAACAGT  
TCACACATTTGGTCCCCCTGCTTCGTAAGGGACAACCGTGGGCTGTGGTTCGTAACGCATT  
GTTTCAAGTGTGTTGCGATTACTTGGTGAACCTATCAGACATATTAATCTTTGTTTTGTGGGCT  
GGTGGTTTTGGAGTTGACTACCATGAGATATTTTGTTAAAATTGGACCAAGCAAAGTTTTGTGA  
GTGCGGCAAGGTGGCCACTTGTACAATAGTGTGACTCATGCATACTACTGTTTCAAGCATG  
CCTTAGGGTGTGATTATTTGTACAATCCTTATGTTATTGACATTTCAGCAGTGGGATTATACAG  
GTTCACTTAGCCATAATCATCATGAGCATTGTAATGTACATCGCAATGAGCATGTTGCATCT  
GGTGATGCTATTATGACTCGTTGTCTTGCTGTGTATGATTGCTTCGTCAGAAGCGTTGATTGG  
TCCATTACTTACCCATTTCATTGCTAATGAACATGCCATTAATAAGAGTGGTAGAGTTGTGCA  
ATCTATGGTTGTCAAAACAGCTATAAAGTTATATAATCCTAAAGTAATTCATGATATTGGTA  
ATCCTAAAGGTATTAGGTGTGCAGTTACTGATGCACACTGGTTTTGCTATGATAAGCAGCCC  
CTCAATTCCAATGTCAAGTTGCTTGAGTATGATTATATAACTCATGGTCAAATGGATGGGTT  
ATGCCTATTTTGAATTGCAATGTTGACATGTATCCTGAATTTTCTATTGTGTGCCGTTTTGA  
CACTCGTTGTAGGTCAAATCTCAACTTAGAAGGTGTTAACGGAGGTTCACTTTATGTCAACA  
ATCATGCATTTTTTACACCTGCATTTGATAAGCGTGCAATGGCTAAACTTAAGCCTATGCCC  
TTCTTTTTCTATGATGACACGCCTTGCGATCGTGTTTCATGACCAGATAAATTATGTACCACTG  
CGTGCTAGTACTTGTATTACAAAGTGTAATATTGGTGGTGCTGTTTGCAGTAAGCATGCCAA  
TATGTTTCATGCCTATGTTAATGCATATAATACTTTCACGCAGGCTGGTTTTACTATTTGGGT  
TCCTGTAACCTTTGATTTGTTTAACTTTGGCAAACATTTGTGAACTAACTTGCAAGGCTT  
GGAGAACATAGCGTTTAAATGTCTCAAGAAAGGGTCTTTTGTGGTGTAGAGGGTGAACATA  
CCGGTTGCTATCGTTAATGACCGTGTGCTGGTACGTGATGGCACCGTGGATAATTTGATTTTT  
ACTAATAAAACCTCATTACCTACTAATGTTGCTTTTCGAGCTTACGCCAAACGTAAAATGGG  
TTTGACACCACCTCTTGCTGTTCTCAGGAATCTCGGTGTTGTTAGTACCTATAAGTTTGTGTT  
ATGGGATTATGAGGCAGAAAGACCATTTACTACTTTTACTAAAAATGTTTGCAGTTACACA  
GACTTTGACGAGGATGTGTGCACTTGCTTTGATAATAGCATTACAGGTTTCGTTTGAACGCTT  
TTCAATGGCTAACAAATGCAGTGCTTATTTCCACATCTGCTGTTAAGAAGCTTACTTGTATTA  
AGCTTAACTATGGTTTGCTTAATGGTGTGGCTGTTTCTAAGACTGGTGACAAGCCTGTTACA  
TGGTATATCTATGTCCGTAAAAATGGTCAATTTGTTGACCAATTTGACGGATATTTTACTCA  
GGGGCGTACTACTATTGATTTCTTACCTCGTAGTGTTATGGAGGAAGACTTTTTAAACCTTG  
ATATGGGTTTGTATTATTAGTAAGTACGGTCTTGAGGACTATGCTTTTGAGCATGTCGTGTATG  
GTGACGTGTCTGGTACTACACTTGGTGGACTACATTTATTAATTTCTCAAGTACGCCTTGGA  
AAAATGGGTGTCTTGAAAGTGGATGAGTTCACACATAGTGAGGATAGTACATTGAAGTCCT  
GTACAGTCACCTATTCTAATGATCCTAGTAGTAAAATGGTTTGTACCTATATGGATTTGTTGC  
TAGATGATTTTGTACCATTTTAAAATCTTTGGATTGGGTGTAATTTCTAGAGTTCATGAAG  
TTGTAGTCGATTGTAAGGTTTGGCGTTGGATGTTGTGGTGAAGGACCACAAAGTTCAAACG  
TTCTACCCACAGTTGCAGTCGTCAGAATGGAAATGTGGTTATTCCATGCCCTCACTGTATAA  
AATACAGCGTATGTGTCTTGAGCCCTGTAATTTGTACAATTATGGTGCTAGTCTTAAGCTAC  
CTGAAGGTATCATGTTTAAACGTGGTCAAATACACTCAGTTATGTCAATATTTGAATAGTACT  
ACTATGTGTGTACCGCATAATATGCGTGTACTACATCTTGGTGCTGGCTCAGATAAAGGAGT  
CGCACCTGGTACTGCTGTATTGCGTCGTTGGTTACCCAGTGATGCTATTATTGTTGACAATG  
ATGTTAATGACTATGTTAGTGATGCAGATTTTCAGTGTAACAGGGGATTGCGCCACTTTGTAC  
TTACAGGATAAGTTCGACTTAGTGTTTCAGACATGTATGATGGCCGTATTAAACAGTATGA  
TGGTGTTAATGTTTCAAAGGATGGCTTCTTTCTTACATCAATGGTGTGATATCAGAGAAGC  
TTTCCCTAGGTGGTACAGTTGCCATTAAGATTACTGAGTATAGCTGGAATAAGCGGCTGTAT  
GAGTTGATACAAAAGTTTGAATTTTGGACGTTGTTTTGTACTAGTGTGAATACATCATCGTCT

GAAGCTTTTCTAATTGGTGTCAACTATCTTGGCGACTACGCTACTCAGCCCATTATGGATGG  
CAATACTATGCACGCTAATTATGTGTTTTGGCGTAATTCTACAATTATGTCCATGTCATATAA  
TAGTGTGCTTGATCTAGCAAAGTTTAATTGTAGACATAAAAGCTACGGTTGTTATTTCACTTA  
AAGAAAGTGATTTGAATGATGTTGTGGTAGGCCTTATAAAGAATGGAAAGTTGTTGGTTAG  
AAAGAGTGGTGTCAATTTGTGACTATGGTAACCATTTAGTTTCAACTAAATAA

>SYRL007

GATGGTGTTGTTTGTATAATAAGGAGTATGCGGCTTTAGGTTATGTTGGTGATATATCAGC  
ATTTAAAGCTACTCTTTATTATCAAAACAATGTTTTTATGAGCACATCTAAGTGTTGGGTAG  
AAGAAGACCTTAGTGTCGGACCACATGAATTCTGTTCAACACACAATGCAAATTGTTGA  
TGCTGATGGTACATATTATCTCCCATACCCAGATCCTAGTAGAATTATTAGTGCTGGTGTTTT  
TGTGGATGATGTTGTGARAACCTGATCCTATTATCTTGTTAGAACGTTATGTGTCACTGGCAAT  
AGATGCATACCCACTTTCTAAGCATCCCAACAGAGAGTACCGTAAGGTTTTCTATGTTCTGT  
TGGATTGGGTAAAGCATCTGCACAACACACTTAATGAAGGCATTCTTGAAAC
