# Supplementary material for: A Novel Coronavirus and a Broad Range of Viruses in Kenyan Cave Bats
Source: Viruses. 2022 Dec 17;14(12):2820. doi: 10.3390/v14122820 (PMC9785147; doi:10.3390/v14122820)
Supplement: Supplementary file 1 [file viruses-14-02820-s001.zip]

Archive with 14 entries (14 files):
- FigureS1.pdf
- FigureS10.pdf
- FigureS2andS3.pdf
- FigureS4.pdf
- FigureS5.pdf
- FigureS6.pdf
- FigureS7.pdf
- FigureS8.pdf
- FigureS9.pdf
- Supplementary Data S1.pdf
- TableS1.xls
- TableS2.pdf
- TableS3.pdf
- TableS4.pdf
