# Supplementary material for: A Novel Coronavirus and a Broad Range of Viruses in Kenyan Cave Bats
Source: Viruses. 2022 Dec 17;14(12):2820. doi: 10.3390/v14122820 (PMC9785147; doi:10.3390/v14122820)
Supplement: Supplementary file 1 [file viruses-14-02820-s001.zip › TableS1.xls]

## Sheet: Sheet1
Supplementary Table 1: Individual and sequencing Information on samples evaluated in the study
					Virus reads						Bat Info
	Species	Sample	Total reads	Non-classified reads	Astroviridae	Circoviridae	Coronaviridae	Dicistroviridae	Herpesviridae	Retroviridae	Mass (g)	Forearm length (mm)	Ectoparasites
Site 1	Myotis tricolor	MEMT001	1032822							6963	12	50	No
	(n:9)	MEMT002	350750	8539						662	15	46.5	Yes
		MEMT003	1009228	31035						4072	12	51	Yes
		MEMT004	211946							164	12	51	Yes
		MEMT005	7802182	134692						5864	13	51.1	Yes
		MEMT006	506768		285					15	12	50.3	No
		MEMT007	781012	4783						4242	11.5	48.4	Yes
		MEMT008	2649856	3846						3961	13	50.3	No
		MEMT009	346372	7956						93	12	50	No
	Miniopterus natalensis	MEMN002	440216		52						10	48.8	No
	(n:2)	MEMN006	124152					4			10	43.7	No
Site 2	Miniopterus natalensis	SYMN003	2294502	10555						3322	9	46.8	Yes
	(n:5)	SYMN007	3548318	2211	1084						9	44.3	No
		SYMN010	1183908	861	31						16	49.5	No
		SYMN011	940172	1289	22	234					14	51.6	No
		SYMN012	1863858	7410	2239						14	49.2	No
	Rhinolophus landeri	SYRL001	3302342							265	7	45.6	No
	(n:8)	SYRL002	1086546							396	9	46.7	No
		SLRL004	176918		12					110	7	44.4	No
		SLRL005	1369320	3025						315	8	46.7	No
		SLRL006	1284064	2316						257	7	45.3	No
		SYRL007	705708		193		216			91	7	44.1	No
		SLRL008	943774	5399						150	8	44.6	No
		SYRL009	418040	1119						275	8	46.2	No
	Miniopterus africanus	SYMA002	202296							62	16	51.1	Yes
	(n:8)	SYMA003	3085988	2683	240						15	50.5	Yes
		SYMA004	3577891	8133							17	50.2	Yes
		SYMA005	1759258	2890	254						15	49.4	Yes
		SYMA006	2579992		349						16	52.3	No
		SYMA008	1105402	1750	204				36		15	50.2	No
		SYMA009	138290	111	20						22	51.9	No
		SYMA010	3313742	4526	2061						13	50.7	No
Site 3	Otomops harrisoni	SUOHC1001	4597516				1888			437	38.5	67.1	No
	(n:22)	SUOHC1002	1929222	119712						202	40	69.3	No
		SUOHC1003	1079408	1151						14	33	70.5	Yes
		SUOHC1004	2314144	22293			8679			200	45.5	68.6	No
		SUOHC1005	1634030	2180			52355			737	41.5	66.2	Yes
		SUOHC1006	6861587	310						254	46	68.7	Yes
		SUOHC1007	5362959	763						1210	43.5	66.1	Yes
		SUOHC1011	1732302							300	47	70.2	Yes
		SUOHC1012	1350888				60				43.5	68.1	Yes
		SUOHC1013	643314	1074			41161			958	43	66.2	No
		SUOHC1014	1241296	22171						73	45	67	No
		SUOHC2001	4046240	15339			2126			327	43	67.1	Yes
		SUOHC2002	2096250	28703						206	39	66.1	No
		SUOHC2004	1605792				198			326	43	68.3	No
		SUOHC3001	1604968	6227			22981			691	43	67	No
		SUOHC3002	1335162				11905			155	38	69.6	Yes
		SUOHC3003	2247821							409	41.5	67.5	No
		SUOHC3004	5089243	5193			12125			1193	46	67.2	No
		SUOHC3005	1878592	76472			34			124	38.5	67	No
		SUOHC3006	2511364	38585						624	42.5	67.1	No
		SUOHC3007	4292309	17617			265			245	41	65.3	No
		SUOHC3008	3047160							61	45	66.7	No
