# Supplementary figures and images for: A Novel Coronavirus and a Broad Range of Viruses in Kenyan Cave Bats
Source: MDPI journal article supplement (doi:10.3390/v14122820), 2022-12-17

Tree scale: 0.25

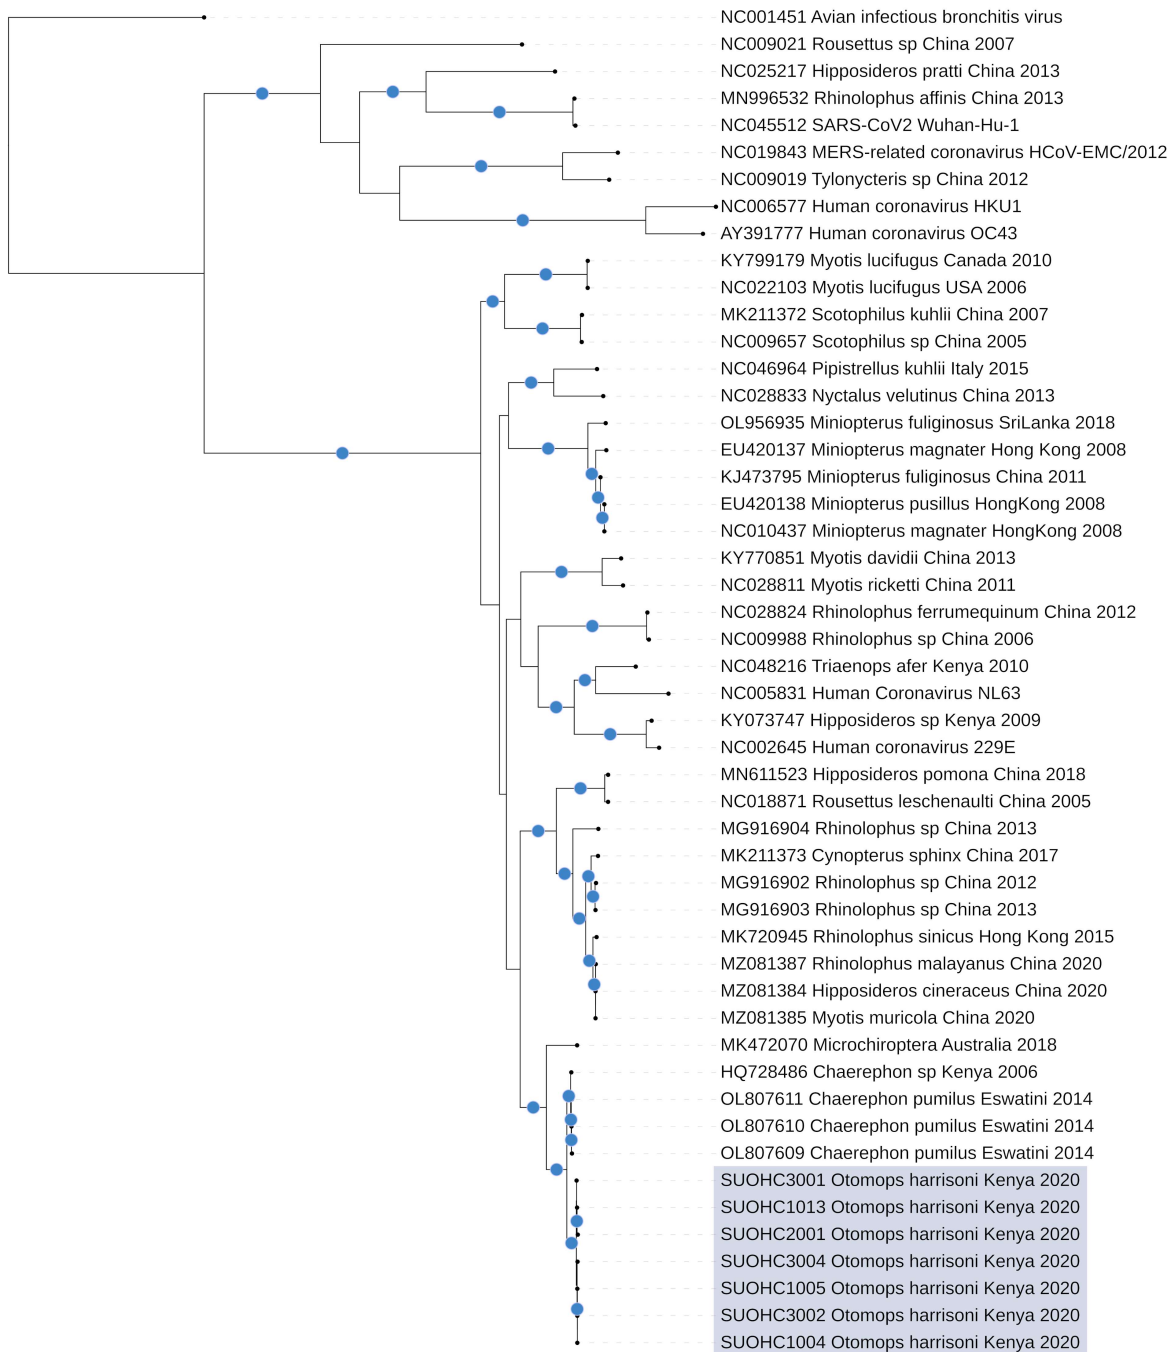

Alpha coronavirus

Supplement: s1 [file s1]
